# Supplementary material for: g-C3N4/metal halide perovskite composites as photocatalysts for singlet oxygen generation processes for the preparation of various oxidized synthons
Source: Royal Society of Chemistry journal article supplement (doi:10.1039/d0cy02352c), 2021-01-01

# g-C<sub>3</sub>N<sub>4</sub>/Metal Halide Perovskite Composites as Photocatalysts for Singlet Oxygen Generation Processes for the Preparation of Variable Oxidized Synthons

Marco Corti,<sup>a</sup> Rossella Chiara,<sup>a</sup> Lidia Romani,<sup>a</sup> Barbara Mannucci,<sup>b</sup> Lorenzo Malavasi,<sup>a\*</sup> Paolo Quadrelli<sup>a\*</sup>

<sup>a</sup> Dipartimento di Chimica, Università degli Studi di Pavia, Viale Taramelli 12, 27100 – Pavia, Italy

<sup>b</sup> Centro Grandi Strumenti, Università degli Studi di Pavia, Via Bassi 21, 27100 – Pavia, Italy

1. Experimental method

Pag. S2

2. LC-MS spectra

Pag. S3

## Catalysts legend:

| Entry | Catalyst | Formula                                                                |
|-------|----------|------------------------------------------------------------------------|
| 1     | C1       | g-C <sub>3</sub> N <sub>4</sub> /PEA <sub>2</sub> PbCl <sub>4</sub> 5% |
| 2     | C2       | g-C <sub>3</sub> N <sub>4</sub> /PEA <sub>2</sub> SnBr <sub>4</sub> 5% |
| 3     | C3       | g-C <sub>3</sub> N <sub>4</sub> /PEA <sub>2</sub> PbBr <sub>4</sub> 5% |
| 7     | C4       | g-C <sub>3</sub> N <sub>4</sub> /DMASnBr <sub>3</sub> 5%               |

## 1. Experimental method

For all the DA and ene reactions the following experimental procedure was used:

1.4 mmol of diene or alkene substrates were dissolved in 20 mL pure acetonitrile in the presence of 15 mg of the catalyst (typically 13% w/w) in a 35 mL cylindrical pyrex reaction vessel and the mixture was saturated with oxygen gas by bubbling for 15 minutes. The sealed vessel was then irradiated under vigorous stirring in a Solar Box Co.Fo.Me.Gra. 1500e (500 W/m<sup>2</sup>) for 24 hours (unless specified). Further saturations with oxygen (a couple) were done during the reaction time. After this period of time, the suspension was filtered off to obtain a clear solution that was evaporated at moderate reduced pressure heating with a water bath at 30 °C. The residues were submitted to GC-MS analyses to determine the structures of the products and the corresponding yields.

## 2. LC-MS spectra

### Blank experiments

d:\lavoricgs\_2020\...\quadrelli45

2/13/2020 5:04:47 PM

bianco\_catB CH

RT: 10.80 - 17.65

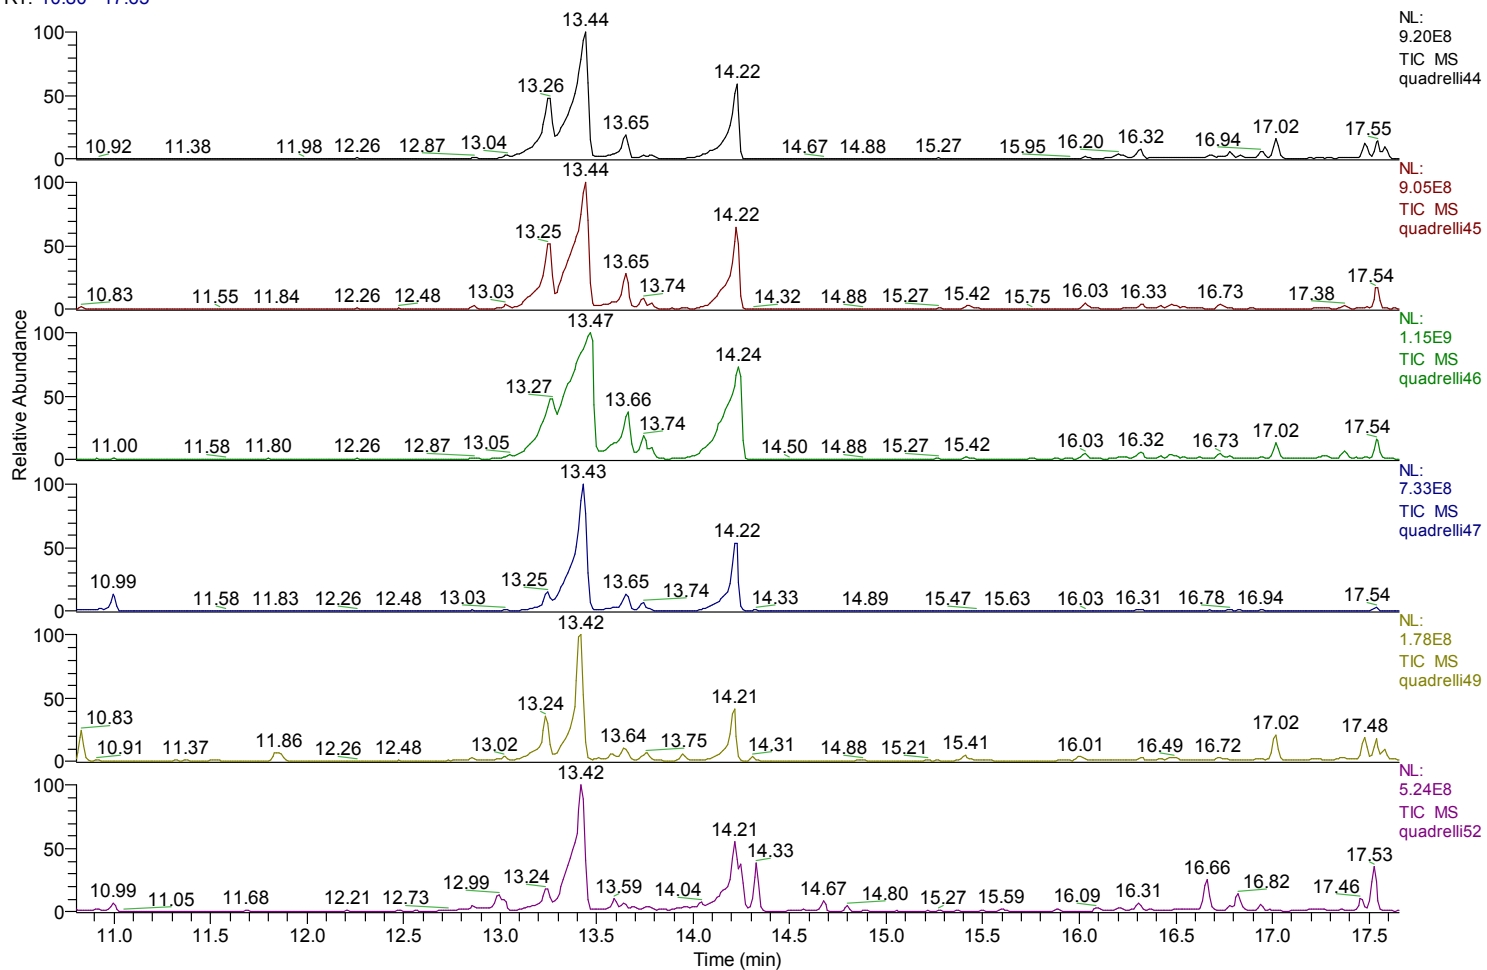

**C1, Reaction with 1,3-cyclohexadiene**

RT: 5.00 - 15.00

NL:  
1.77E8  
TIC MS  
quadrelli25

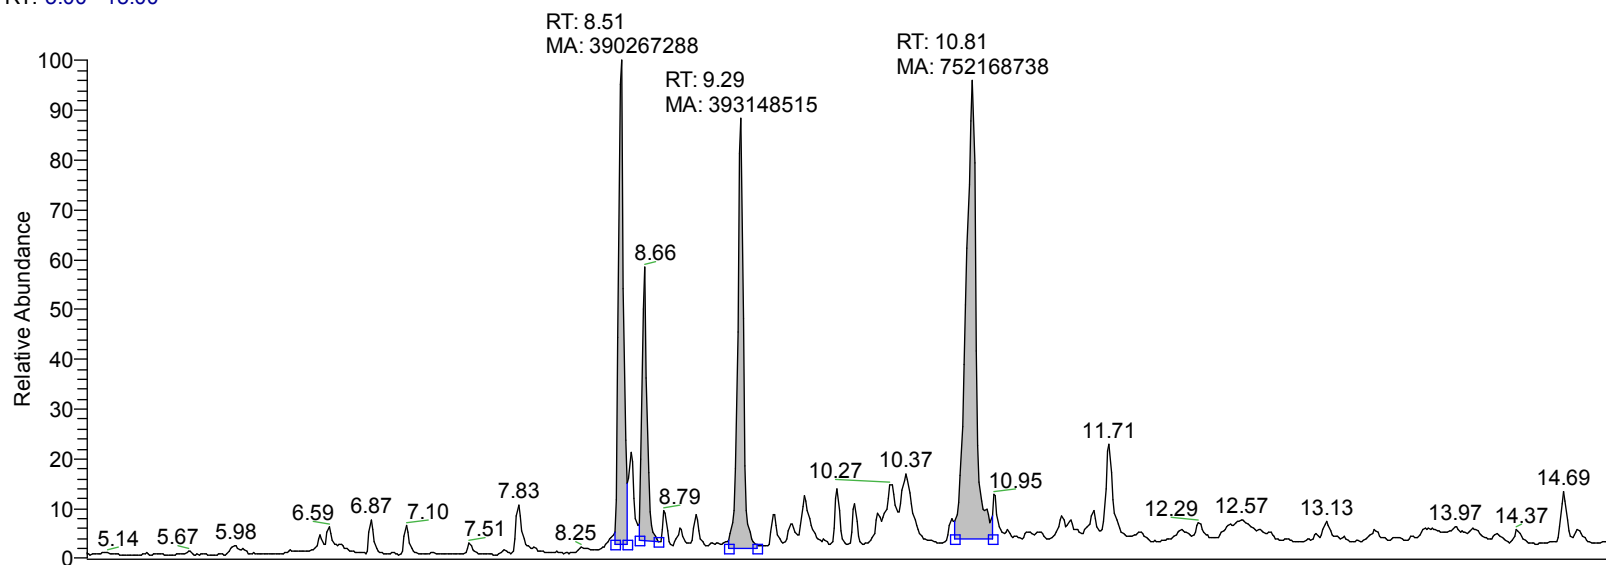

NL:  
9.20E8  
TIC MS  
quadrelli44

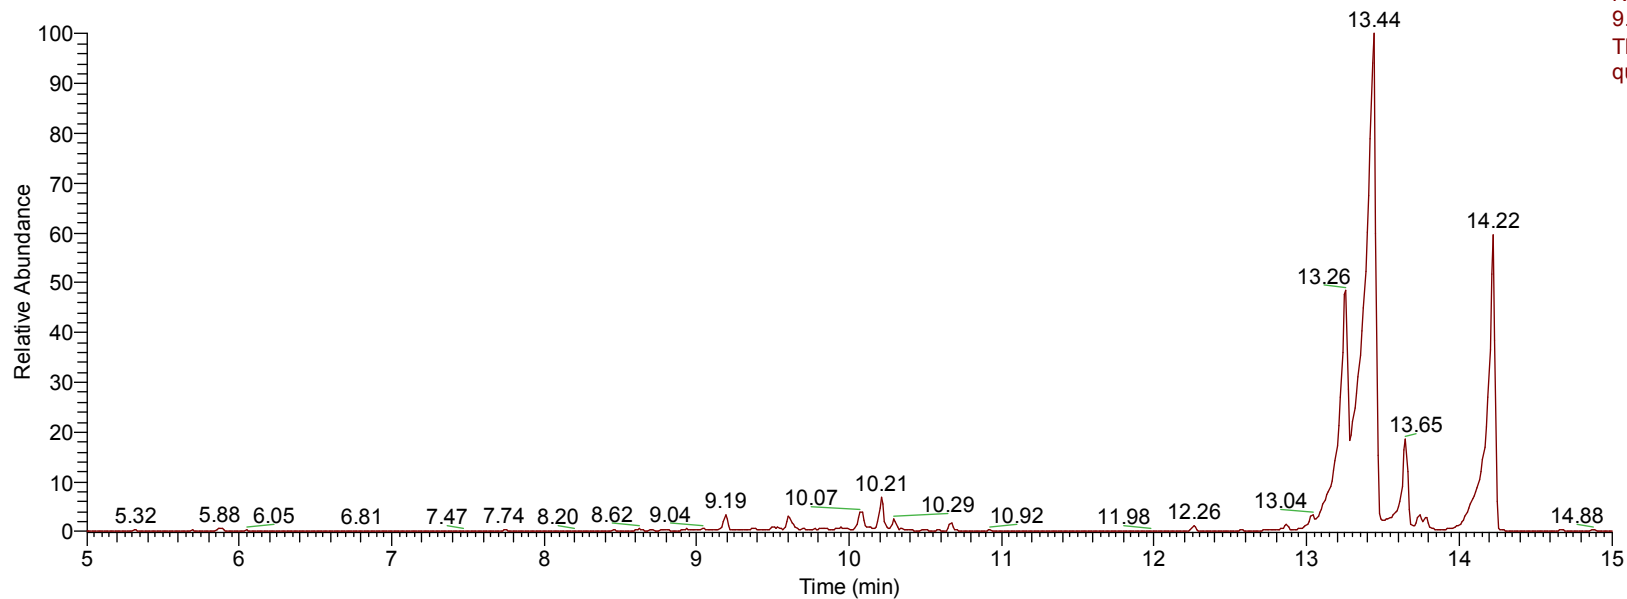

quadrelli25 #680 RT: 10.81 AV: 1 NL: 5.46E7  
T: + c Full ms [35.00-450.00]

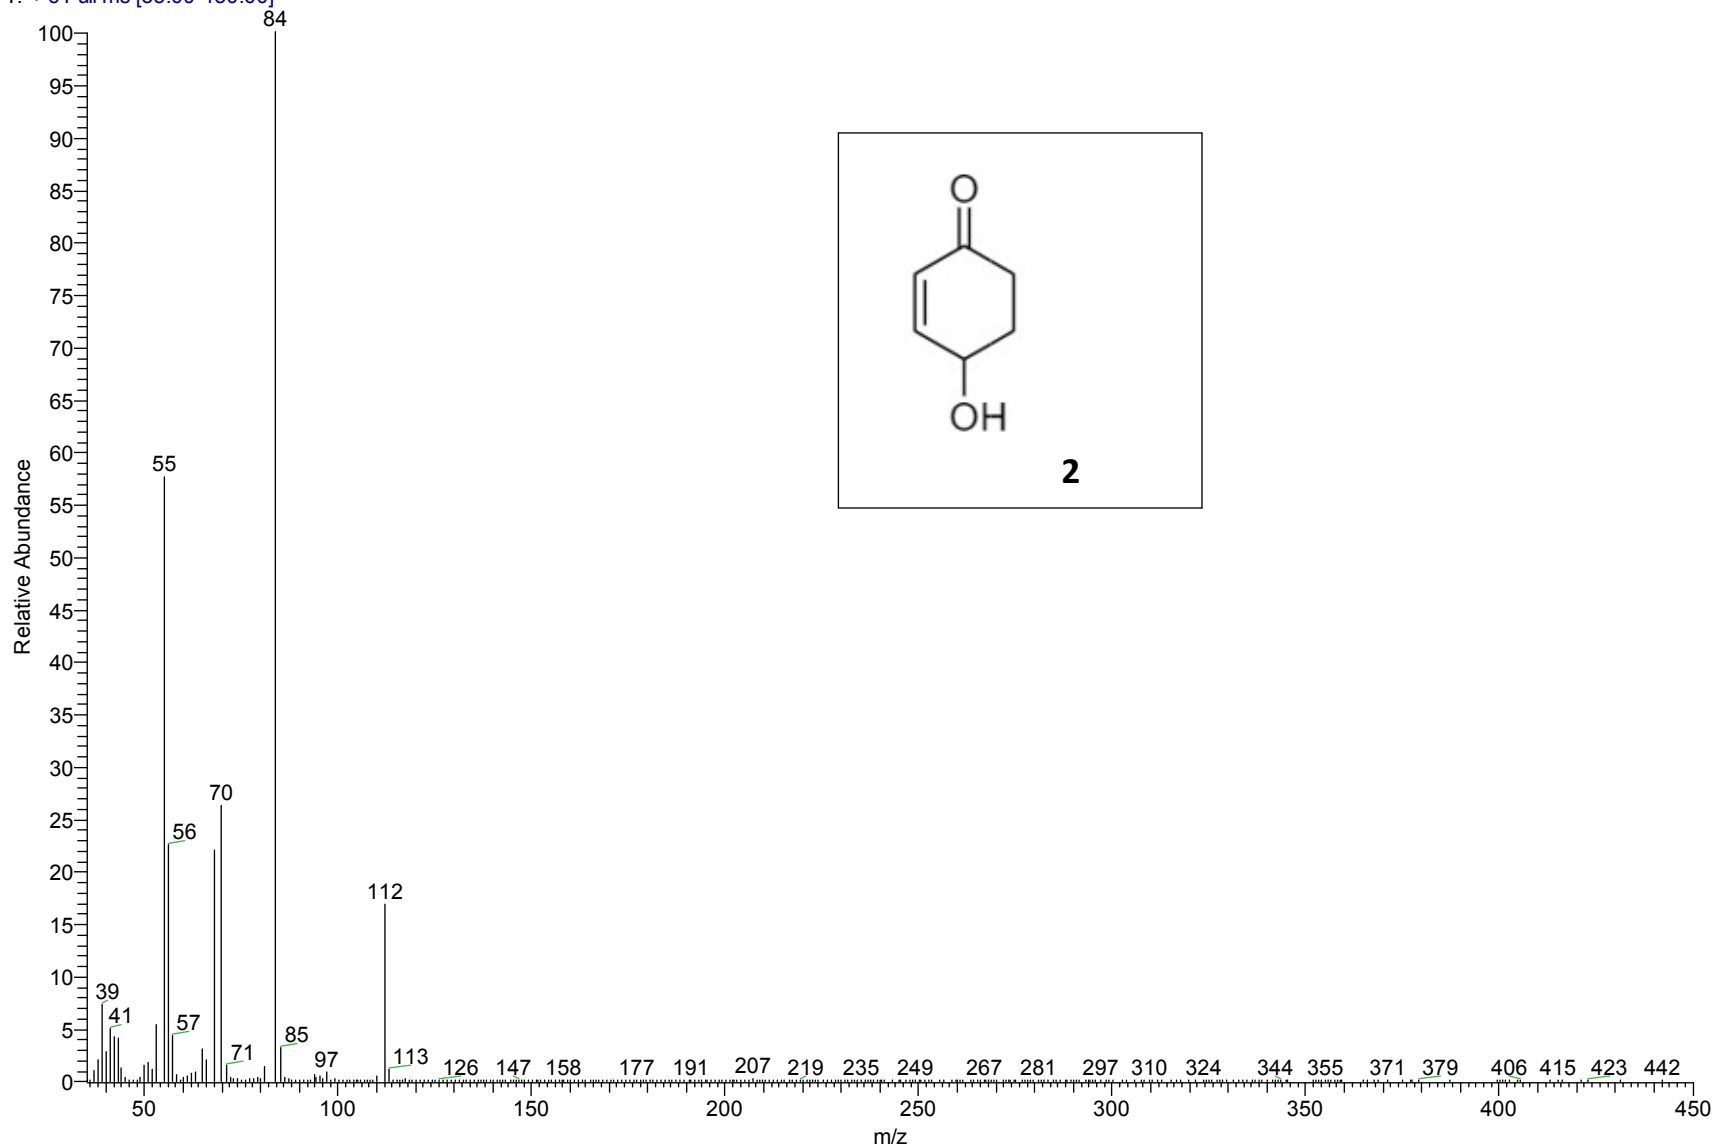

## C2, Reaction with 1,3-cyclohexadiene

RT: 5.00 - 15.00

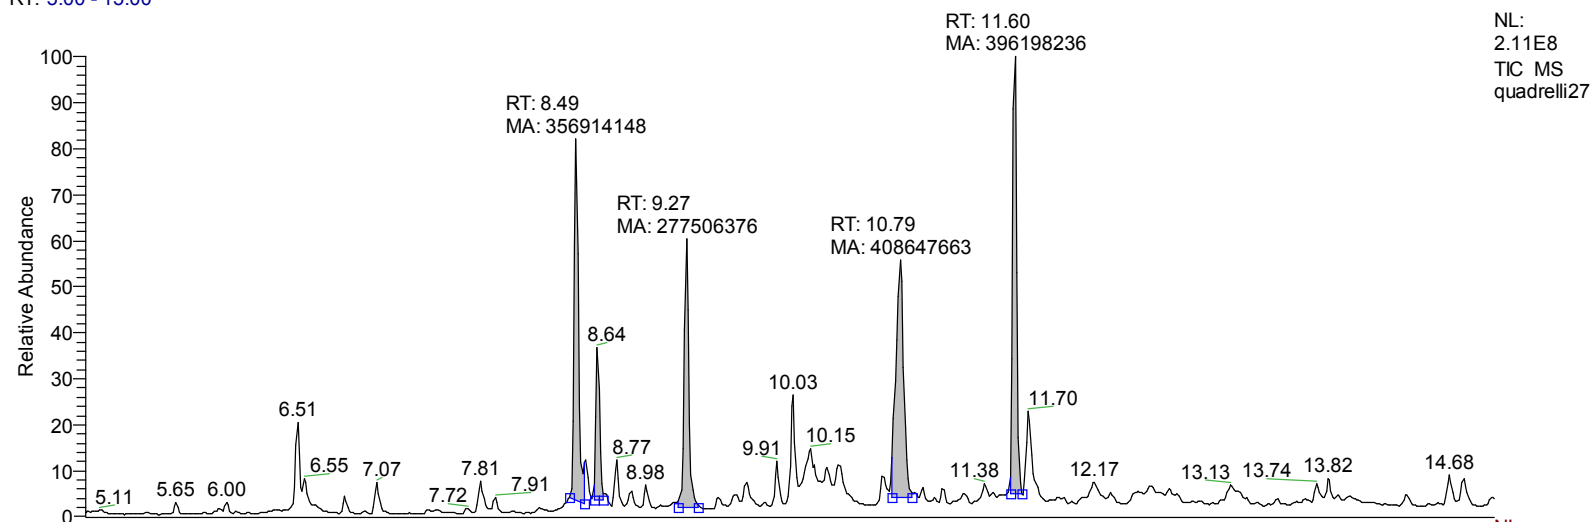

NL:  
2.11E8  
TIC MS  
quadrelli27

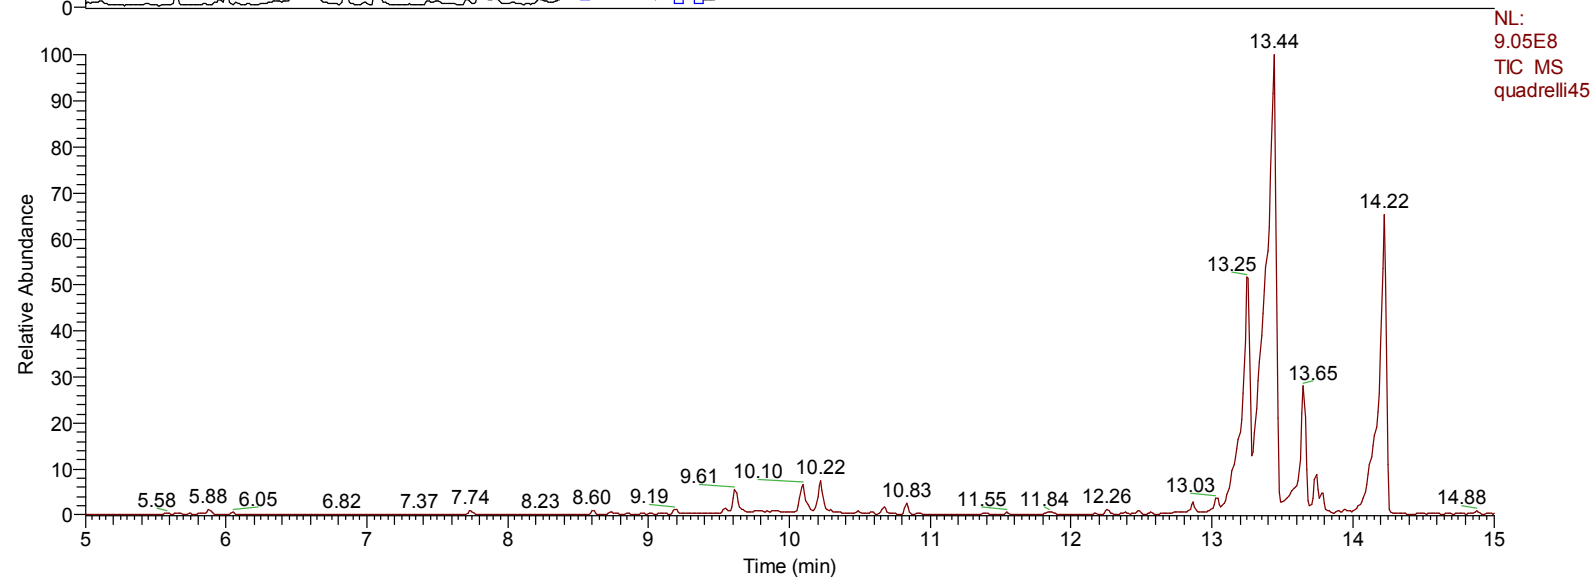

NL:  
9.05E8  
TIC MS  
quadrelli45

quadrelli27 #678 RT: 10.79 AV: 1 NL: 3.79E7  
T: + c Full ms [35.00-450.00]

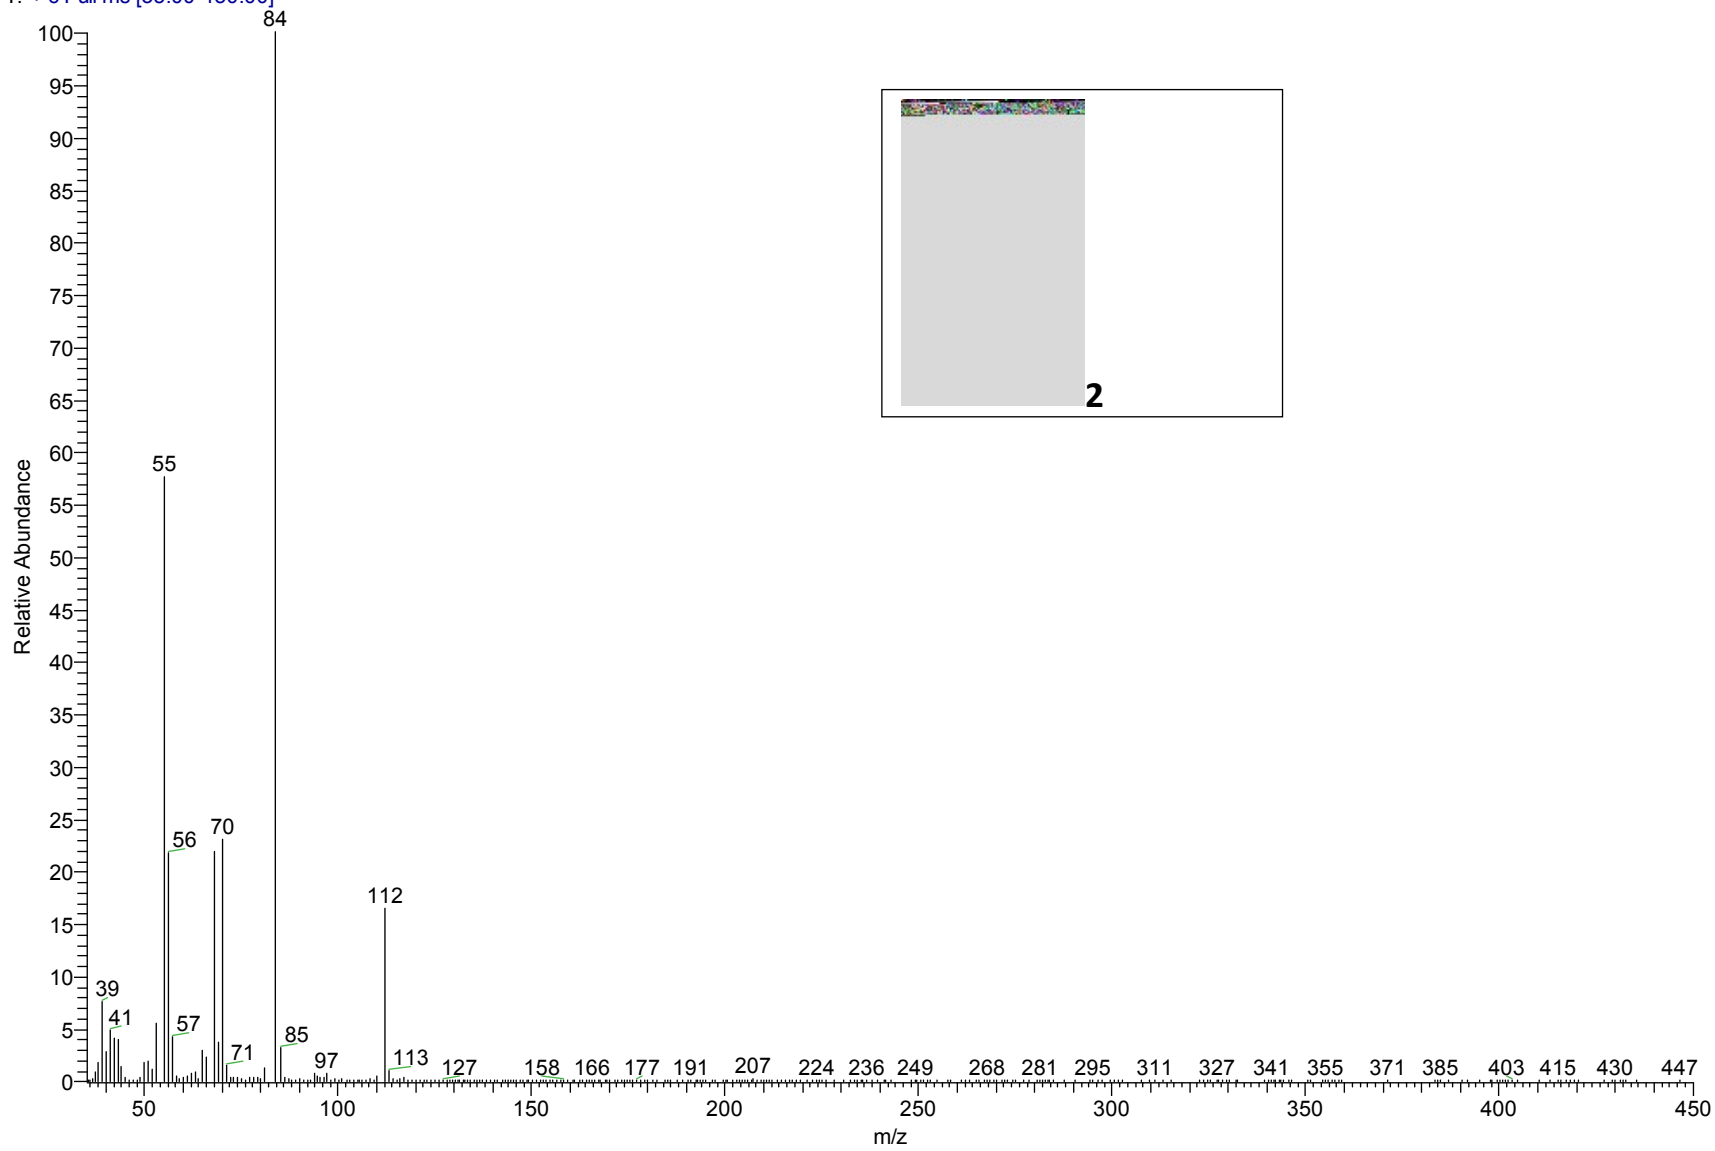

### C3, Reaction with 1,3-cyclohexadiene

RT: 5.00 - 15.00

NL:  
2.05E8  
TIC MS  
quadrelli30

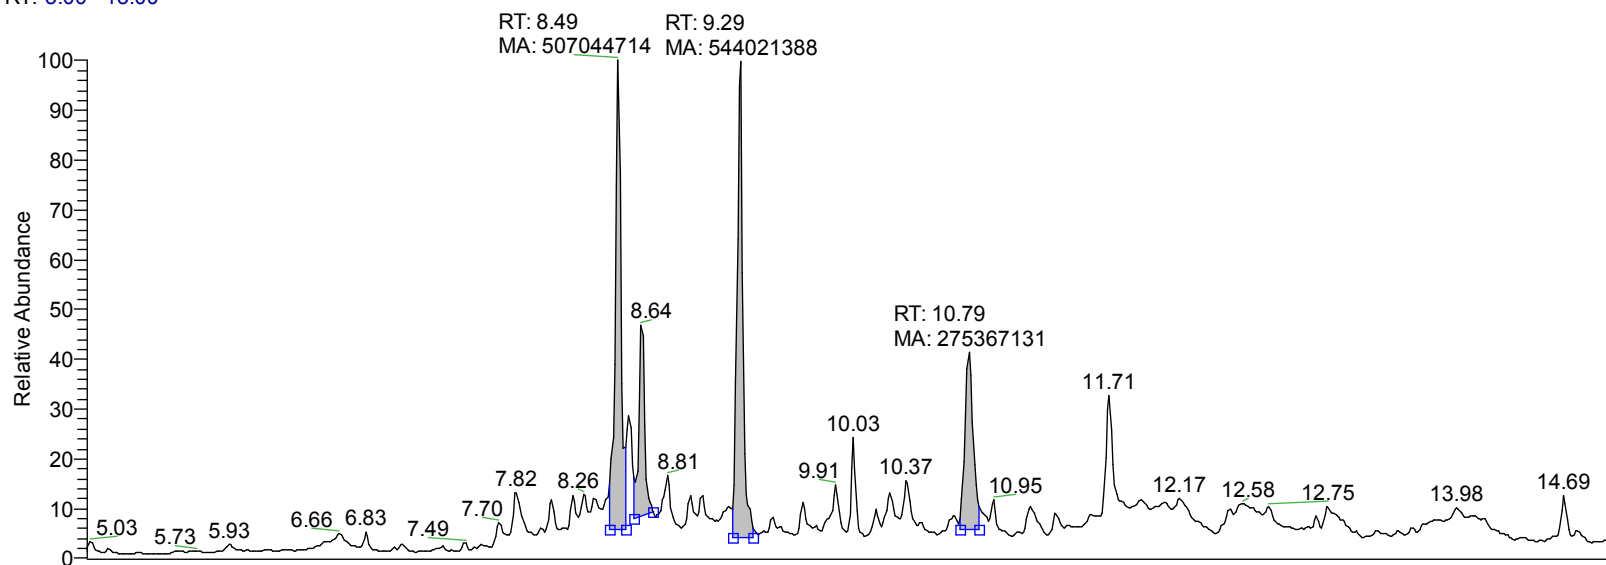

NL:  
1.15E9  
TIC MS  
quadrelli46

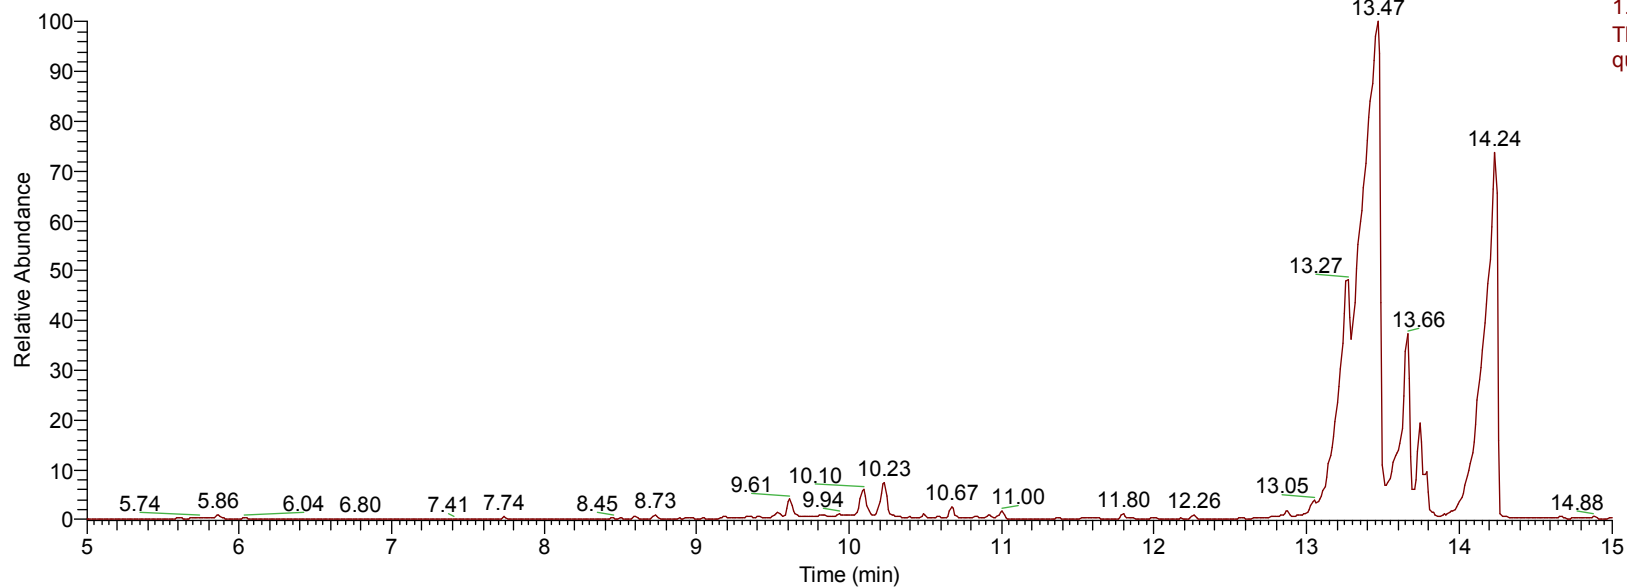



quadrelli30 #678 RT: 10.79 AV: 1 NL: 2.41E7  
T: + c Full ms [35.00-450.00]

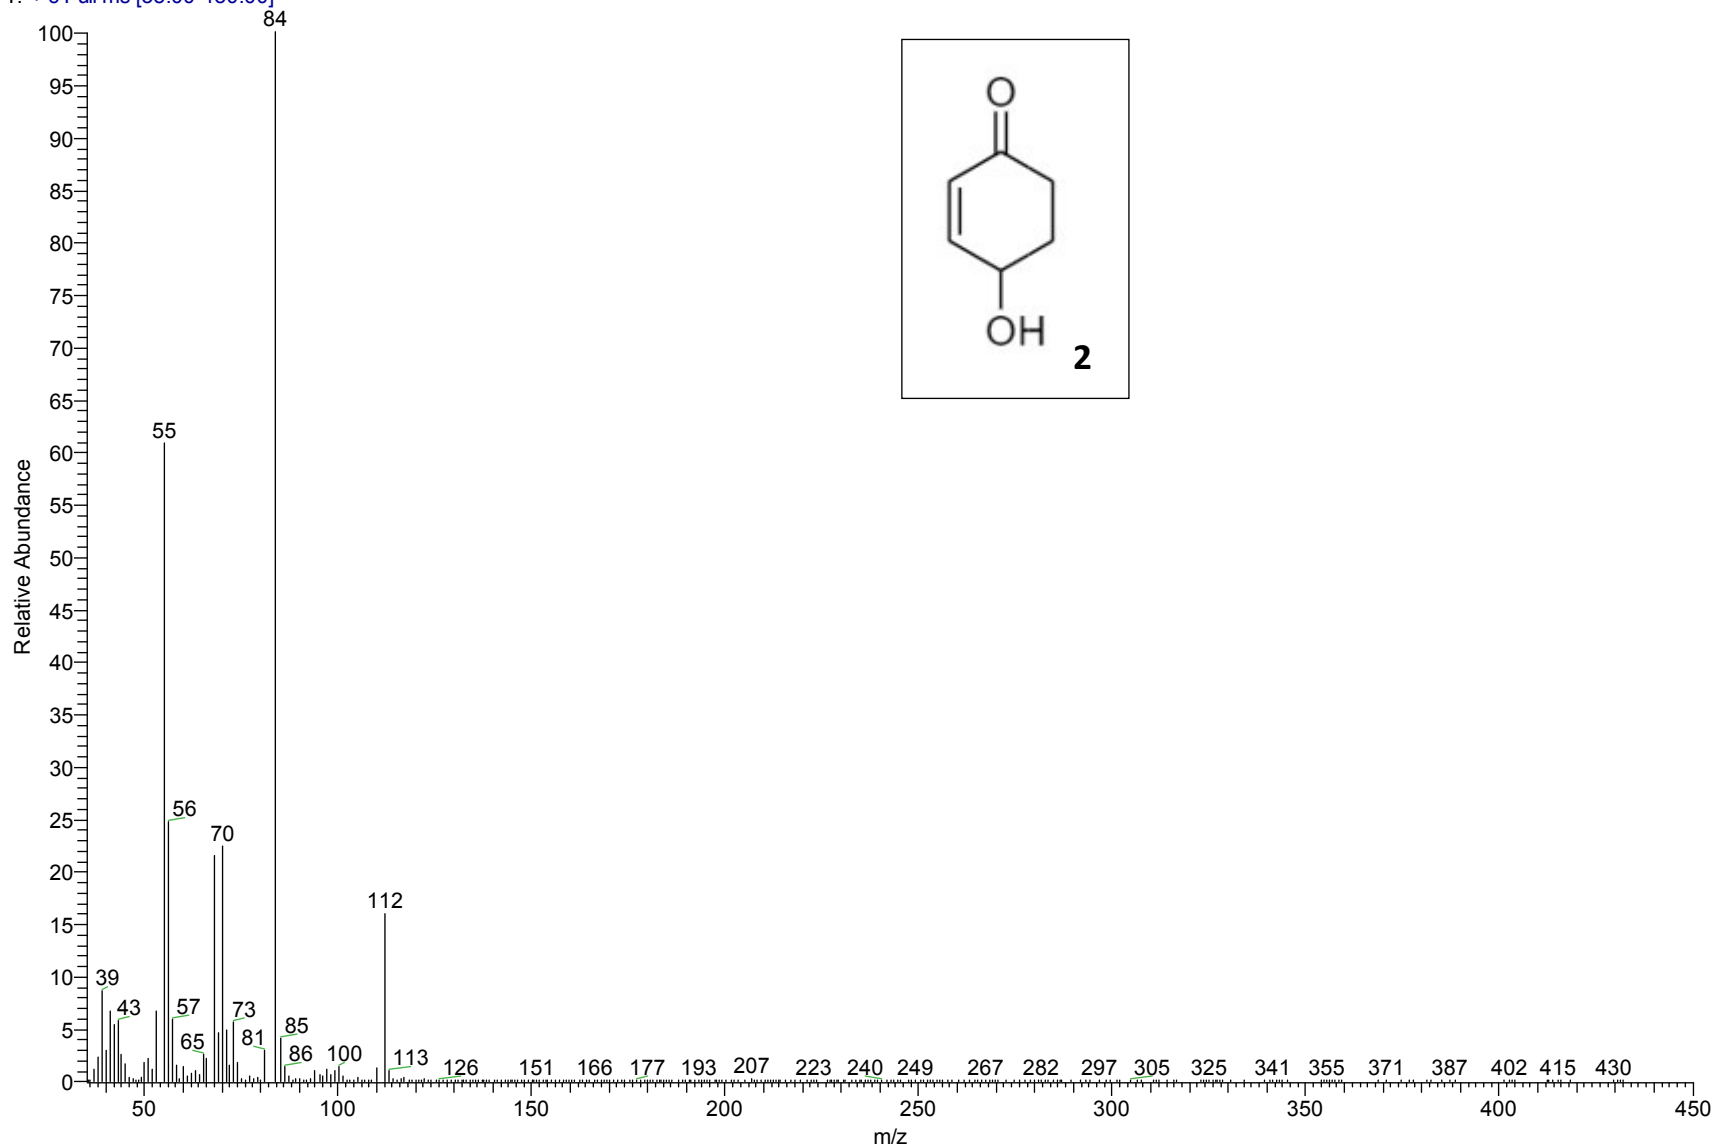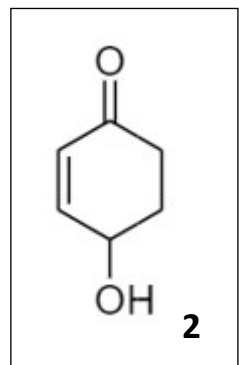

**C4, Reaction with 1,3-cyclohexadiene**

RT: 5.00 - 15.00

NL:  
8.99E7  
TIC MS  
quadrelli50

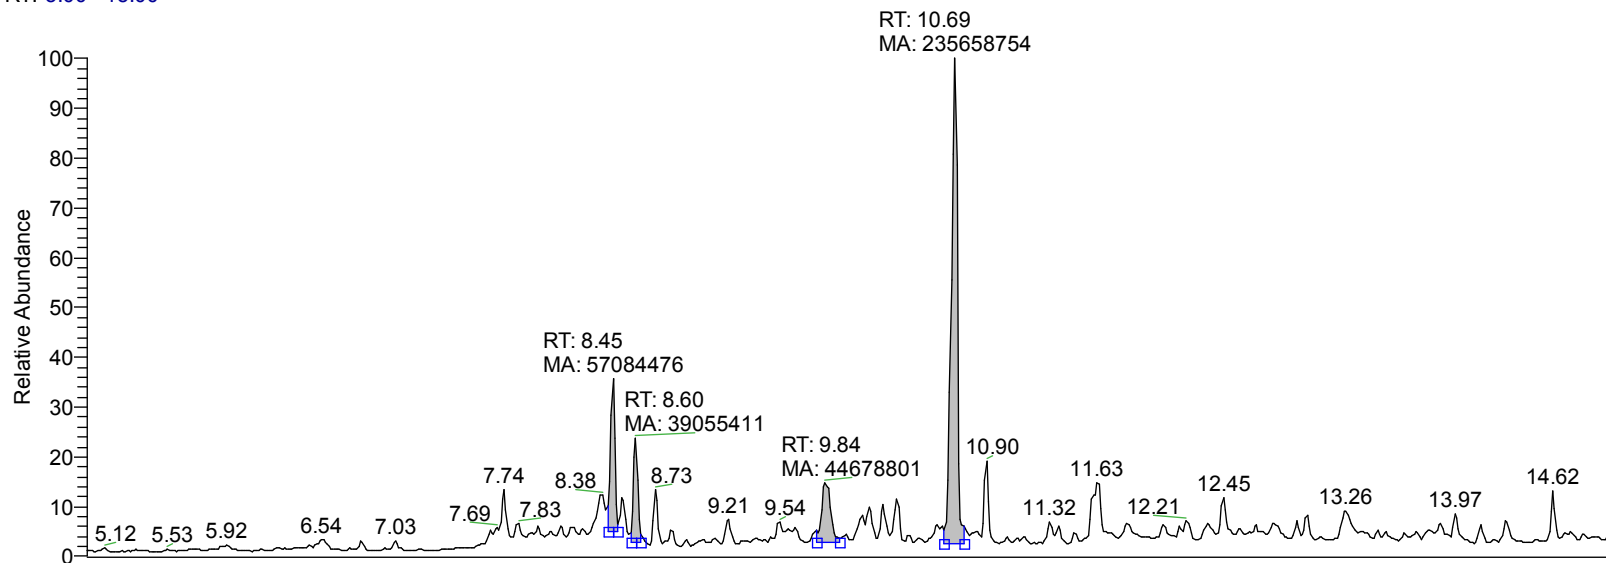

NL:  
1.78E8  
TIC MS  
quadrelli49

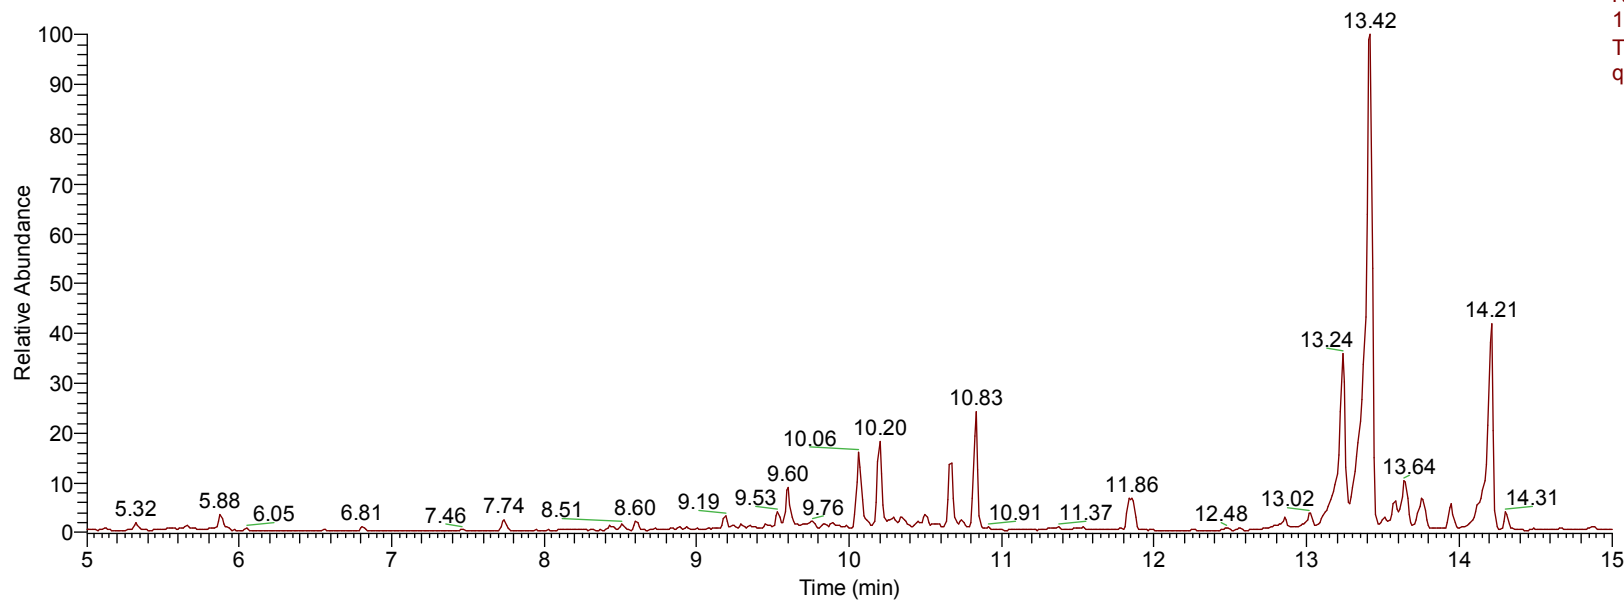

quadrelli50 #670 RT: 10.69 AV: 1 NL: 3.27E7  
T: + c Full ms [35.00-450.00]

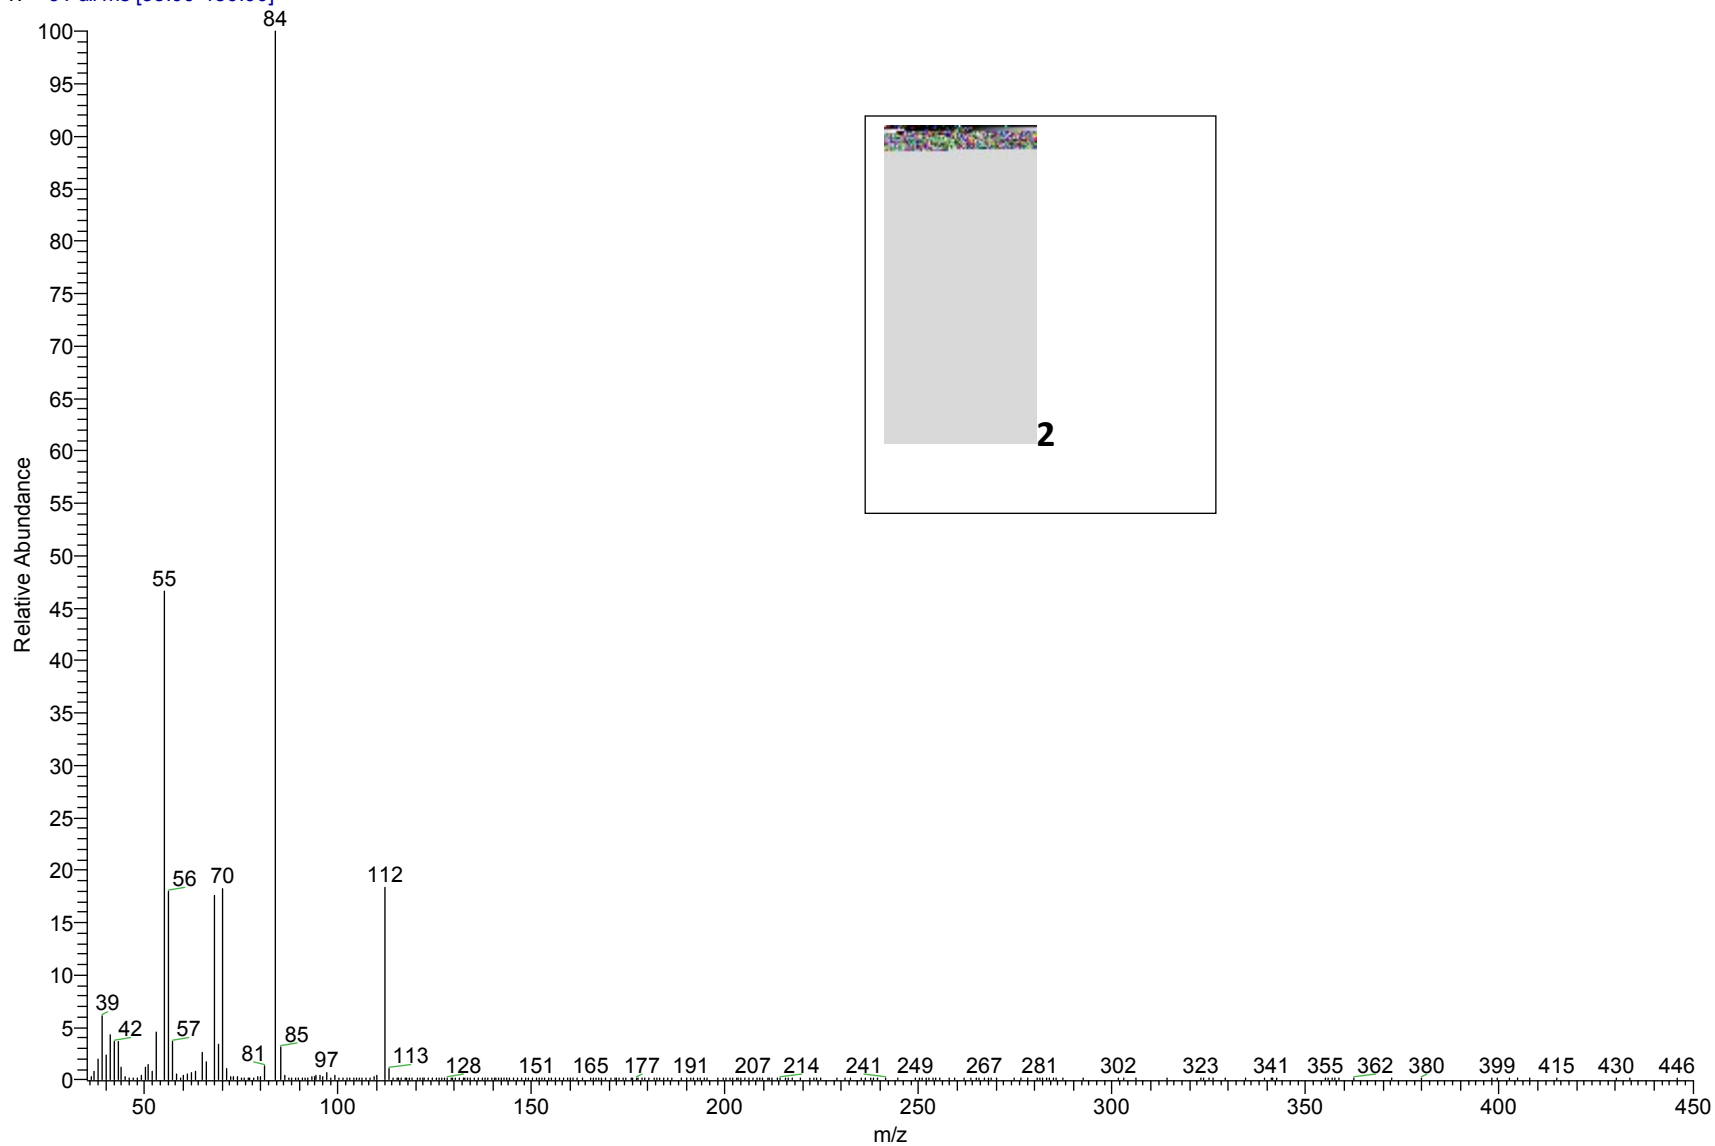

### C1, Reaction with cyclopentadiene

RT: 10.00 - 18.00

NL:  
7.89E7  
TIC MS  
quadrelli32

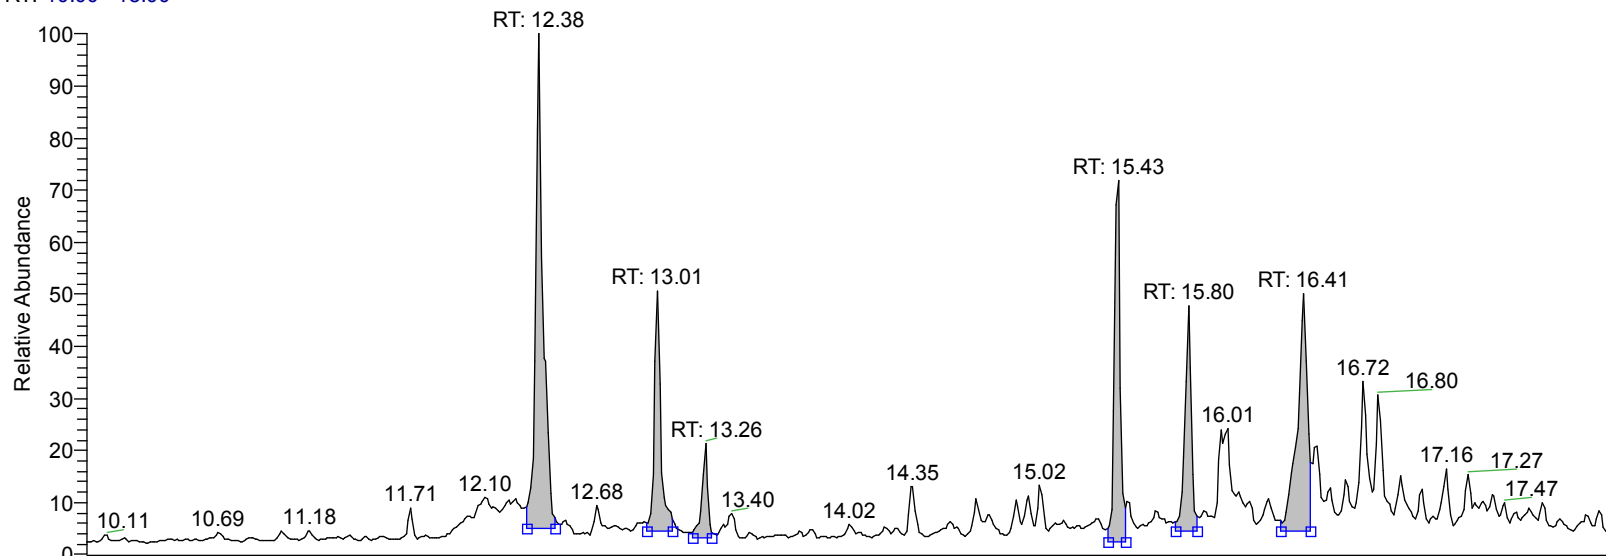

NL:  
1.03E8  
TIC MS  
quadrelli56

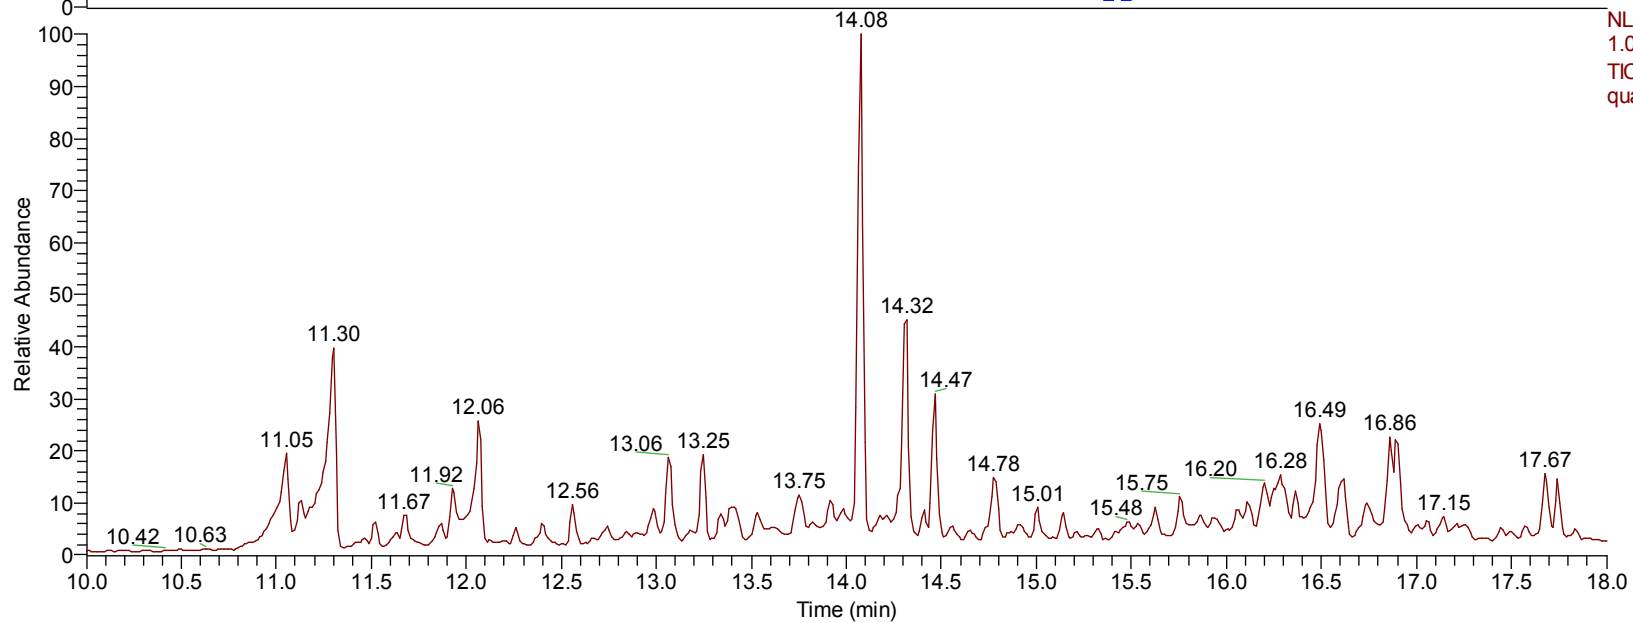

quadrelli32 #871 RT: 13.01 AV: 1 NL: 6.66E6  
T: + c Full ms [35.00-450.00]

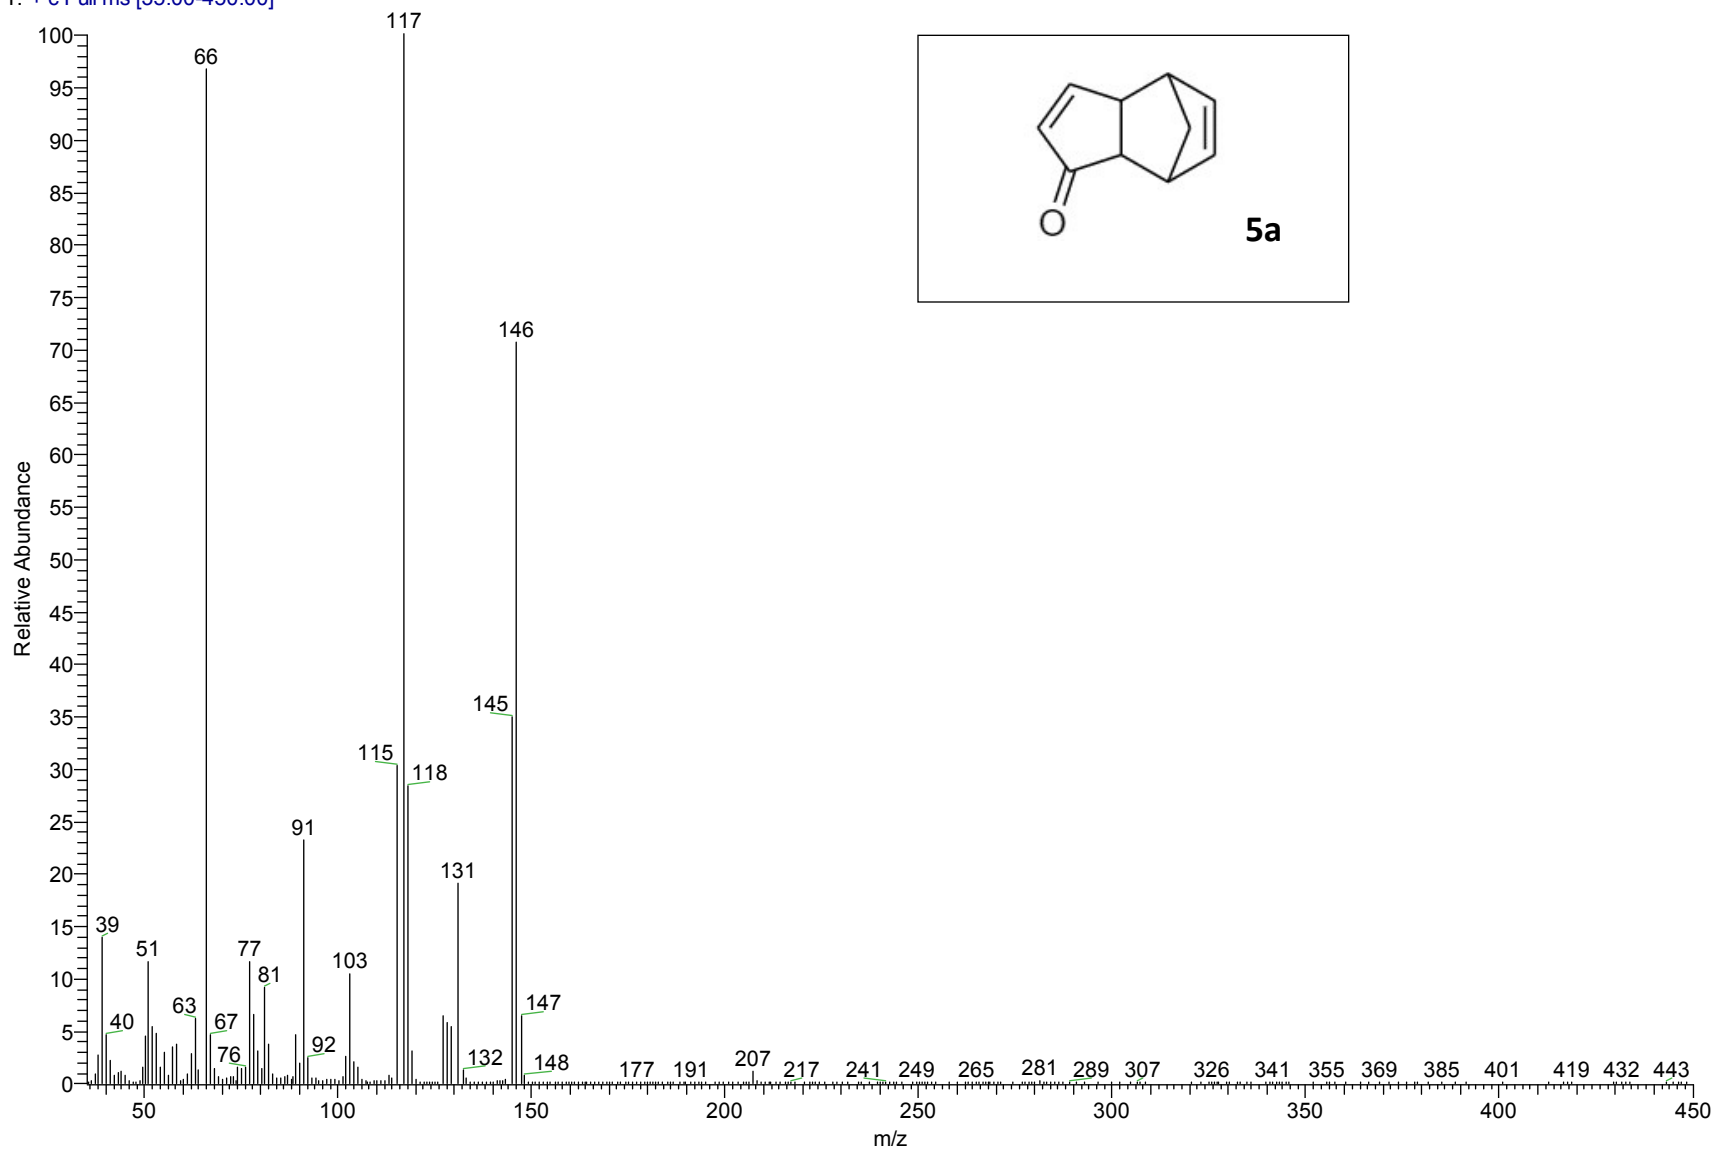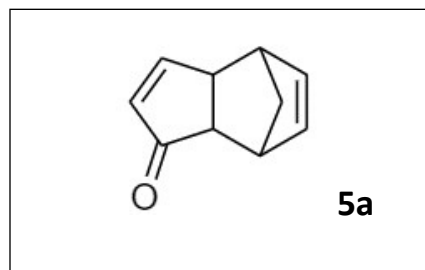

quadrelli32 #893 RT: 13.26 AV: 1 NL: 3.09E6  
T: + c Full ms [35.00-450.00]

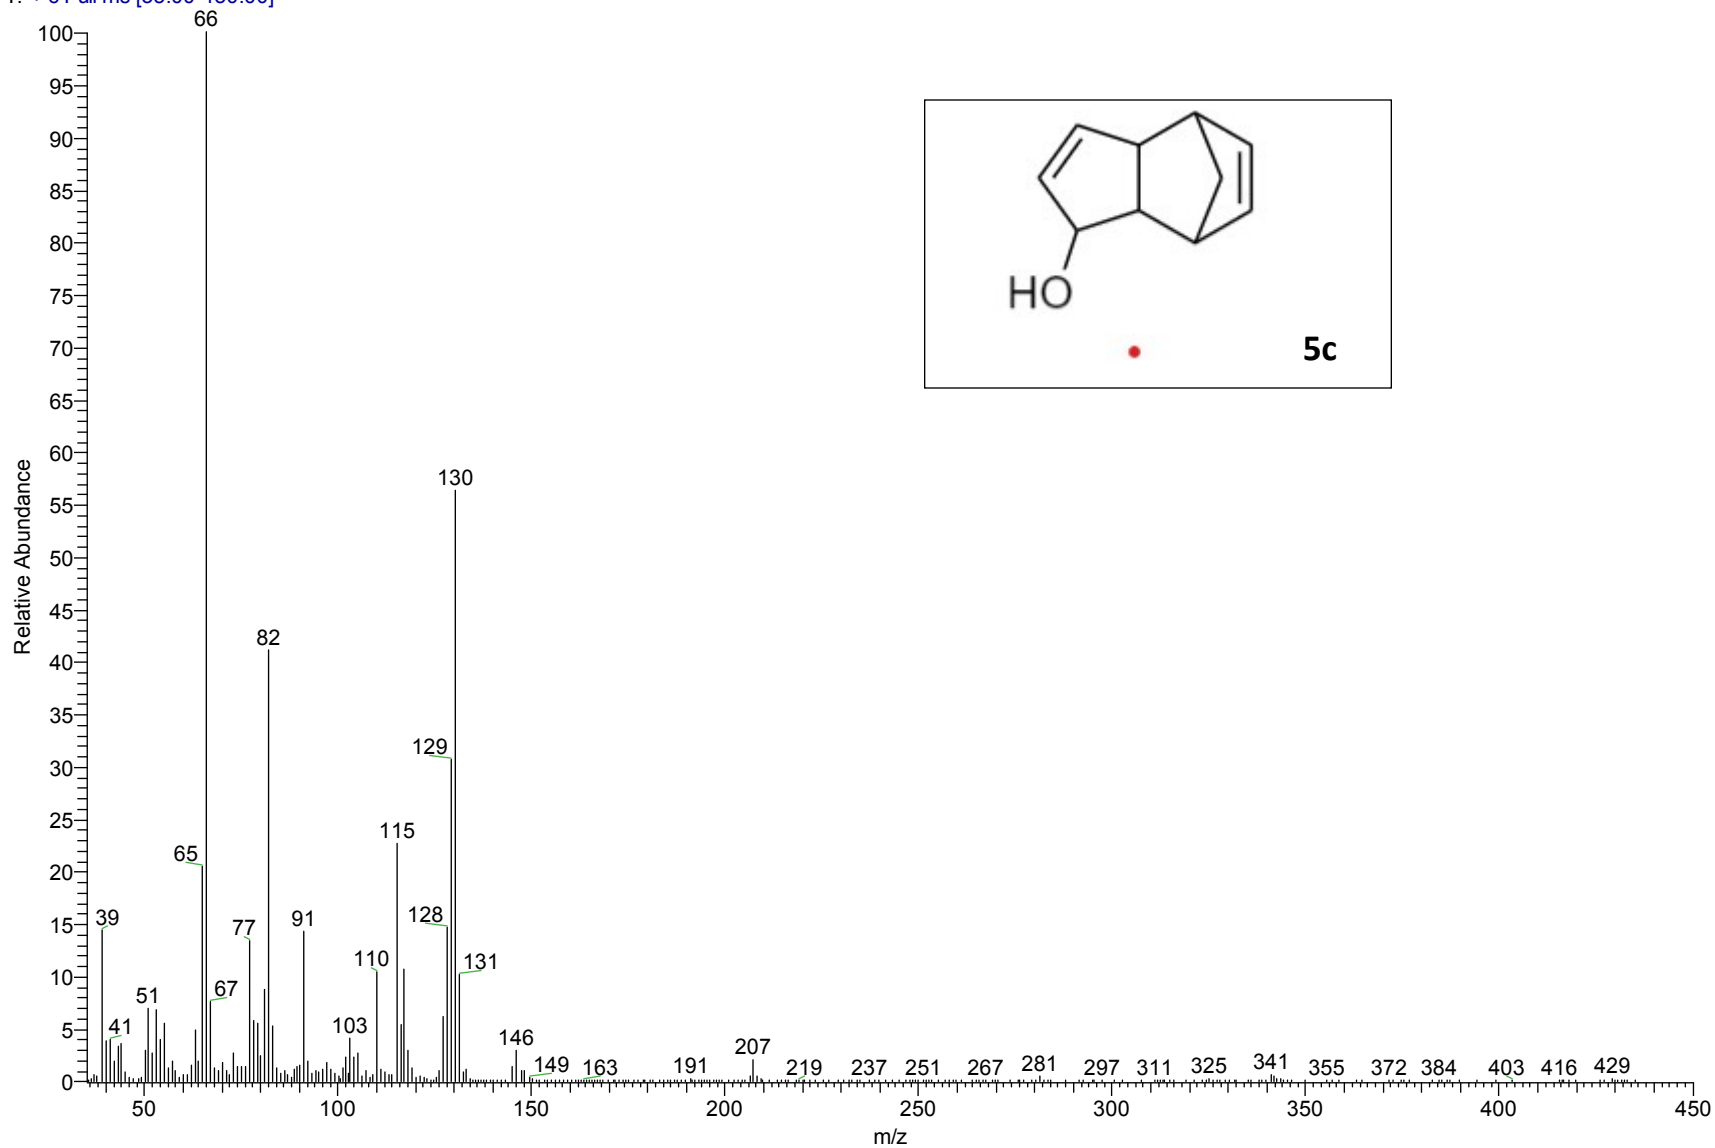

quadrelli32 #1082 RT: 15.43 AV: 1 NL: 8.51E6  
T: + c Full ms [35.00-450.00]

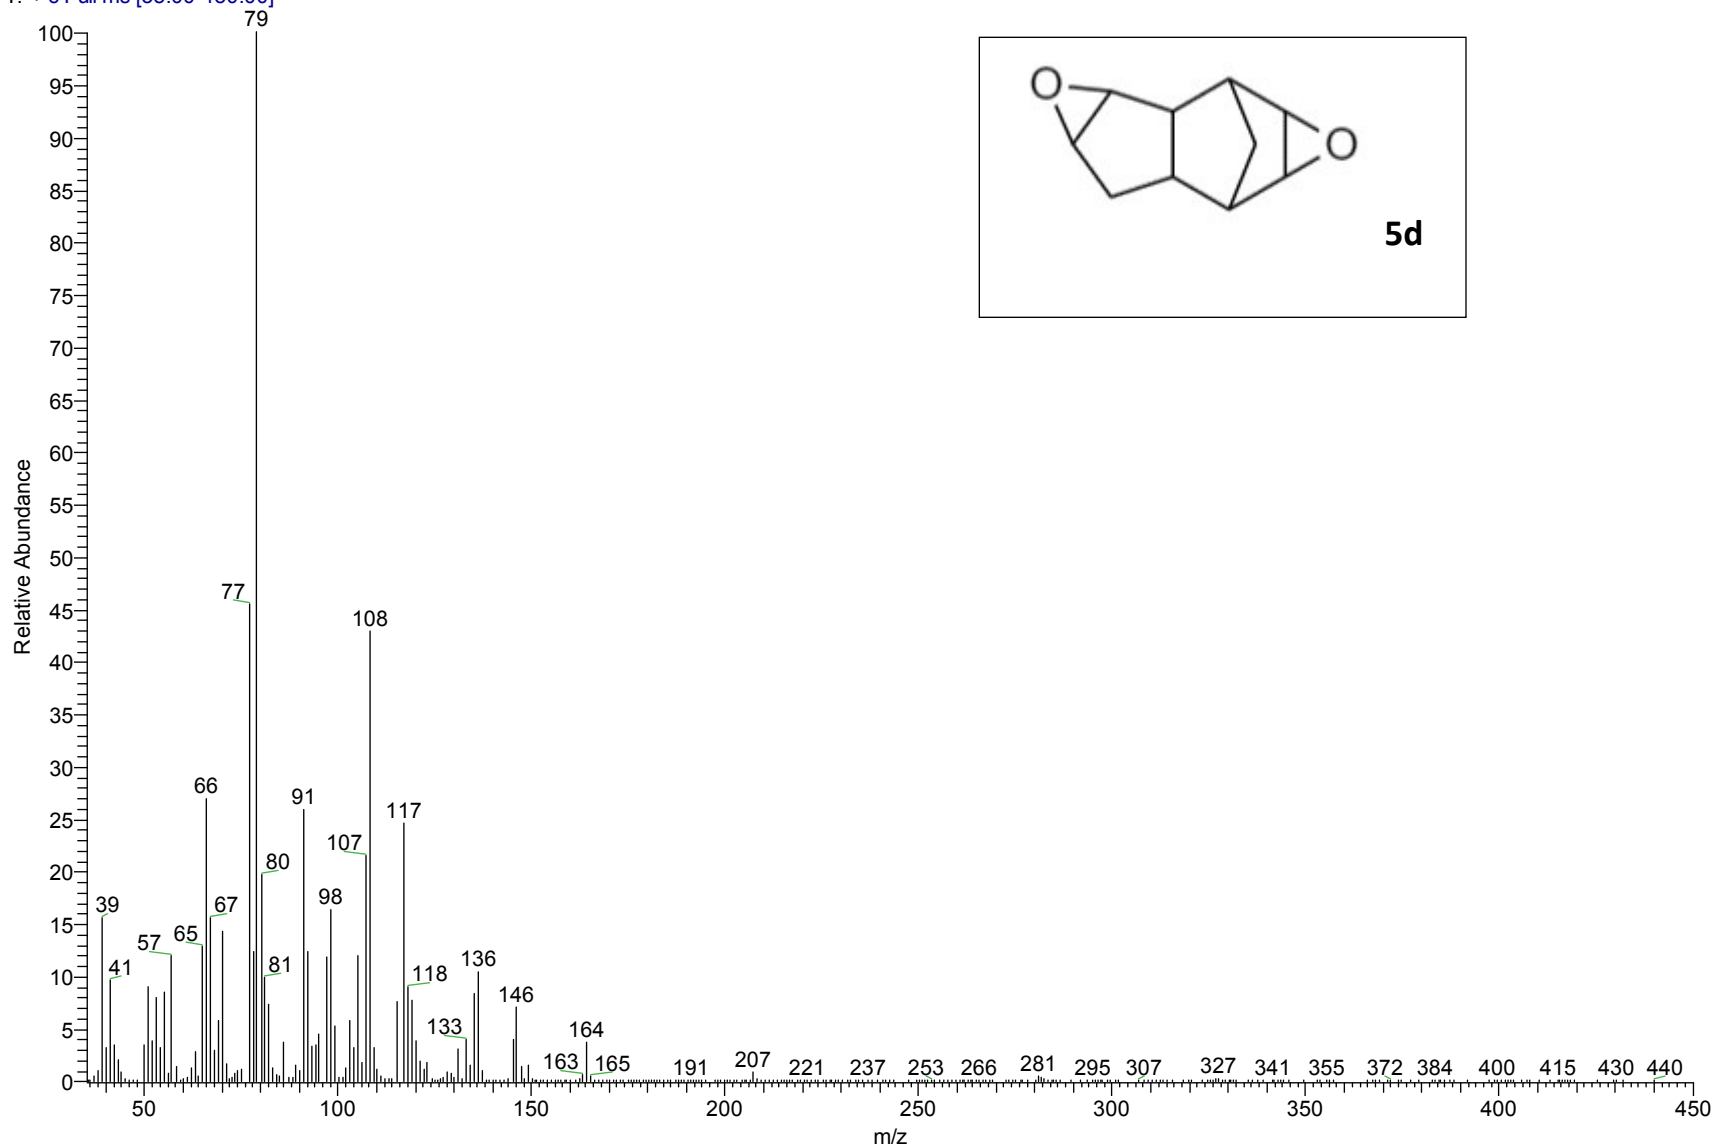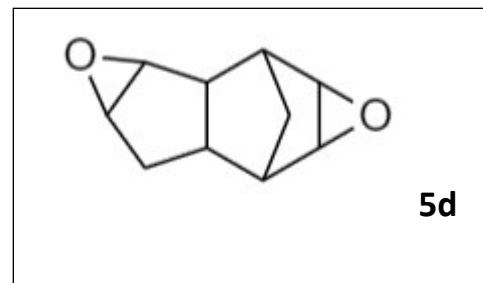

quadrelli32 #1114 RT: 15.80 AV: 1 NL: 6.11E6  
T: + c Full ms [35.00-450.00]

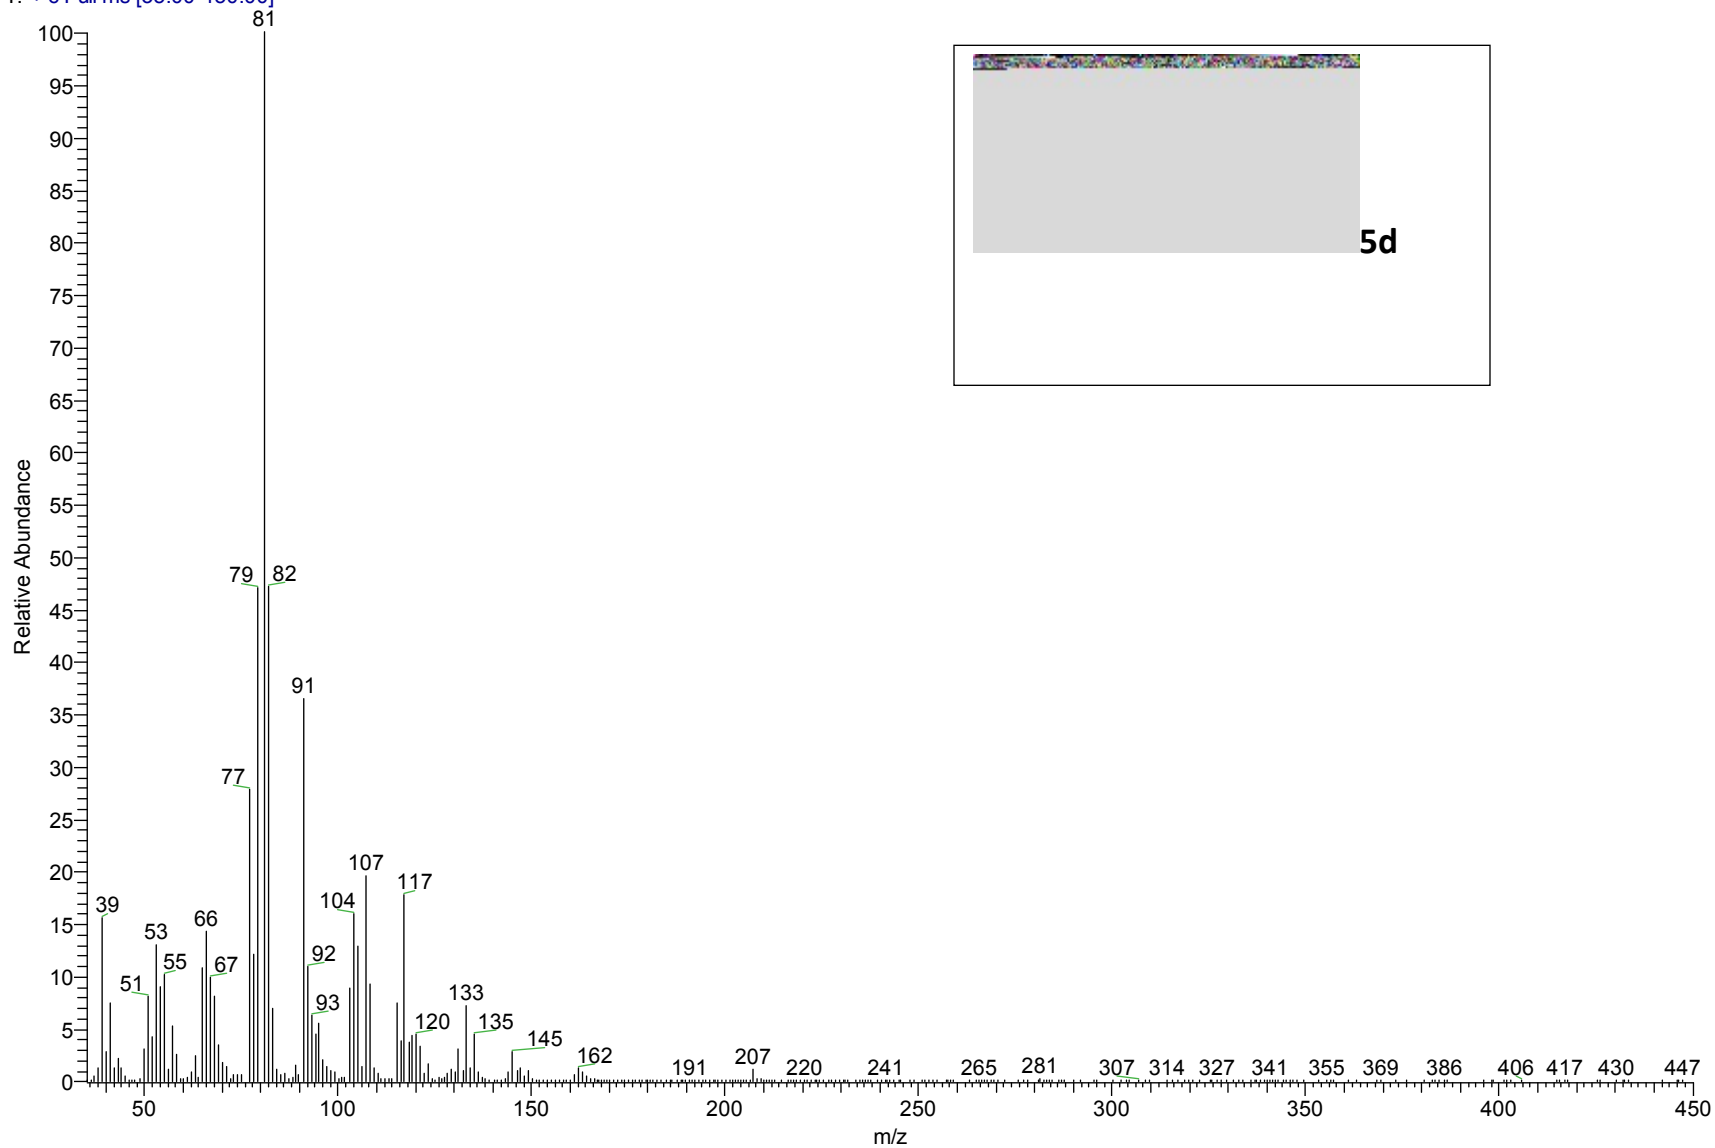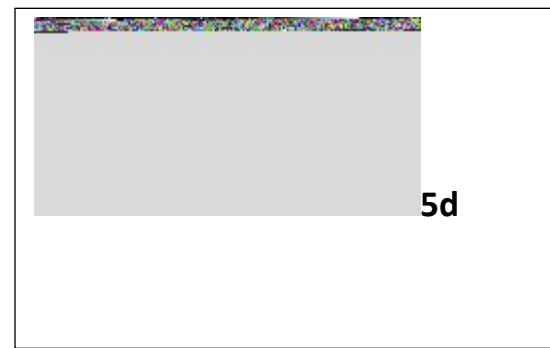



quadrelli32 #1167 RT: 16.41 AV: 1 NL: 3.62E6  
T: + c Full ms [35.00-450.00]

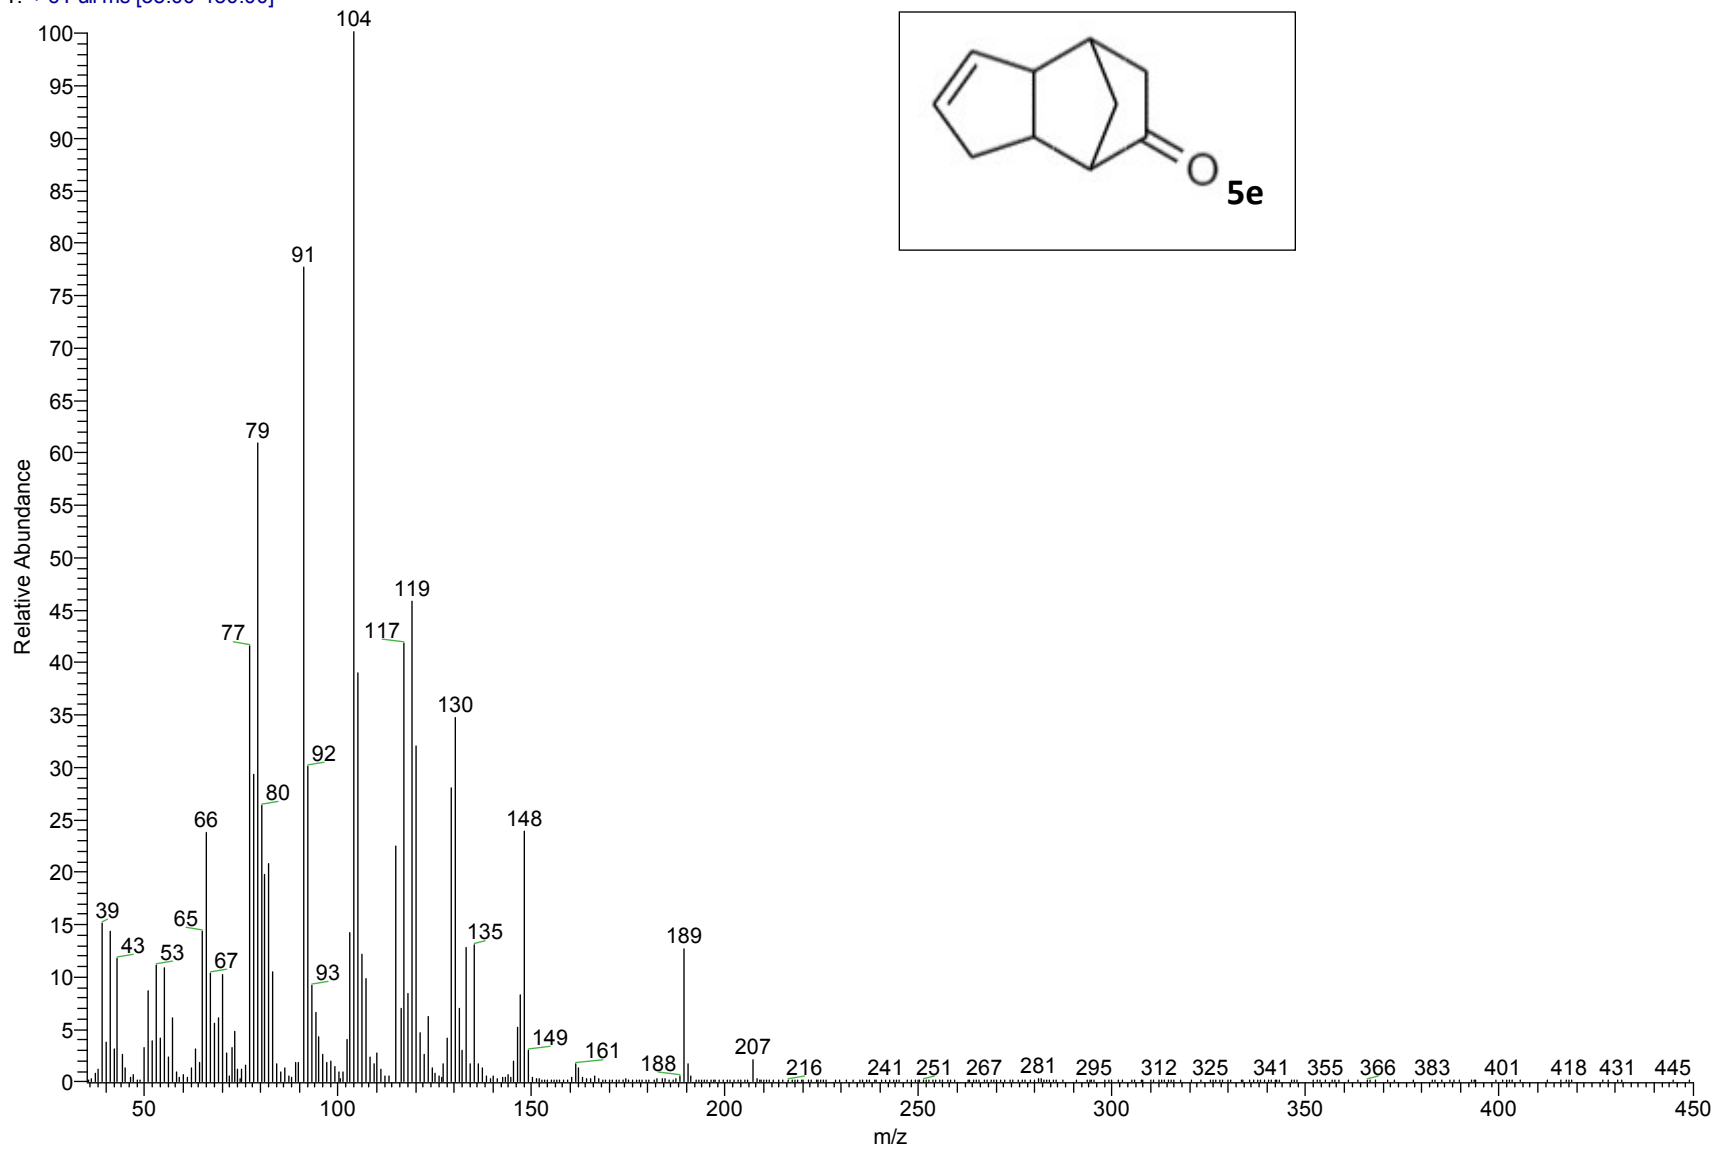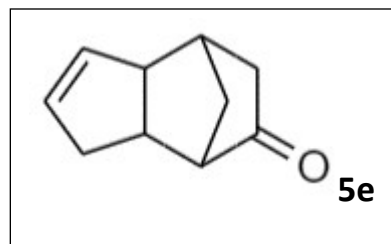

## C2, Reaction with cyclopentadiene

RT: 10.00 - 18.00

NL:  
9.30E7  
TIC MS  
quadrelli37

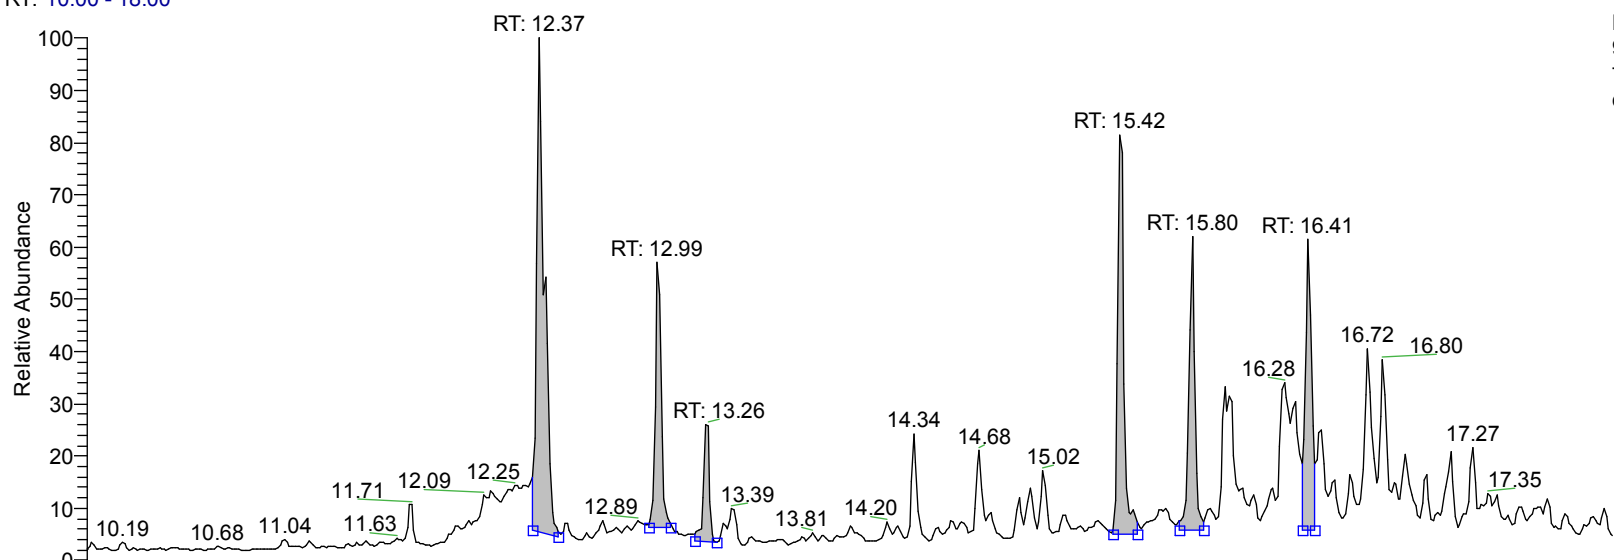

NL:  
2.15E8  
TIC MS  
quadrelli57

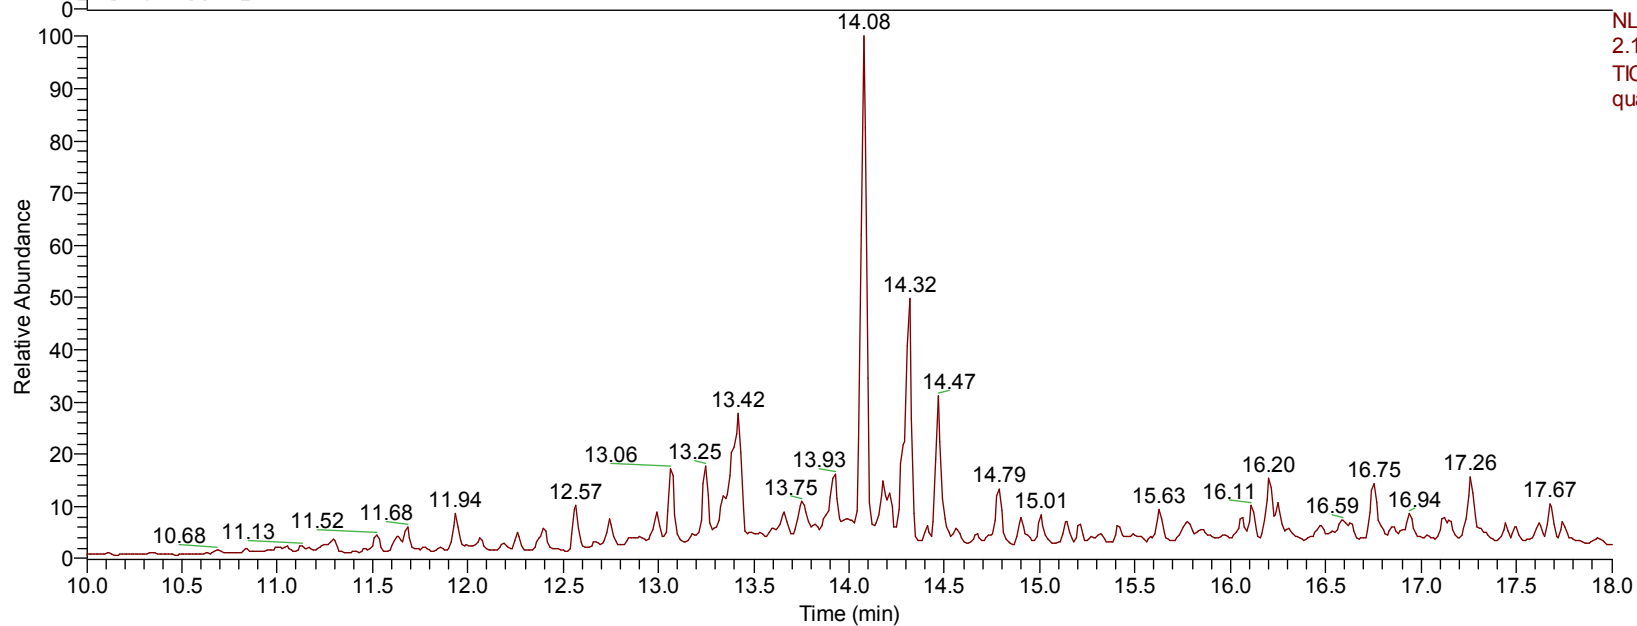

quadrelli37 #870 RT: 12.99 AV: 1 NL: 8.70E6  
T: + c Full ms [35.00-450.00]

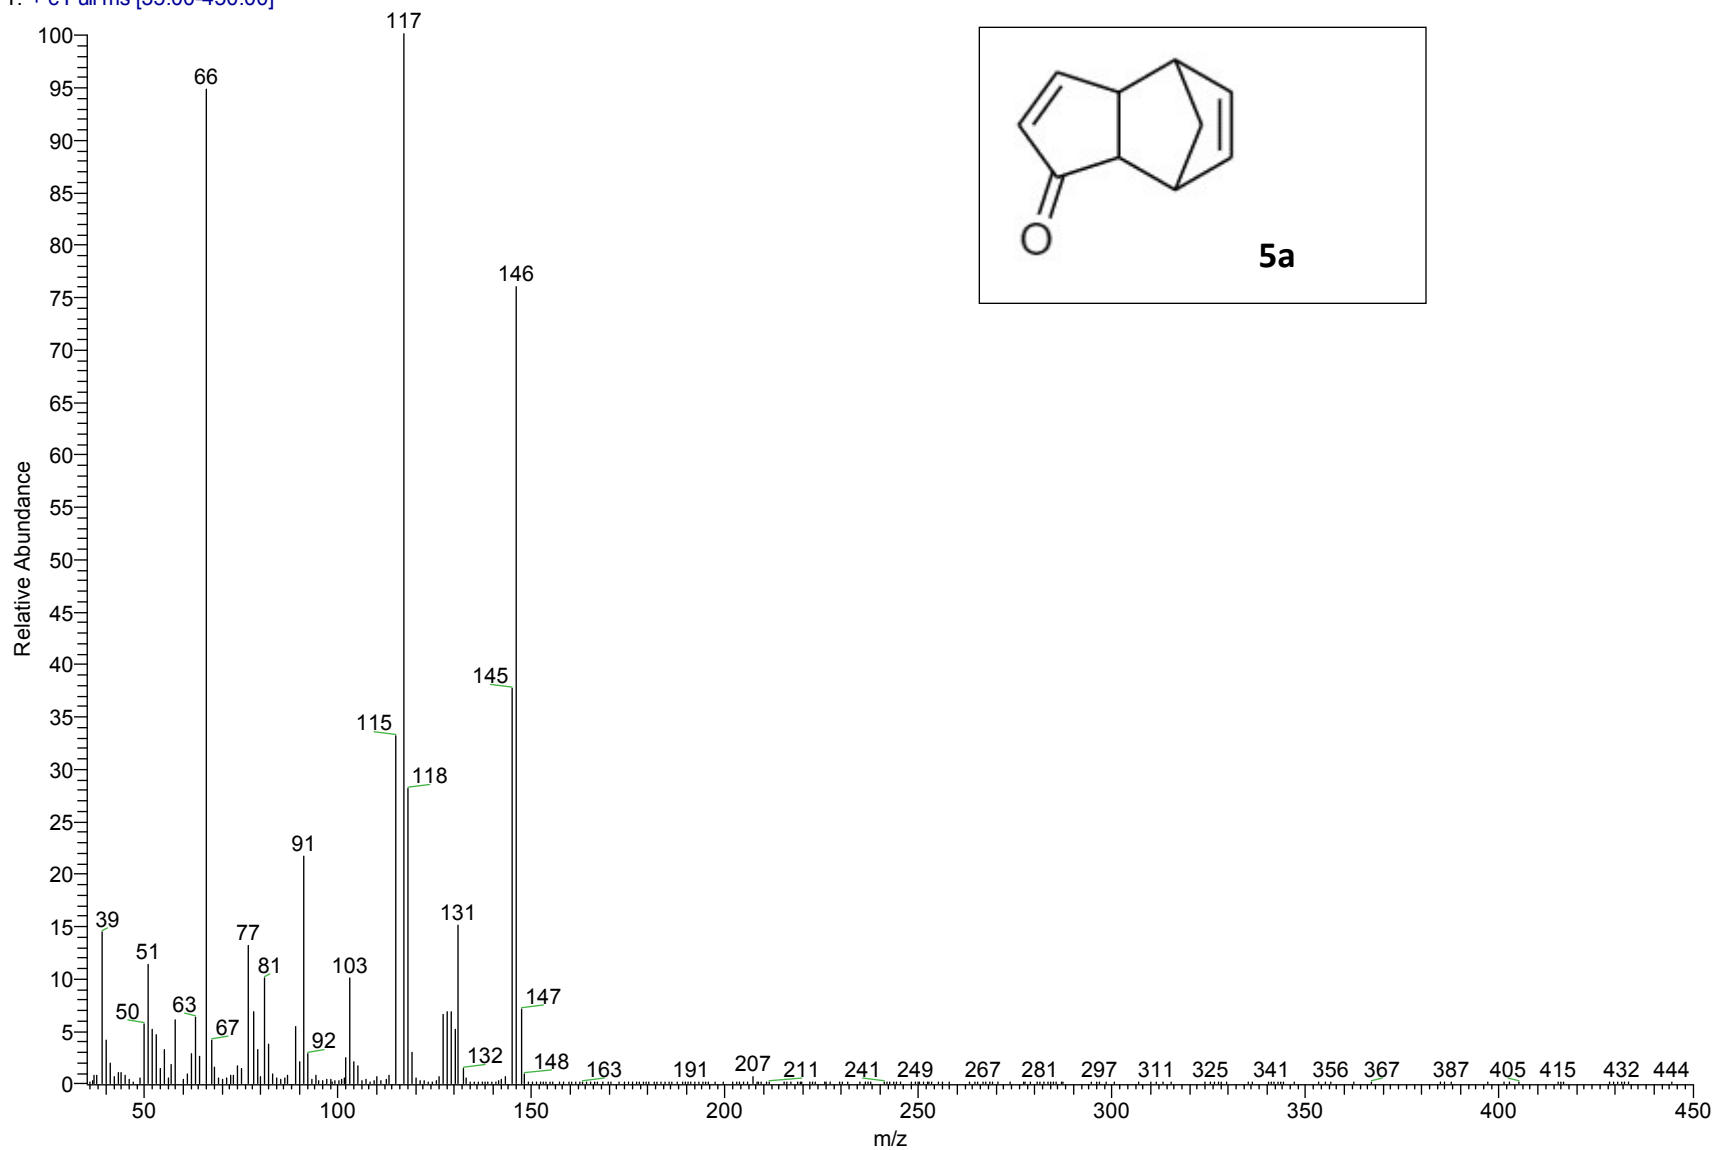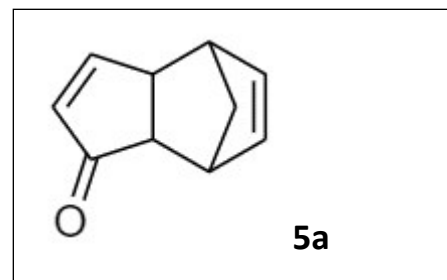

quadrelli37 #893 RT: 13.26 AV: 1 NL: 5.99E6  
T: + c Full ms [35.00-450.00]

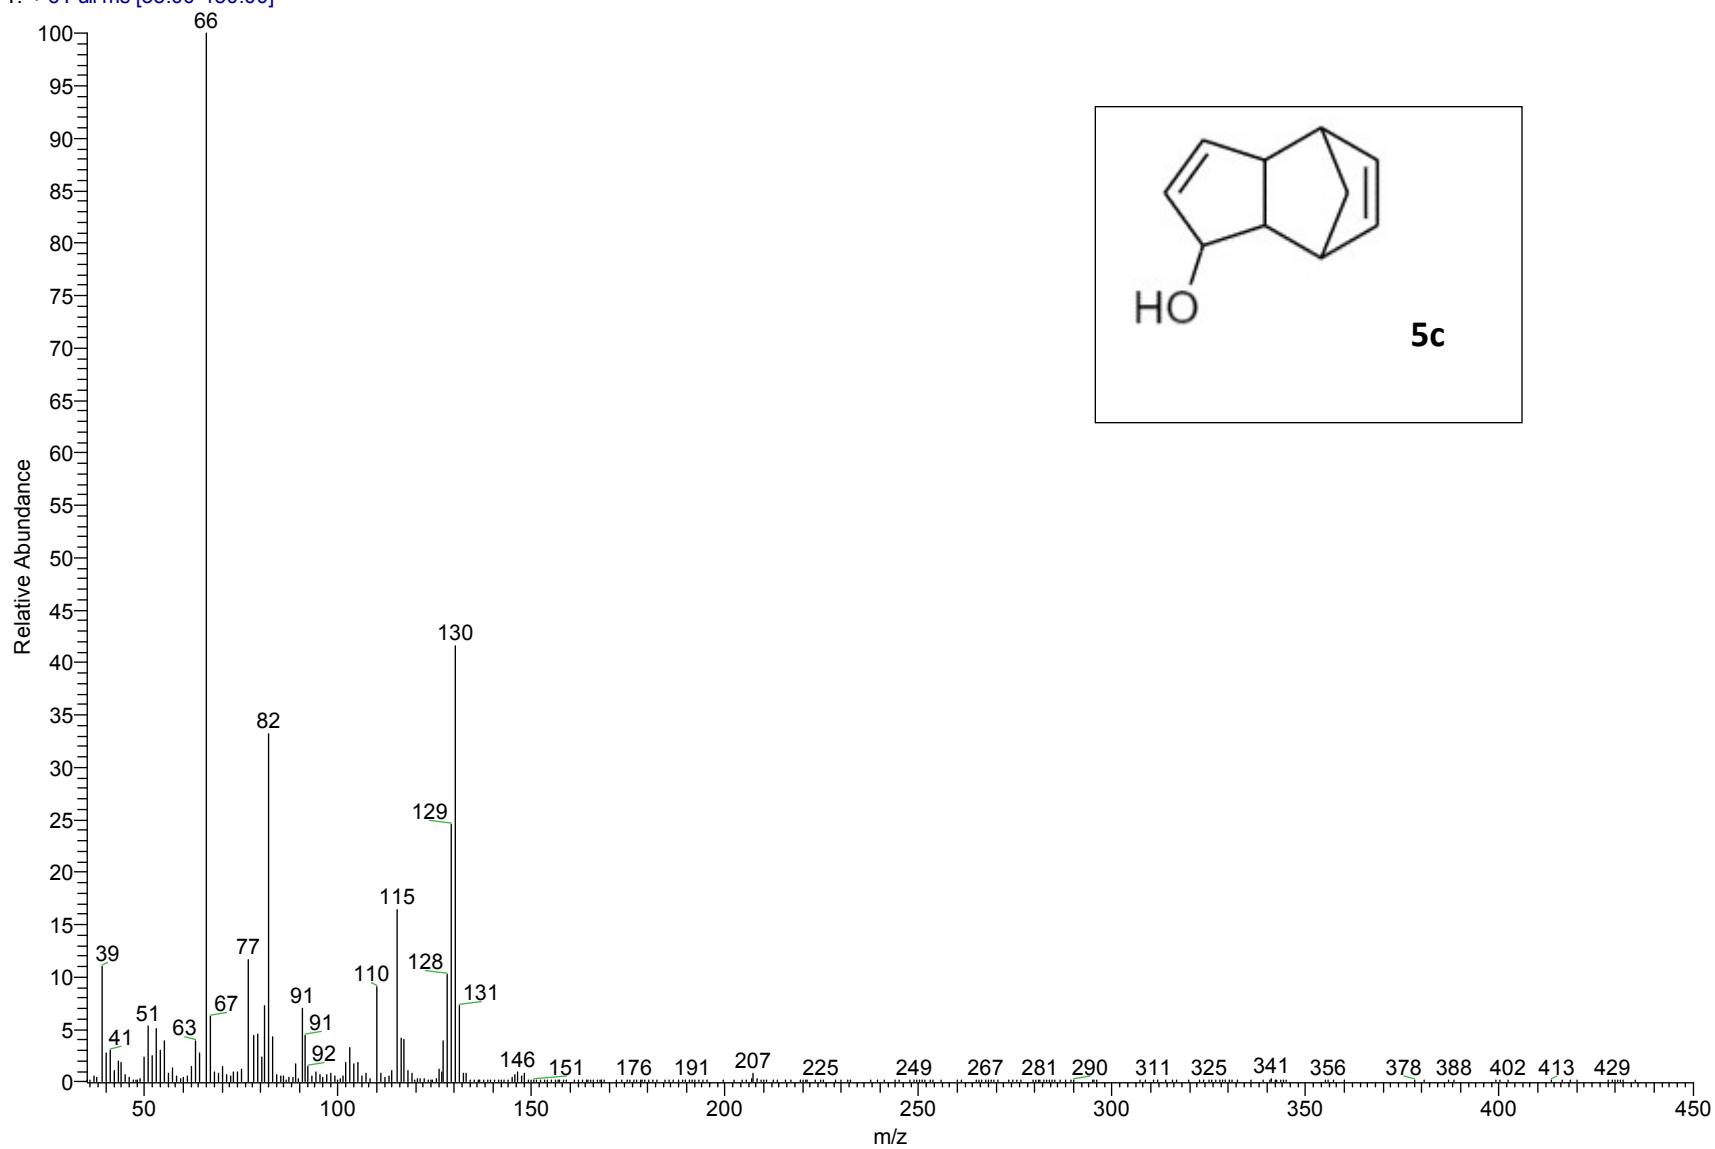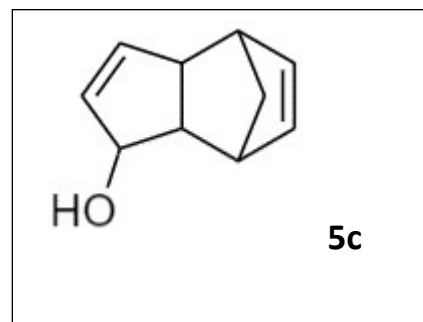

quadrelli37 #1081 RT: 15.42 AV: 1 NL: 1.07E7  
T: + c Full ms [35.00-450.00]

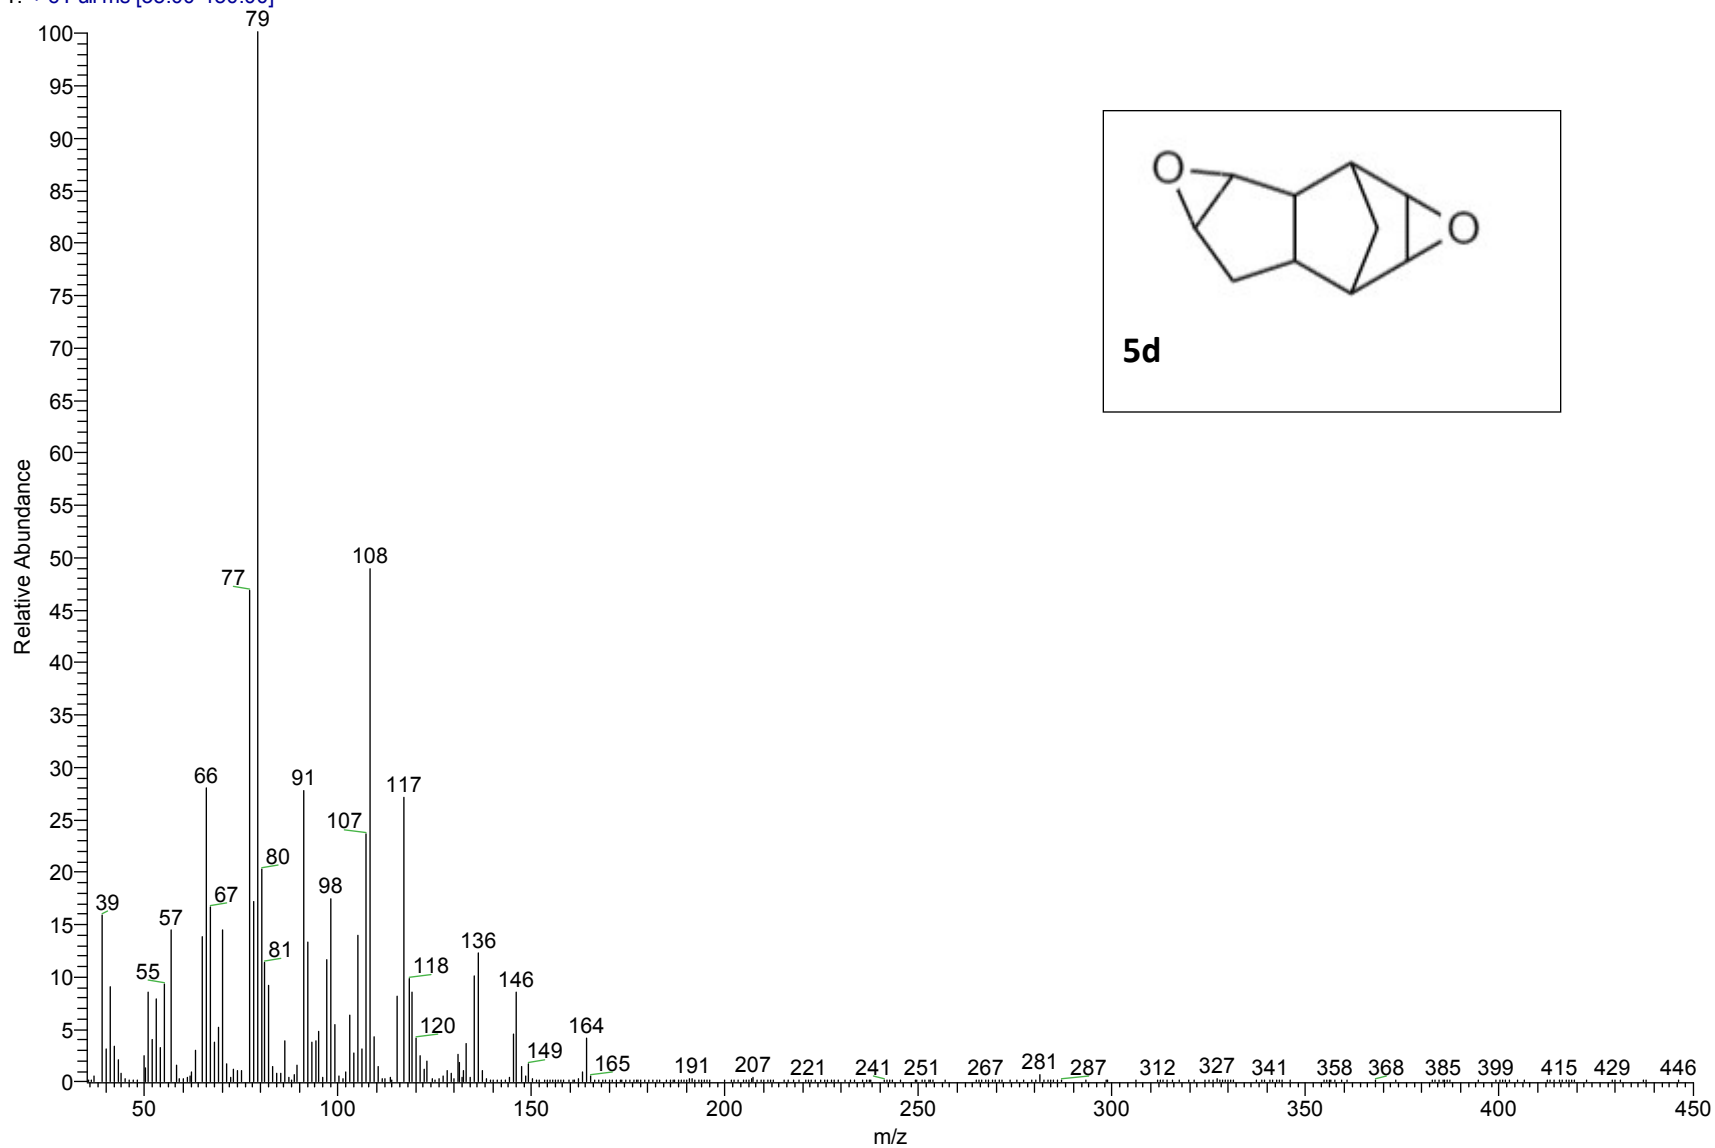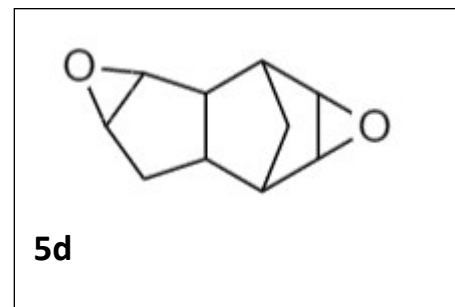

quadrelli37 #1114 RT: 15.80 AV: 1 NL: 9.45E6  
T: + c Full ms [35.00-450.00]

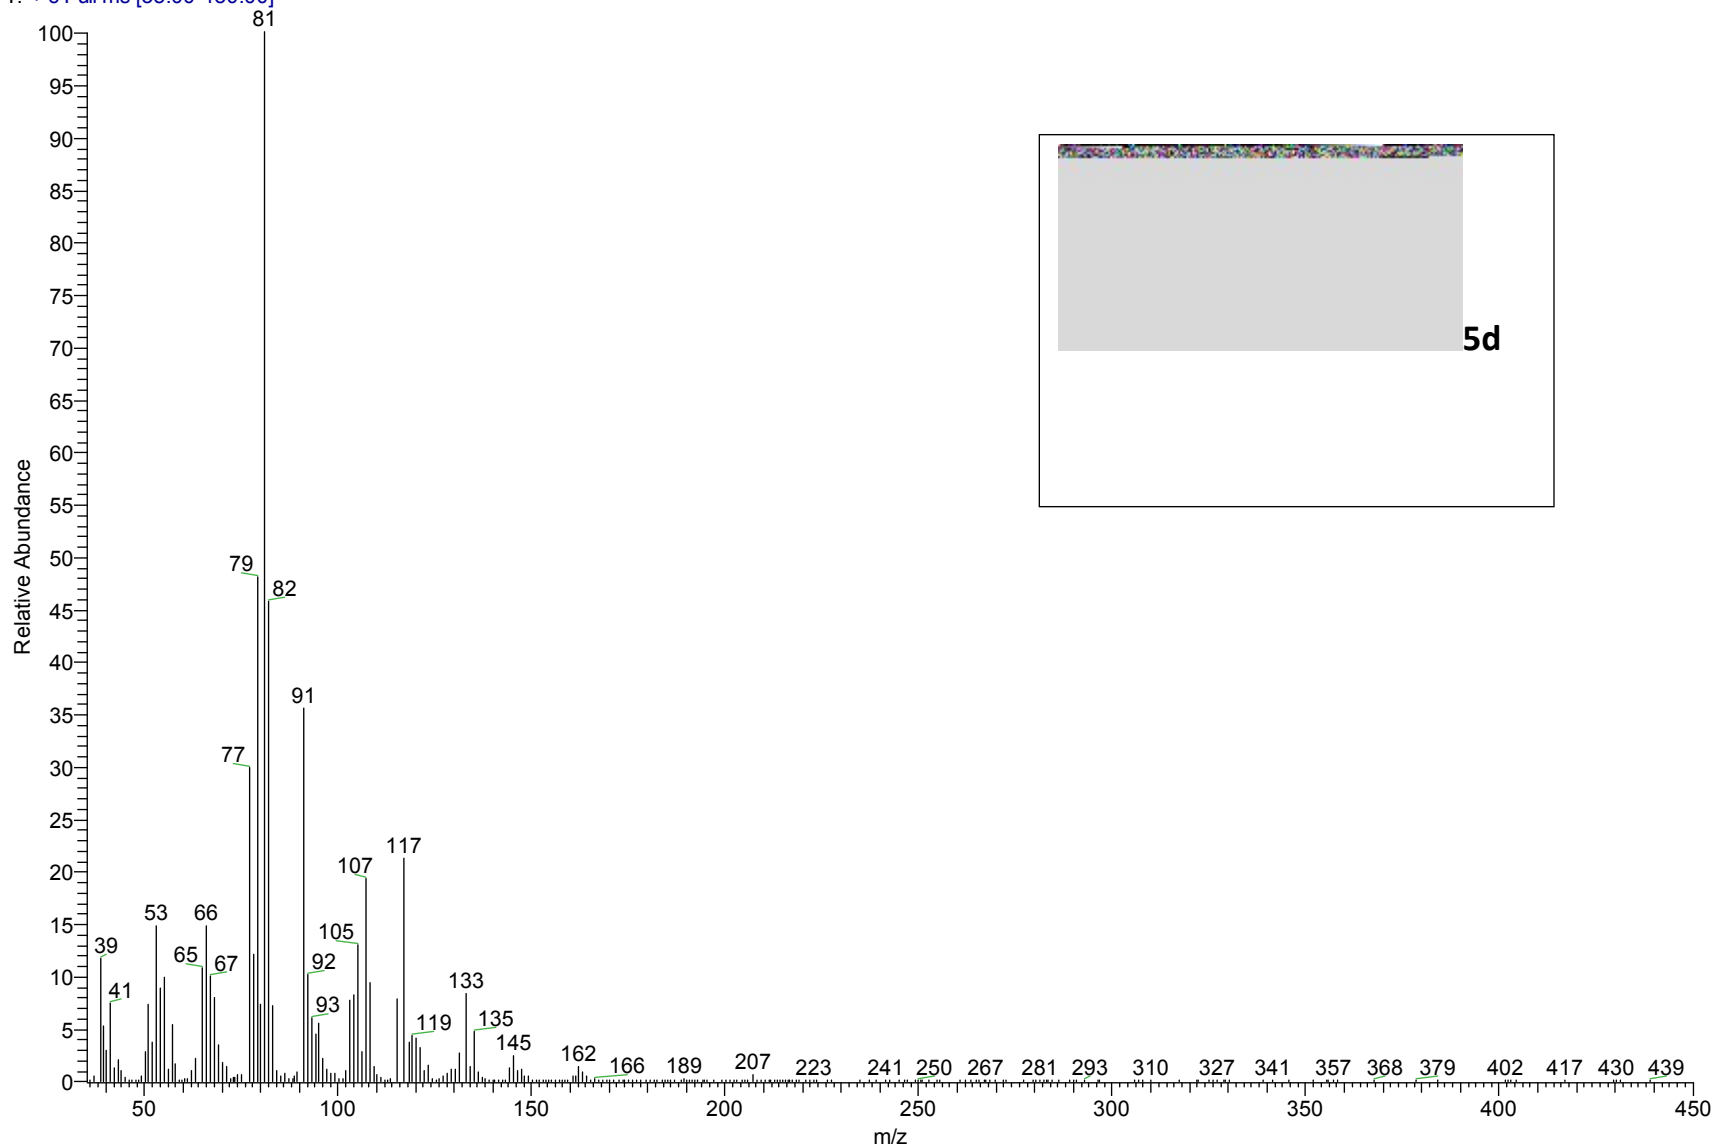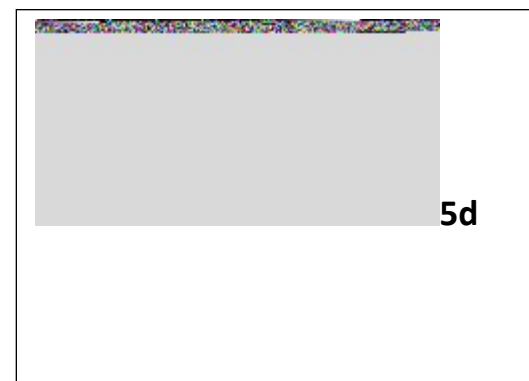

quadrelli37 #1167 RT: 16.41 AV: 1 NL: 5.50E6  
T: + c Full ms [35.00-450.00]

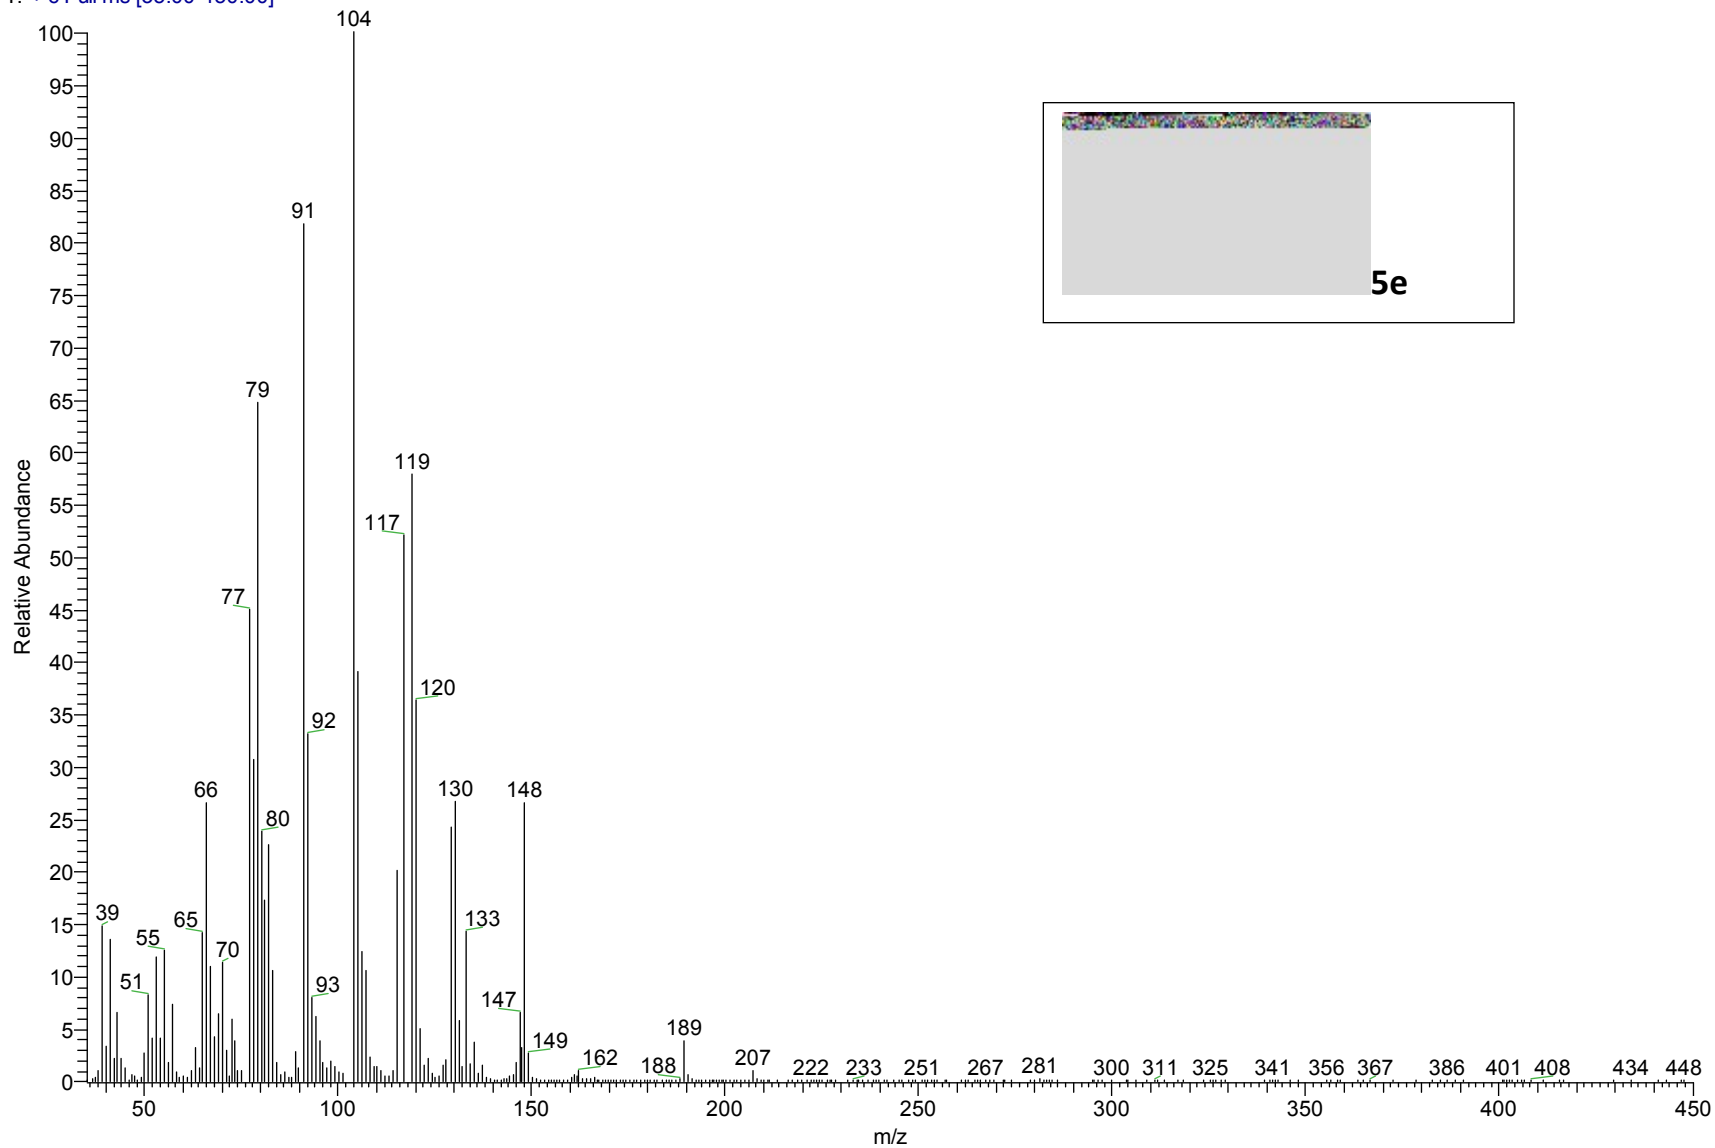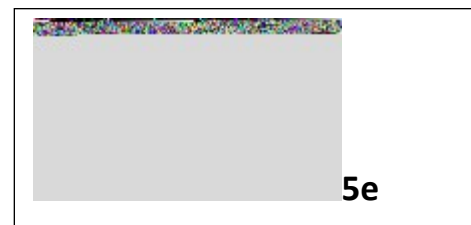

### C3, reactions with cyclopentadiene

RT: 10.00 - 18.00

NL:  
1.08E8  
TIC MS  
quadrelli39

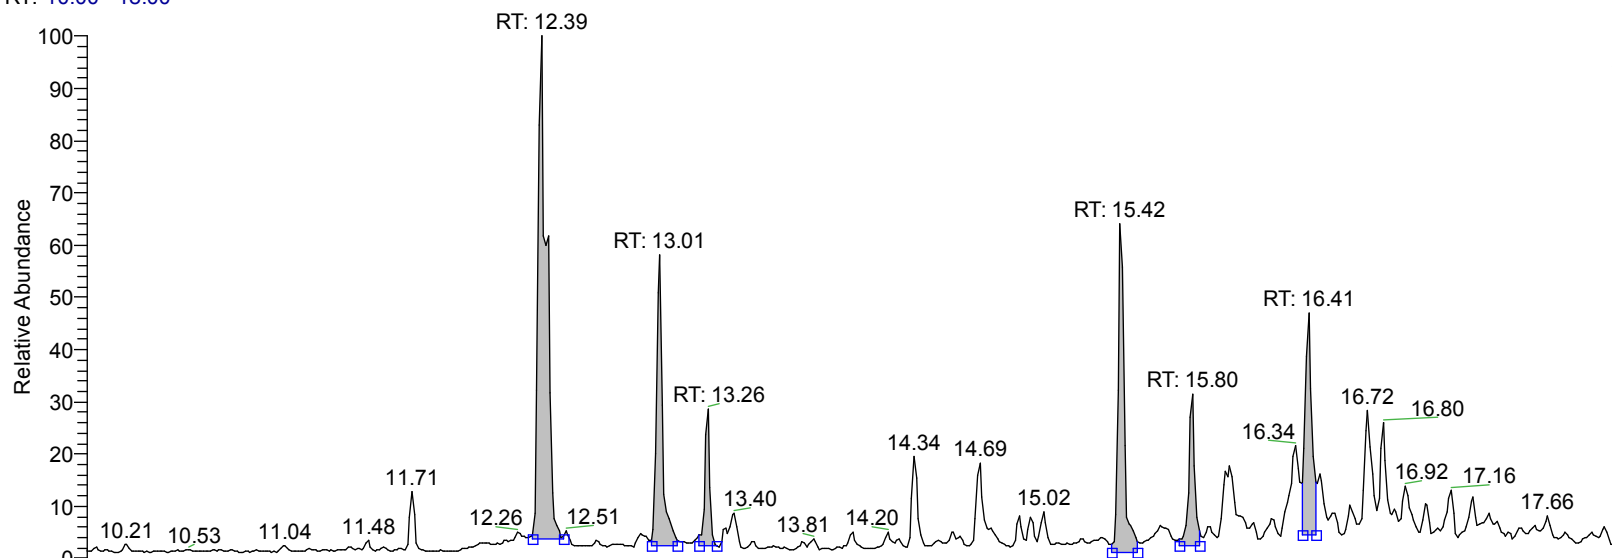

NL:  
5.50E7  
TIC MS  
quadrelli58

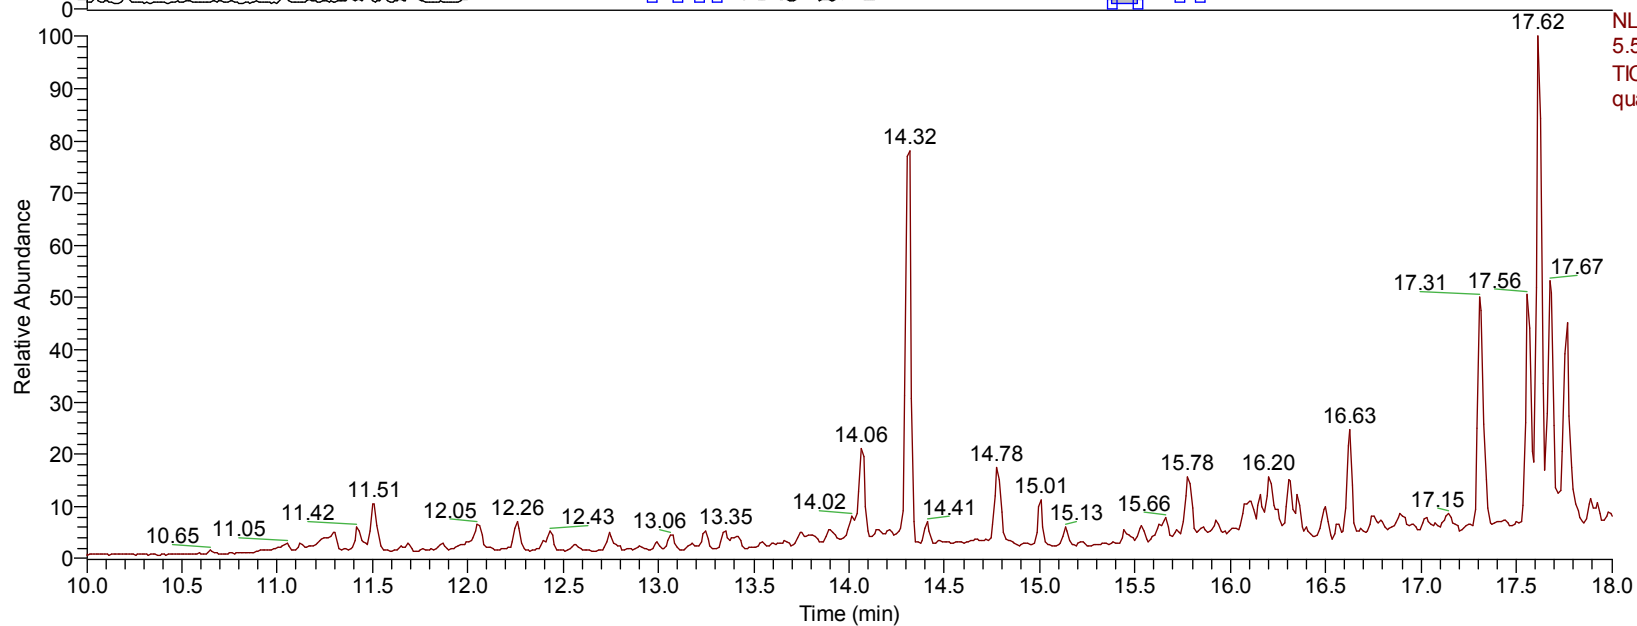



quadrelli39 #871 RT: 13.01 AV: 1 NL: 1.08E7  
T: + c Full ms [35.00-450.00]

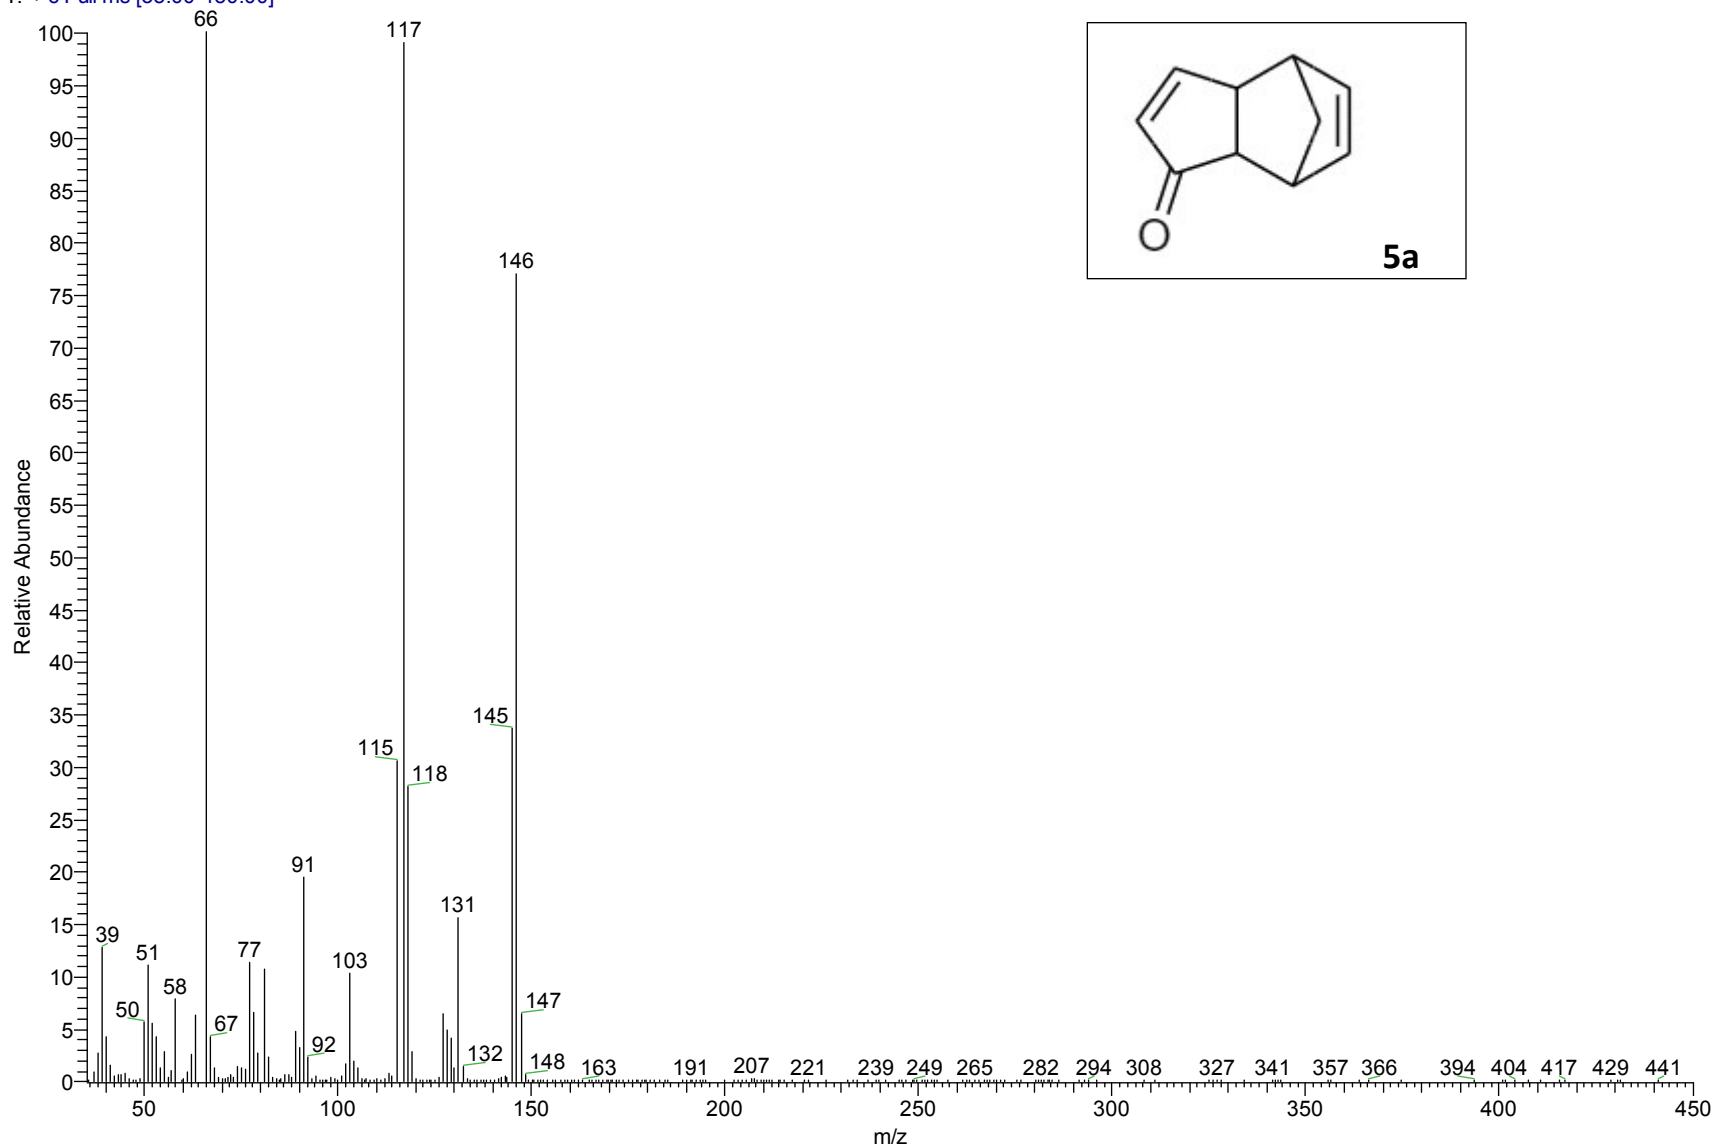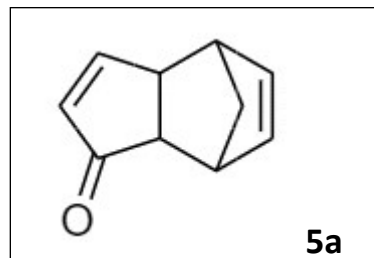

quadrelli39 #893 RT: 13.26 AV: 1 NL: 8.18E6  
T: + c Full ms [35.00-450.00]

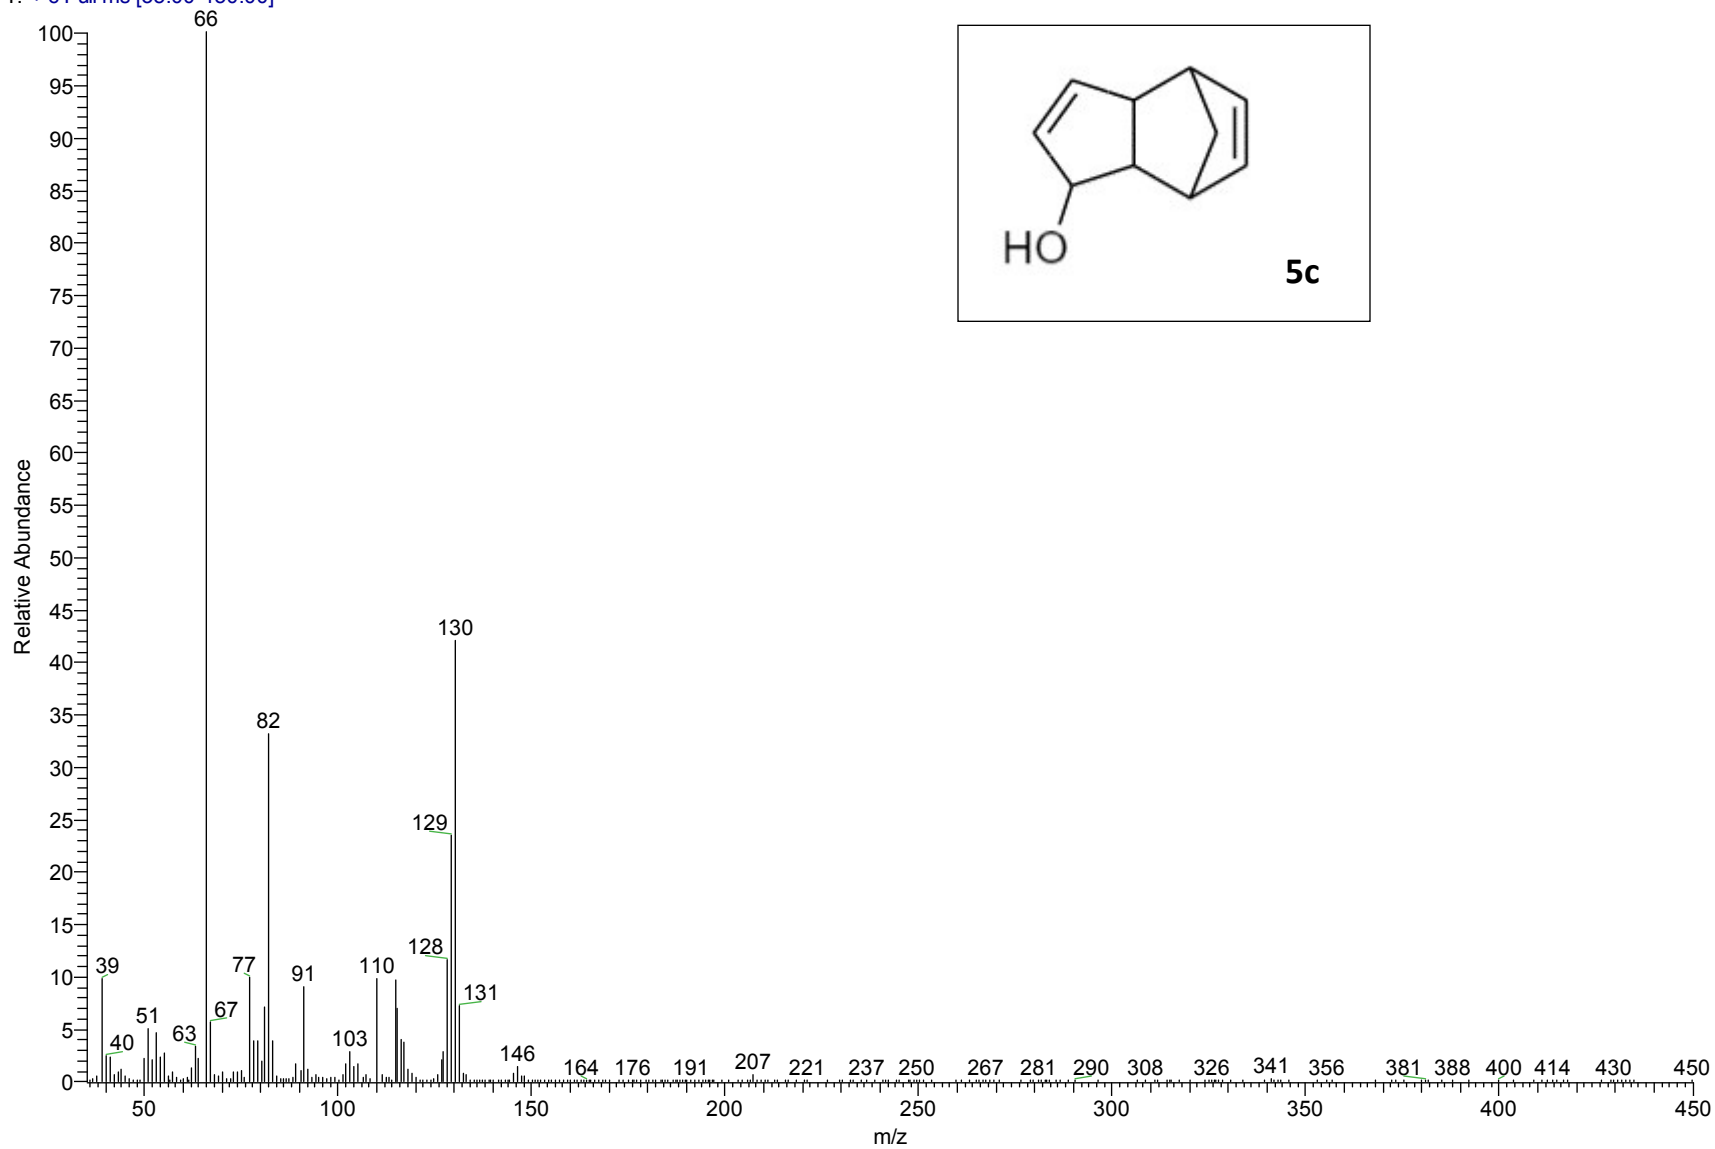

quadrelli39 #1081 RT: 15.42 AV: 1 NL: 1.17E7  
T: + c Full ms [35.00-450.00]

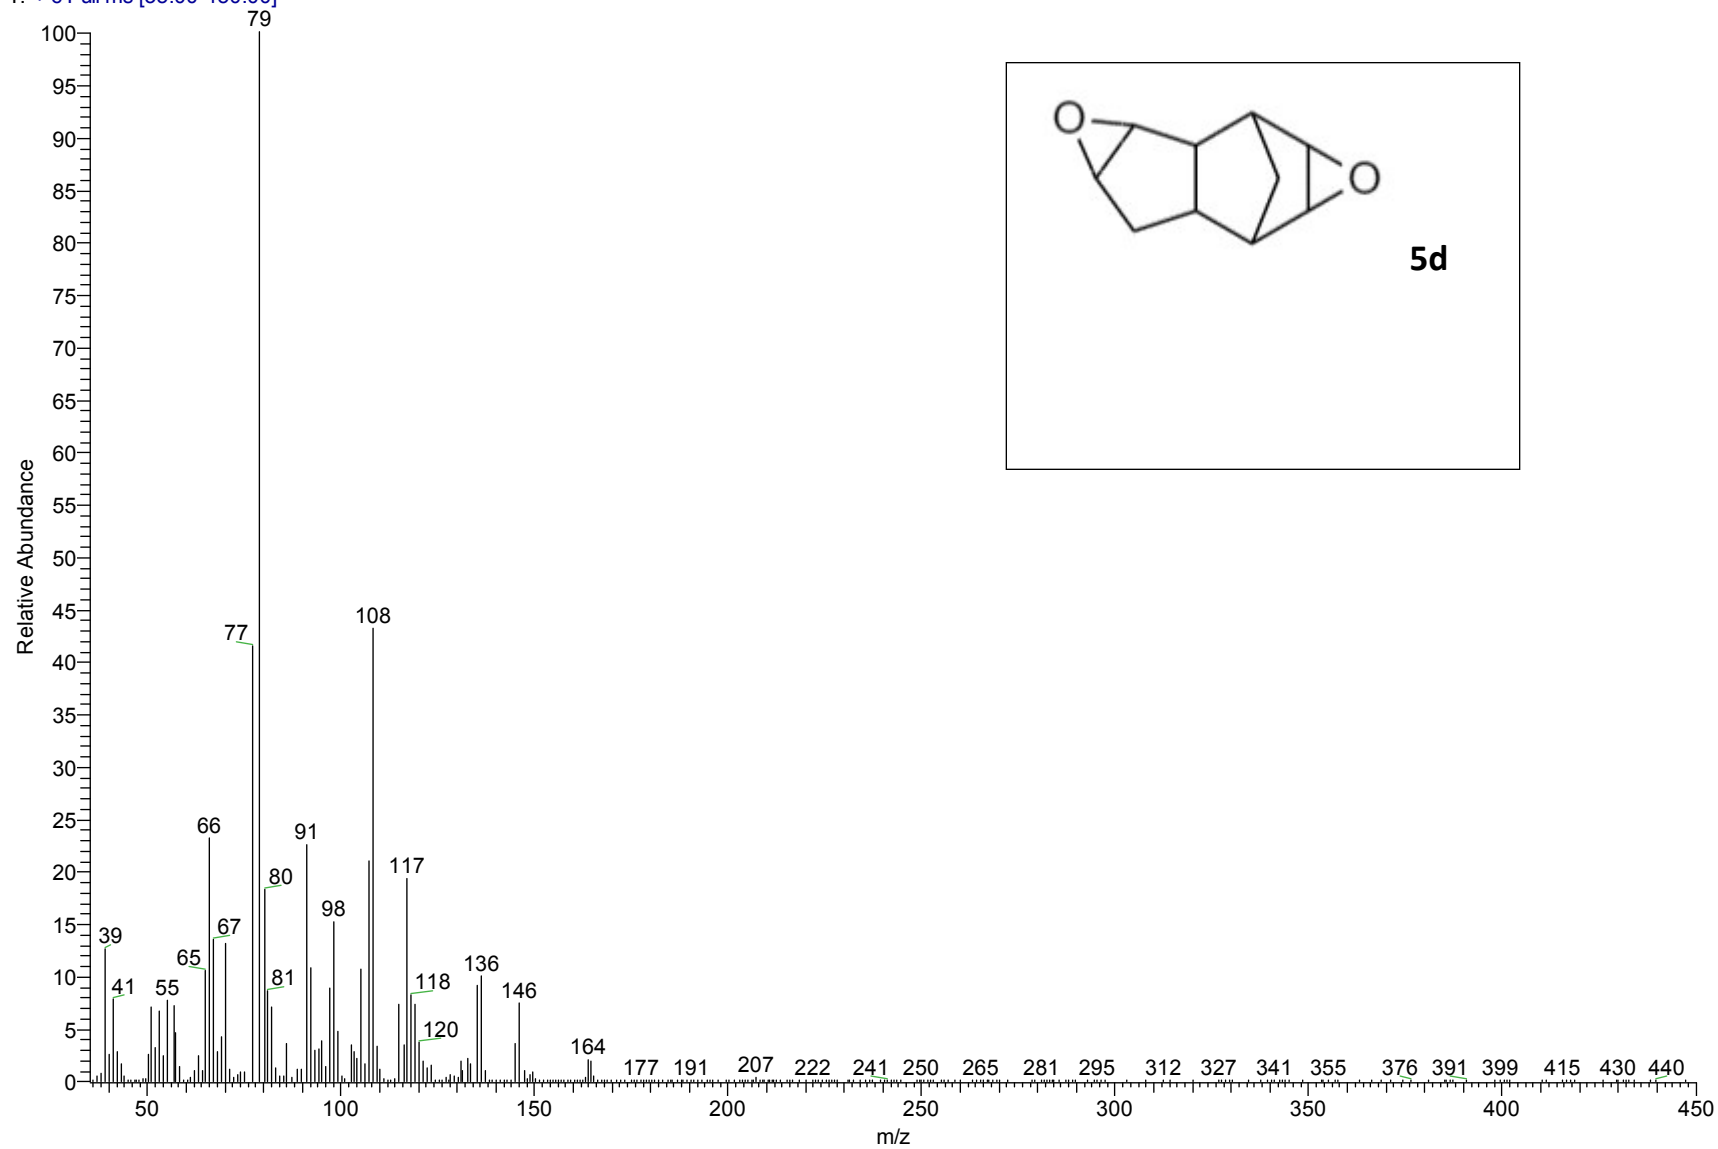

quadrelli39 #1114 RT: 15.80 AV: 1 NL: 5.71E6  
T: + c Full ms [35.00-450.00]

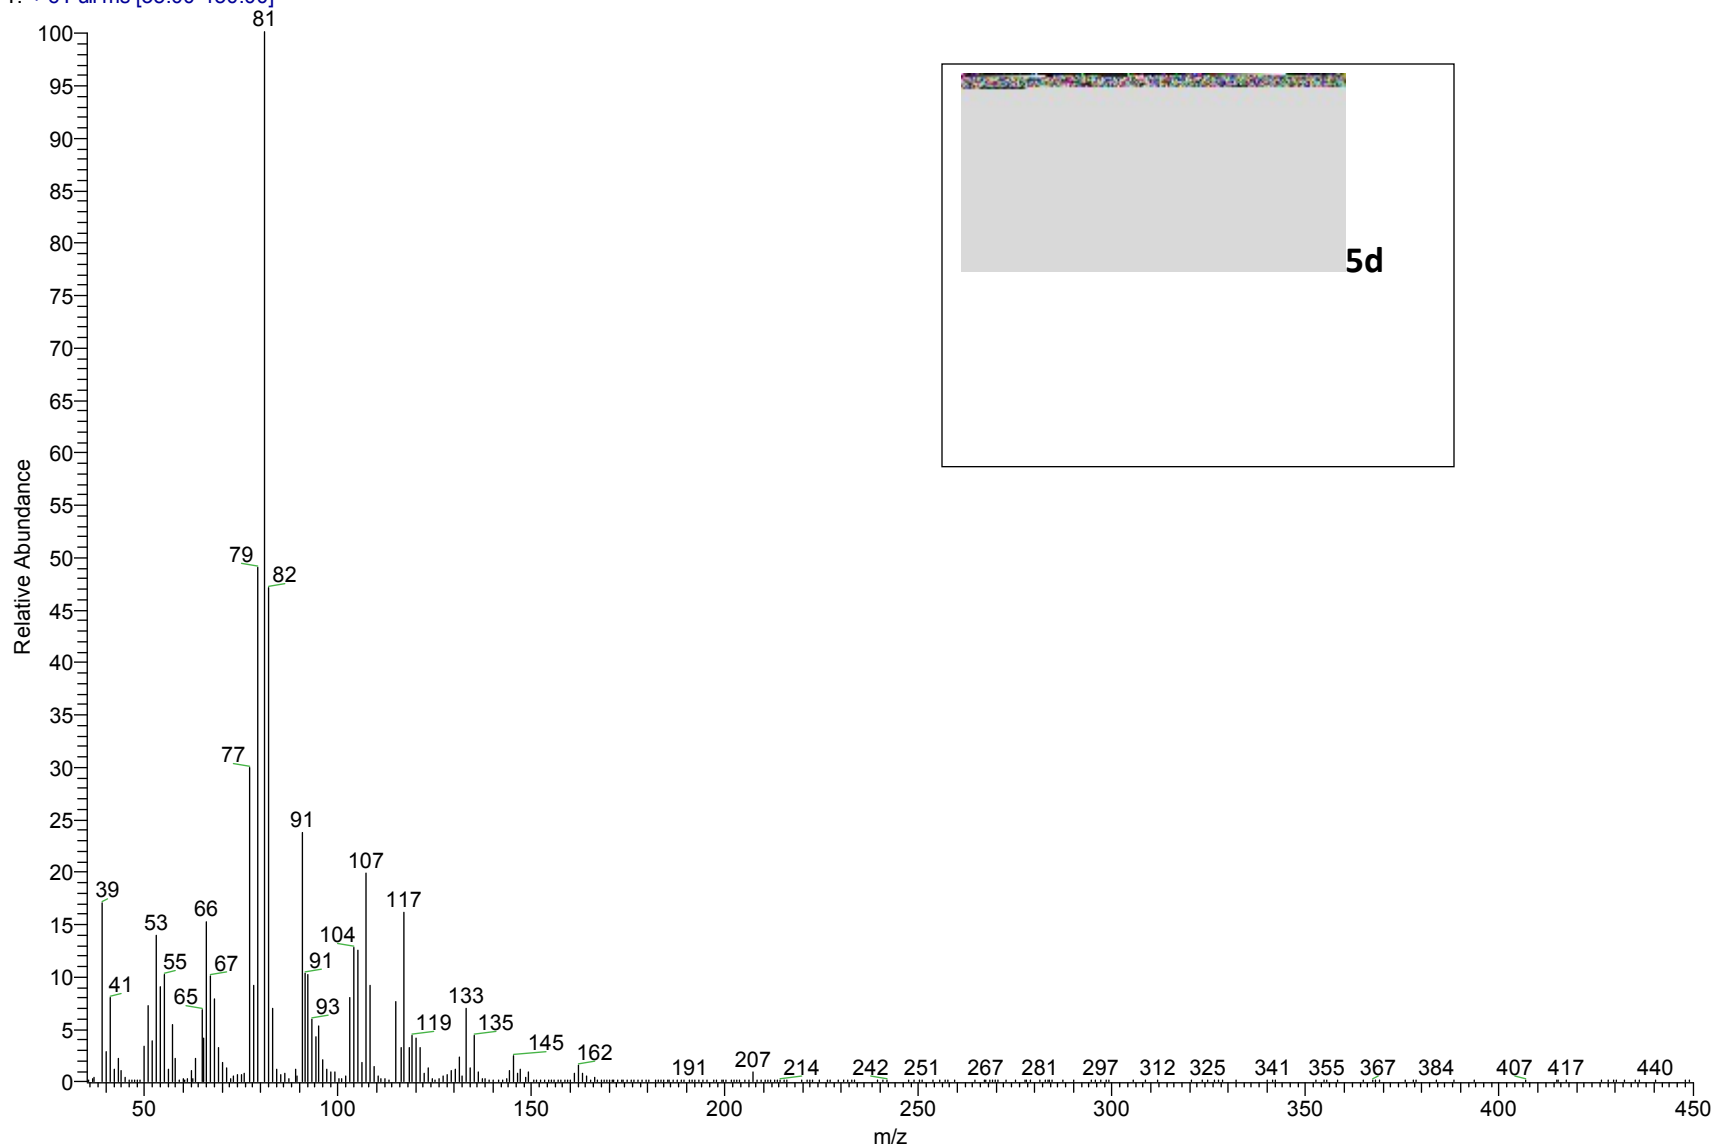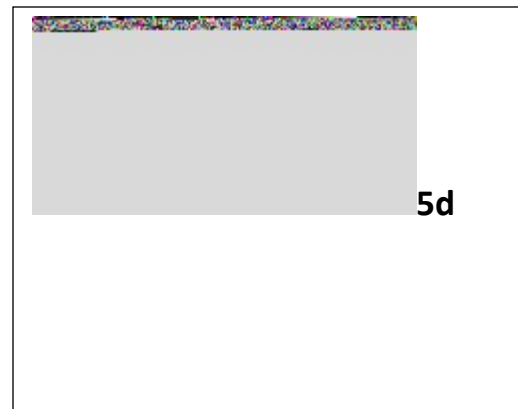

quadrelli39 #1167 RT: 16.41 AV: 1 NL: 4.58E6  
T: + c Full ms [35.00-450.00]

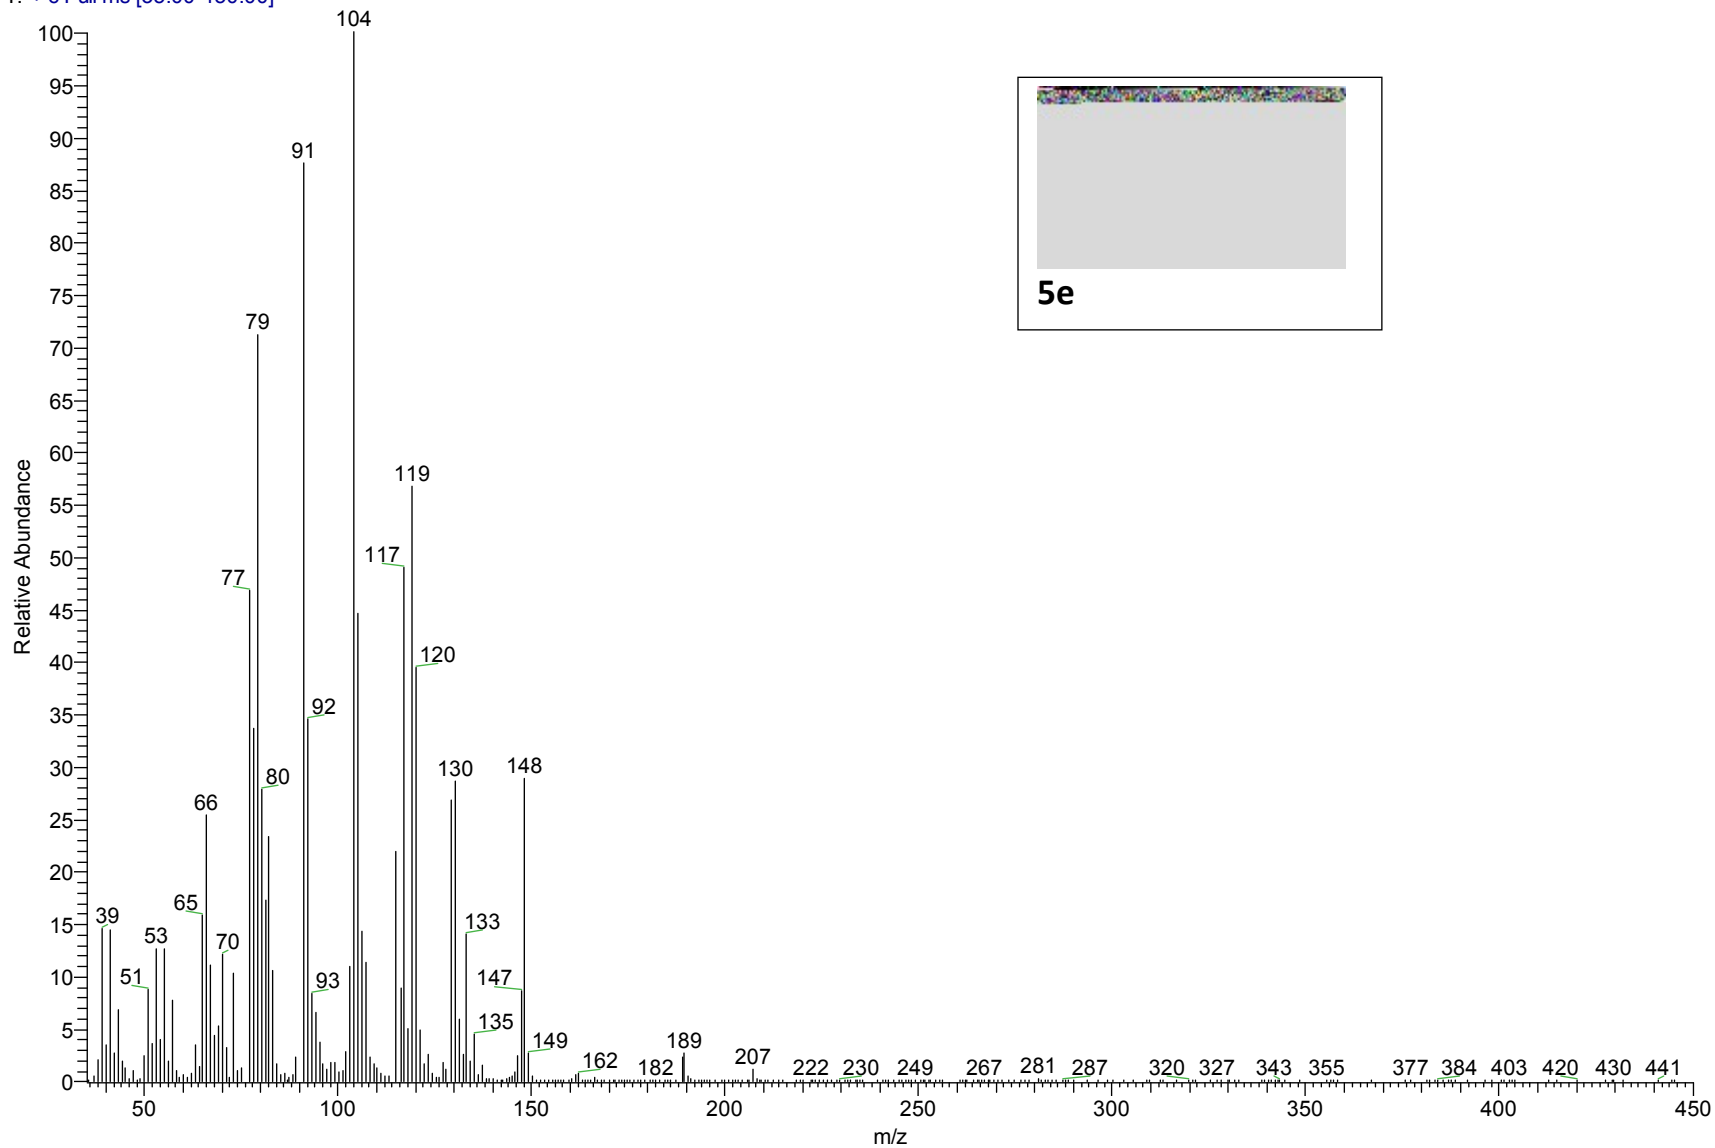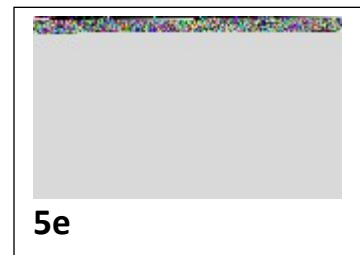

### C4, reactions with cyclopentadiene

RT: 11.48 - 16.83

NL:  
2.40E8  
TIC MS  
quadrelli41

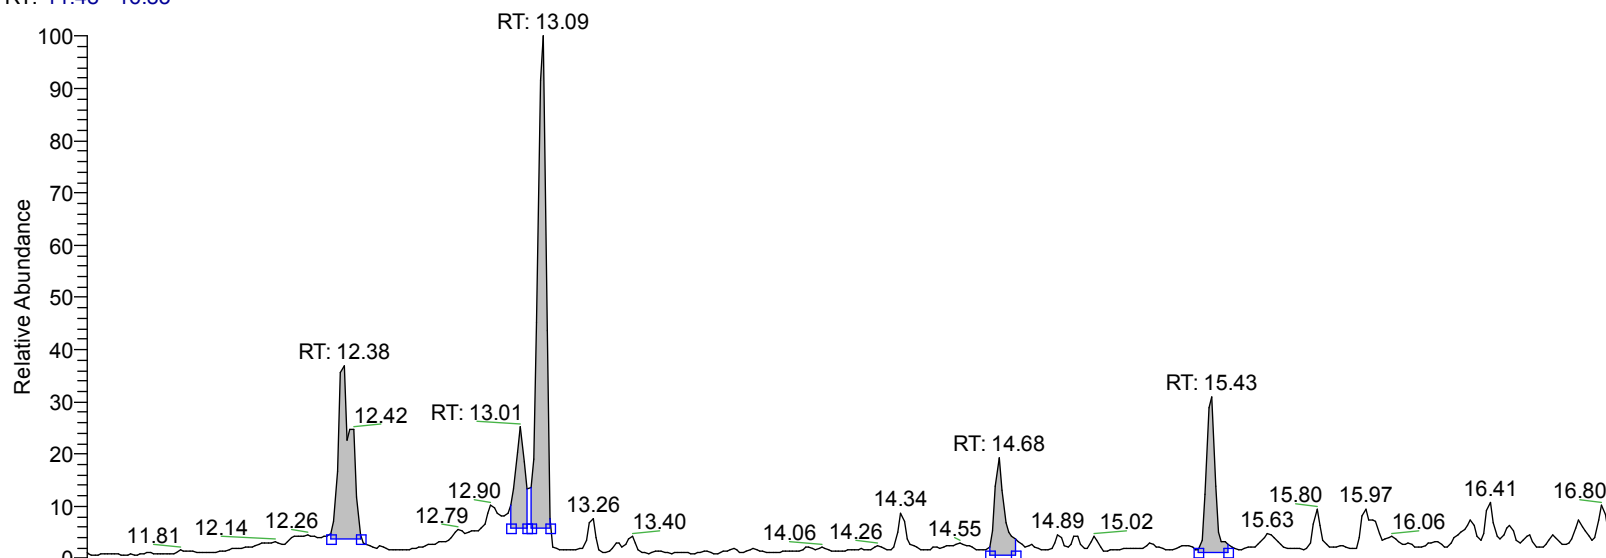

NL:  
3.17E7  
TIC MS  
quadrelli62

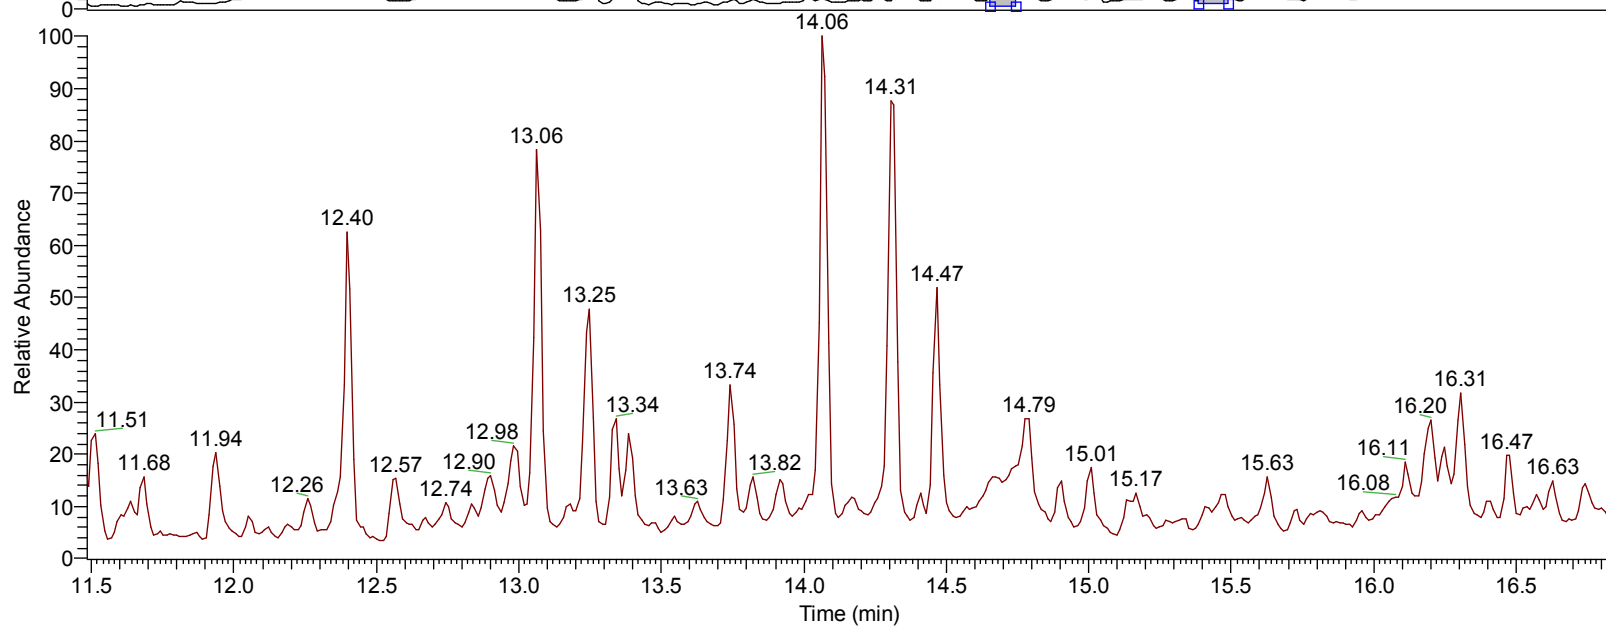

quadrelli41 #871 RT: 13.01 AV: 1 NL: 7.59E6  
T: + c Full ms [35.00-450.00]

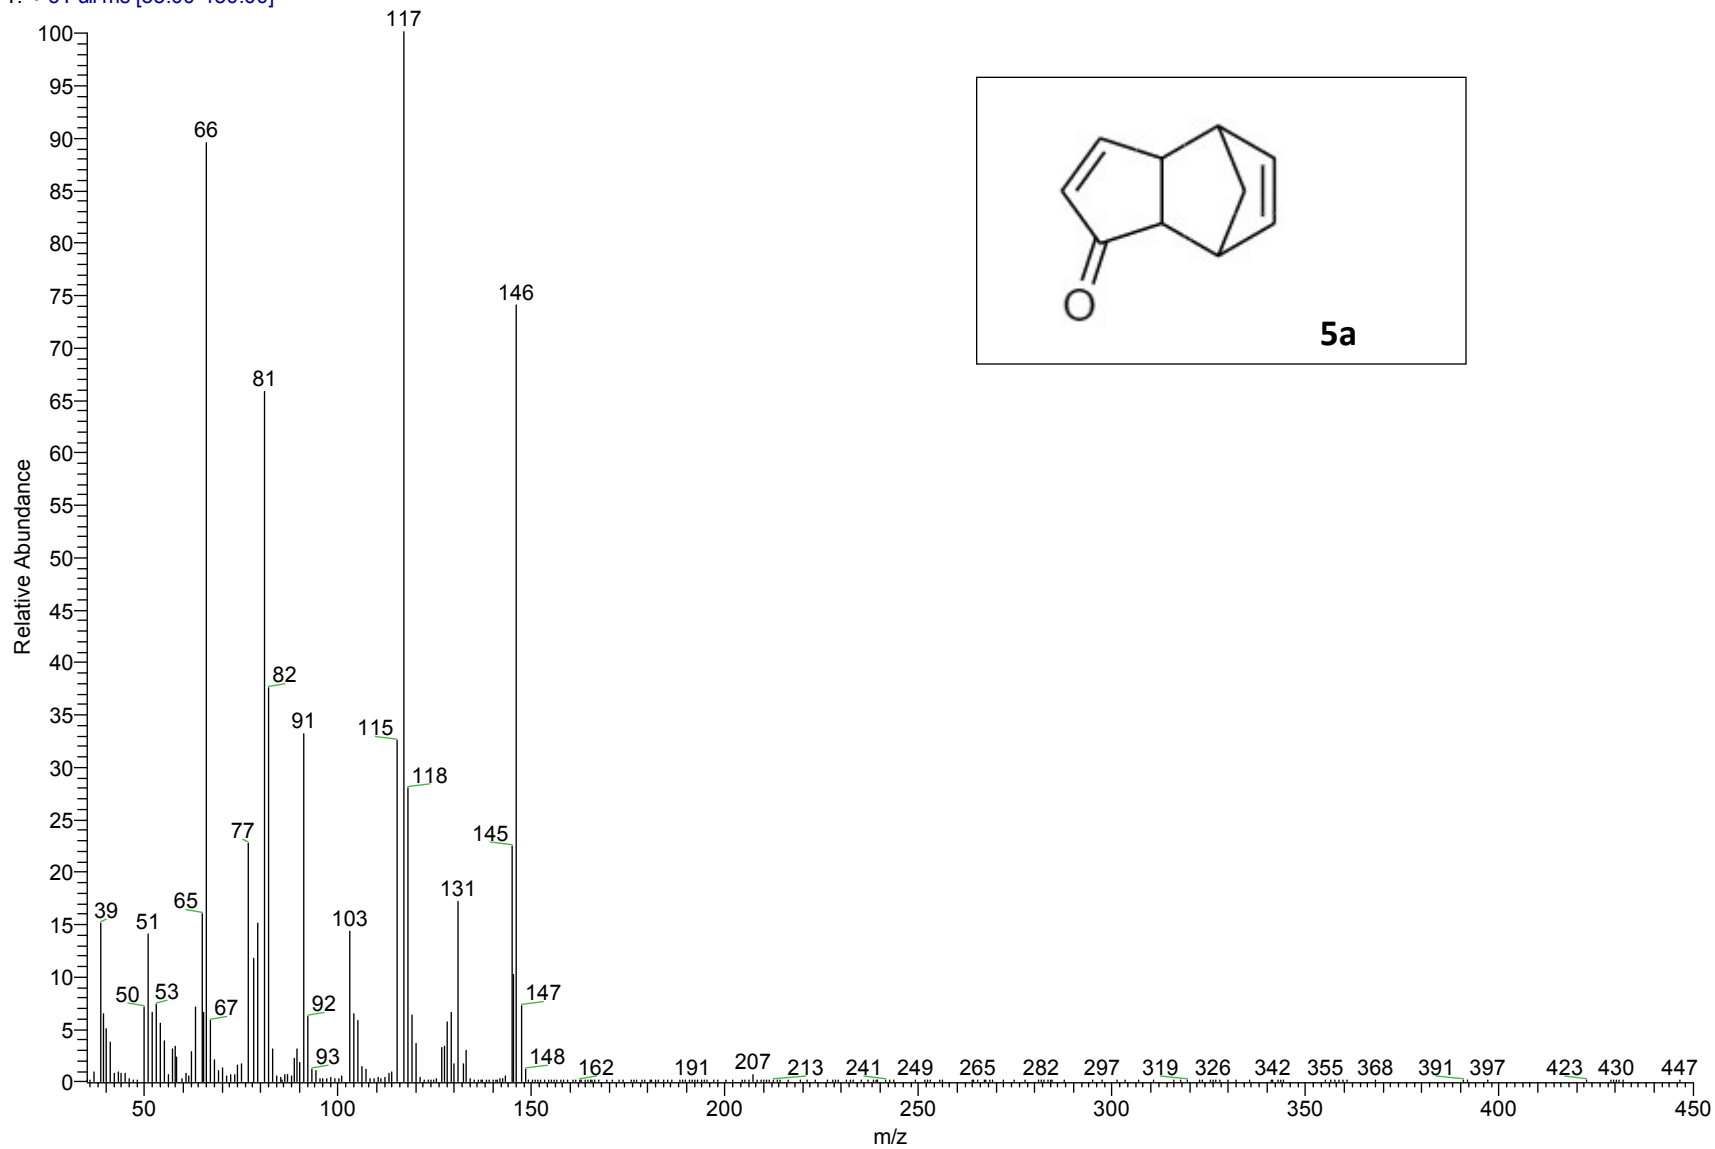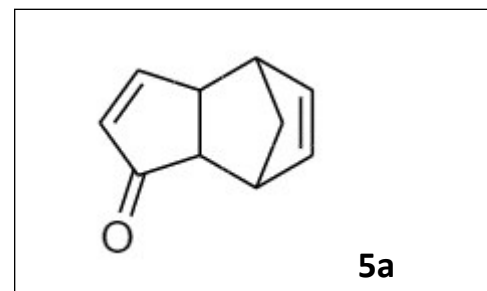

quadrelli41 #878 RT: 13.09 AV: 1 NL: 6.11E7  
T: + c Full ms [35.00-450.00]

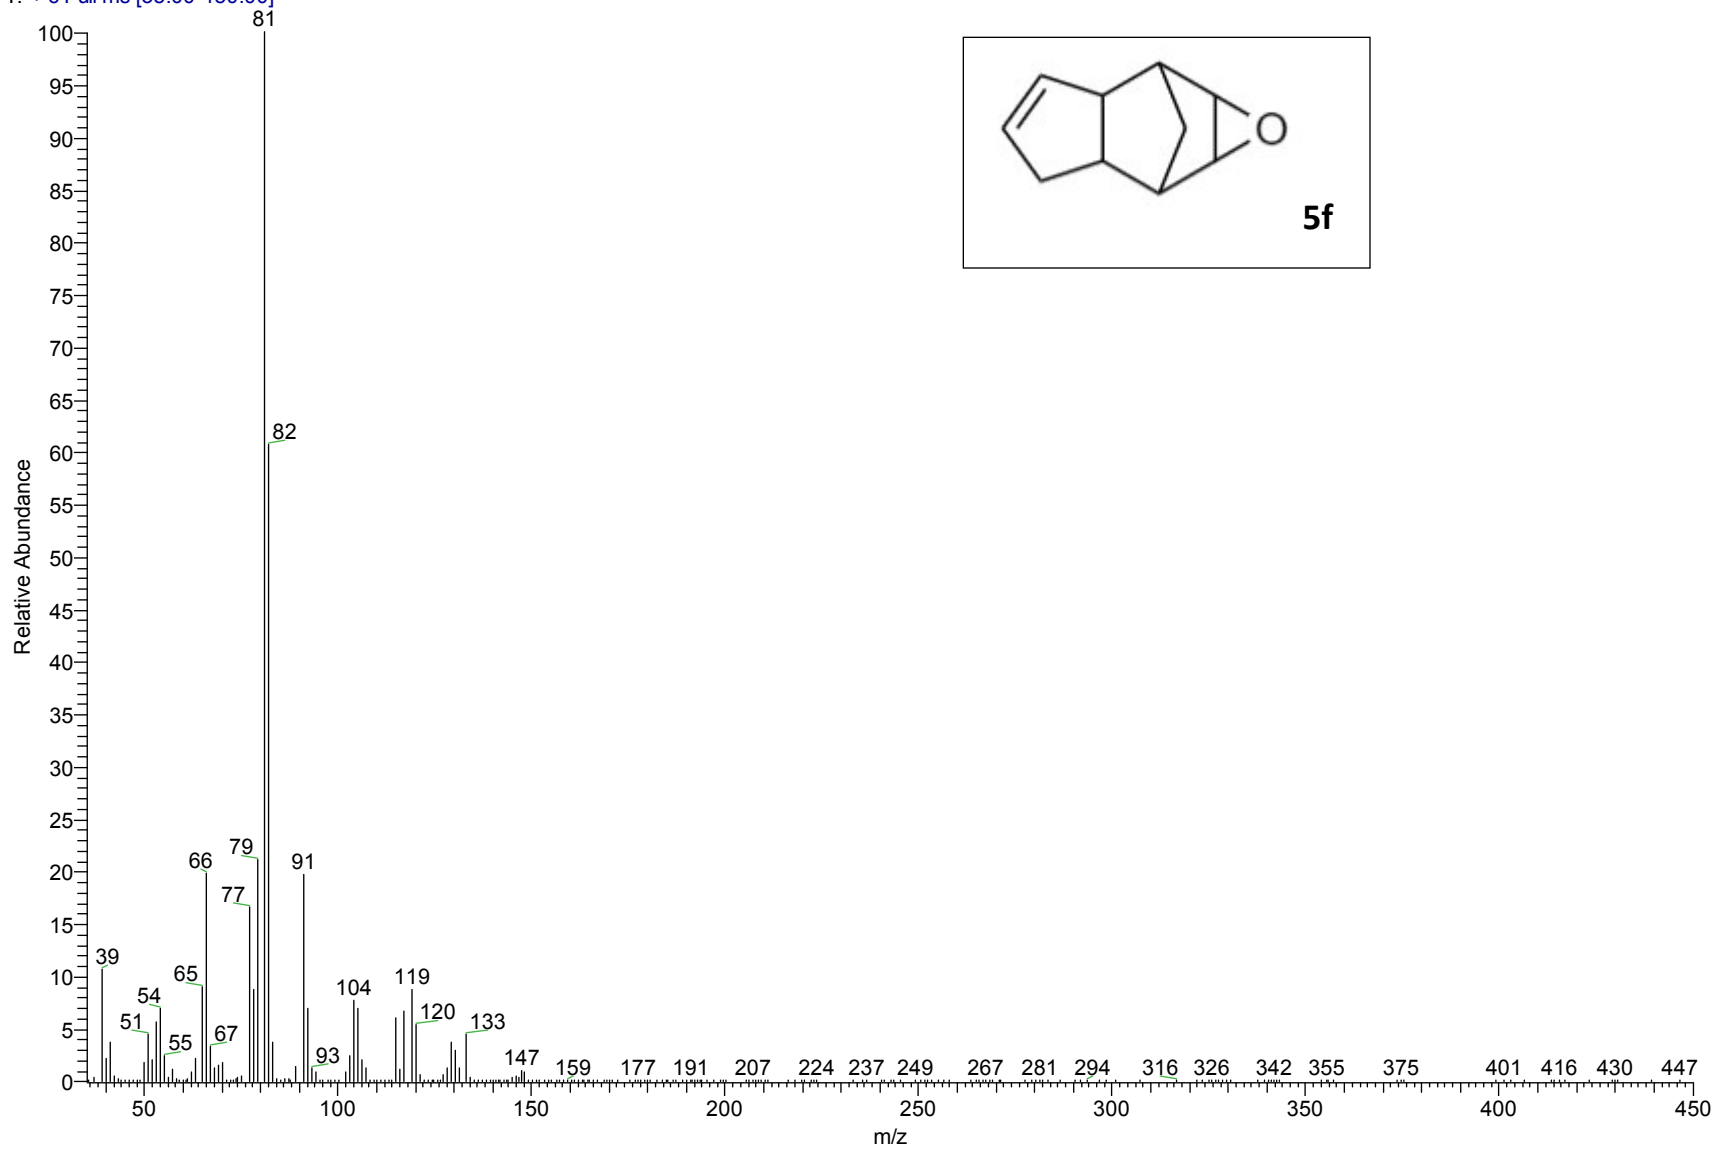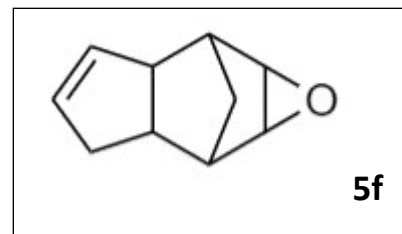



quadrelli41 #1017 RT: 14.68 AV: 1 NL: 9.50E6  
T: + c Full ms [35.00-450.00]

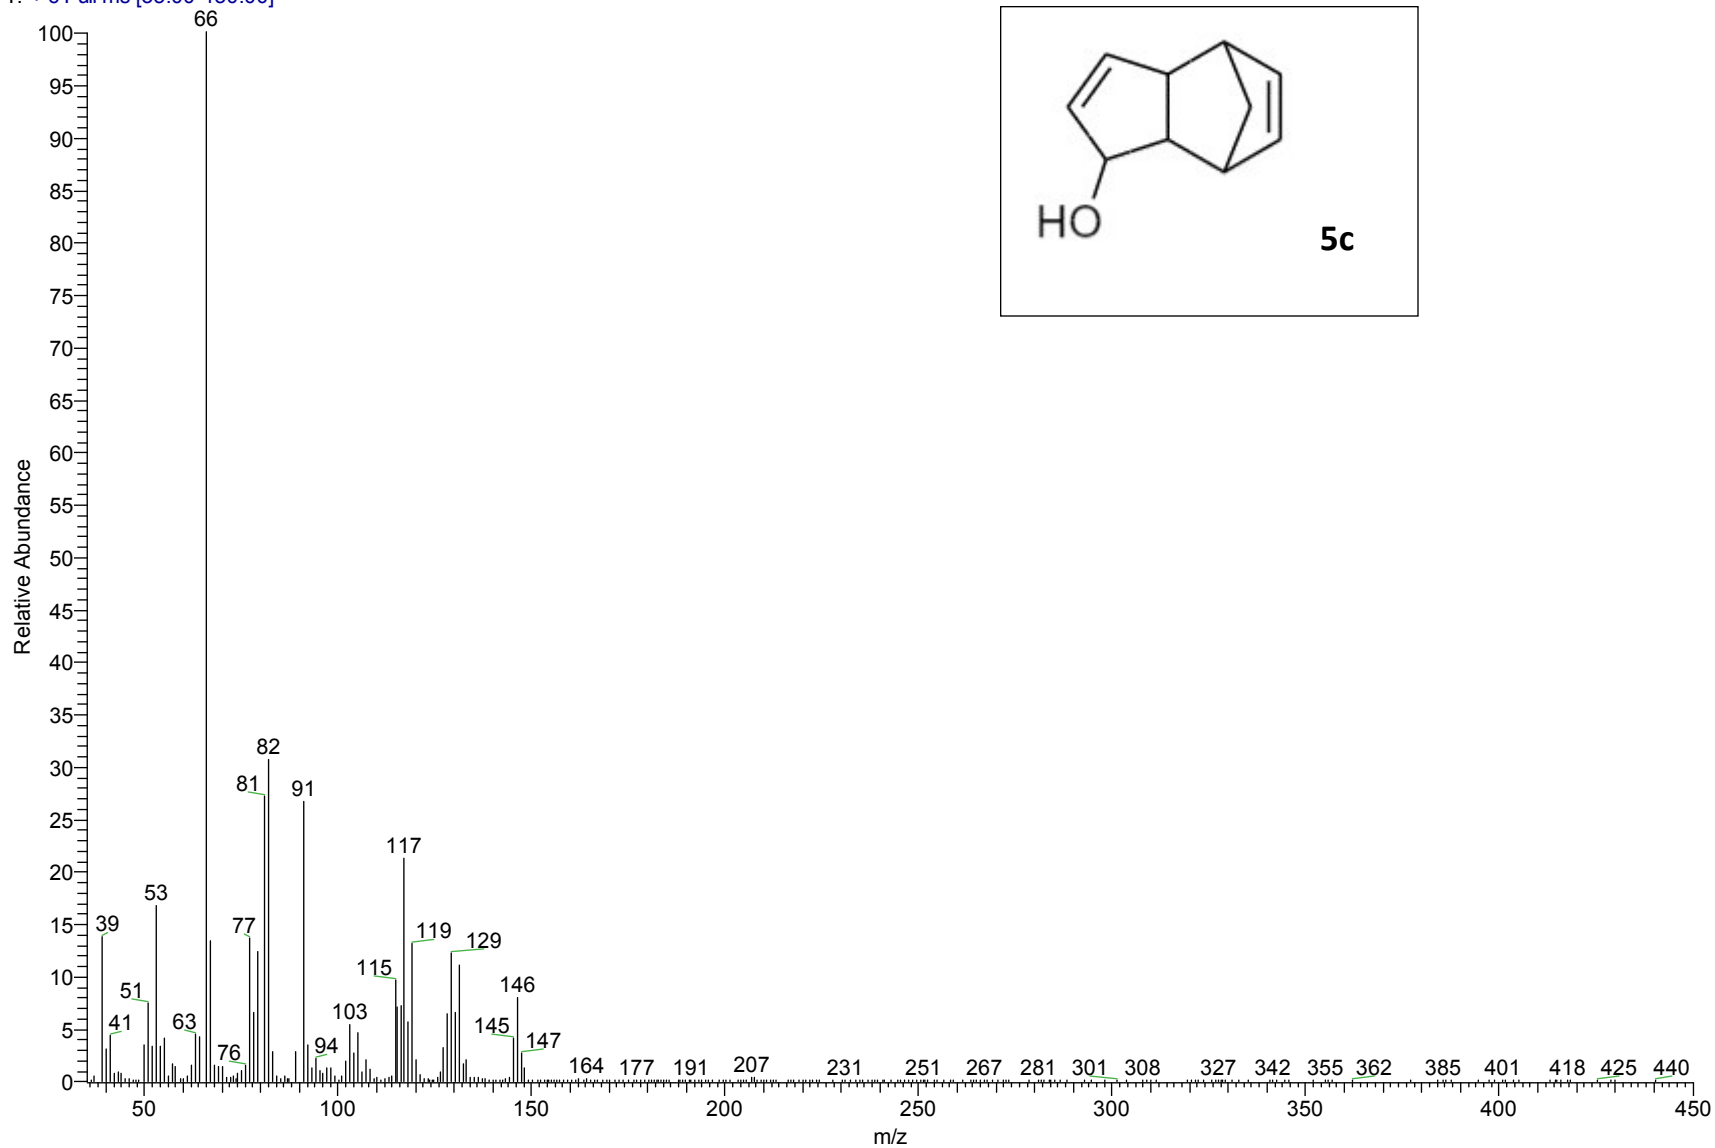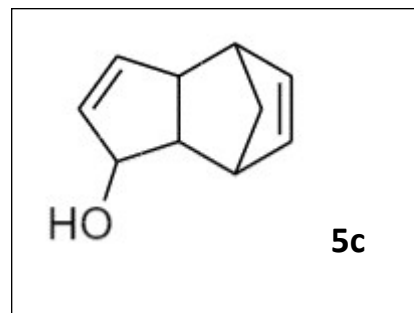

quadrelli41 #1082 RT: 15.43 AV: 1 NL: 1.05E7  
T: + c Full ms [35.00-450.00]

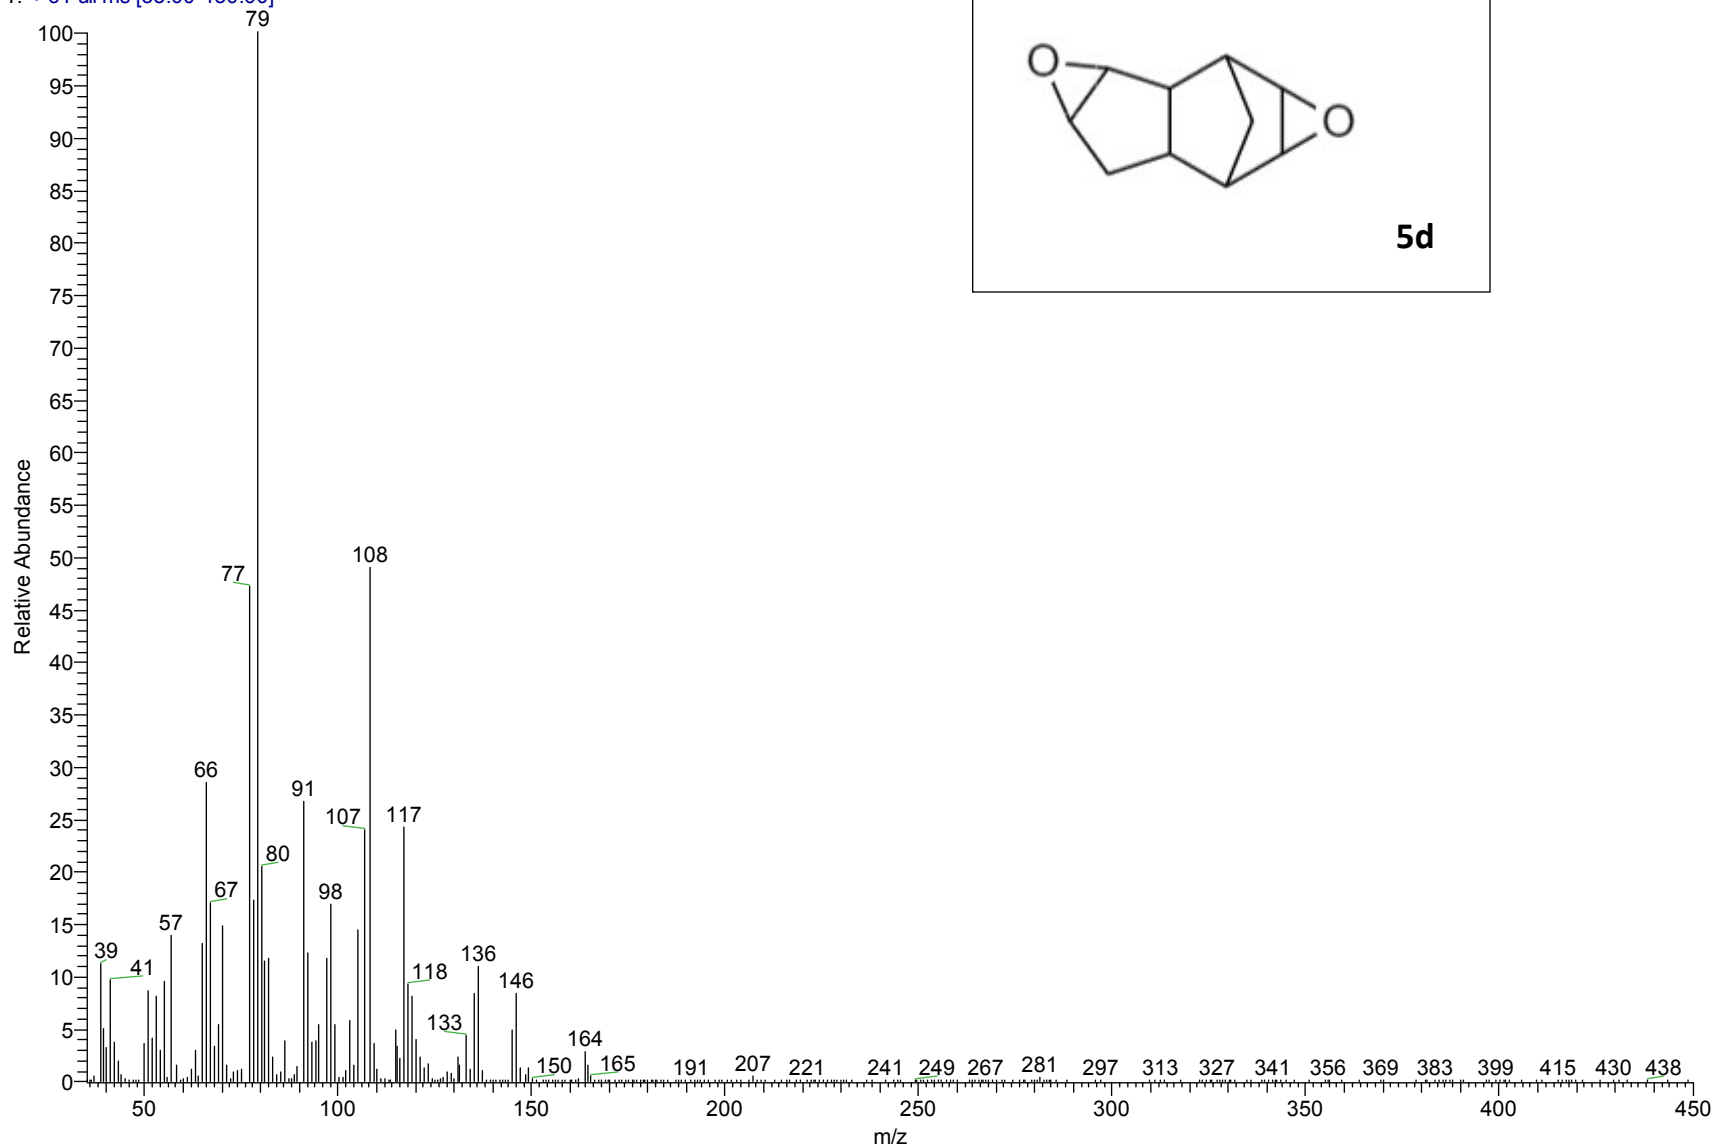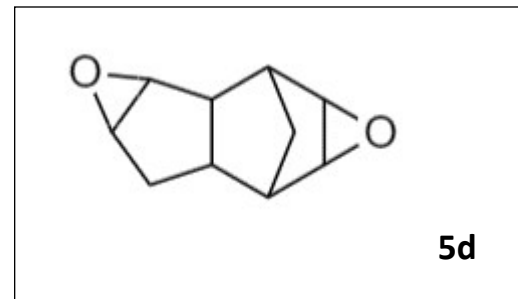

**C4**, reaction with 1-octene

RT: 0.00 - 30.04

NL:  
5.46E8  
TIC MS  
quadrelli17  
5

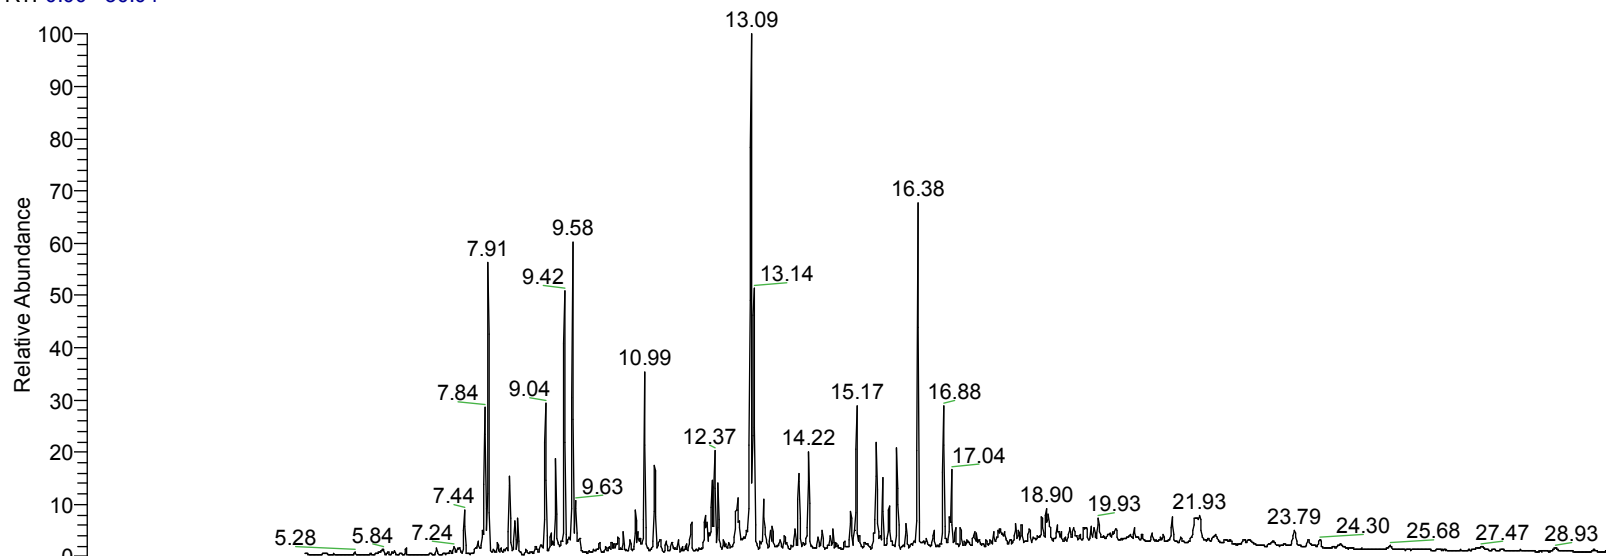

NL:  
6.13E8  
TIC MS  
quadrelli17  
6

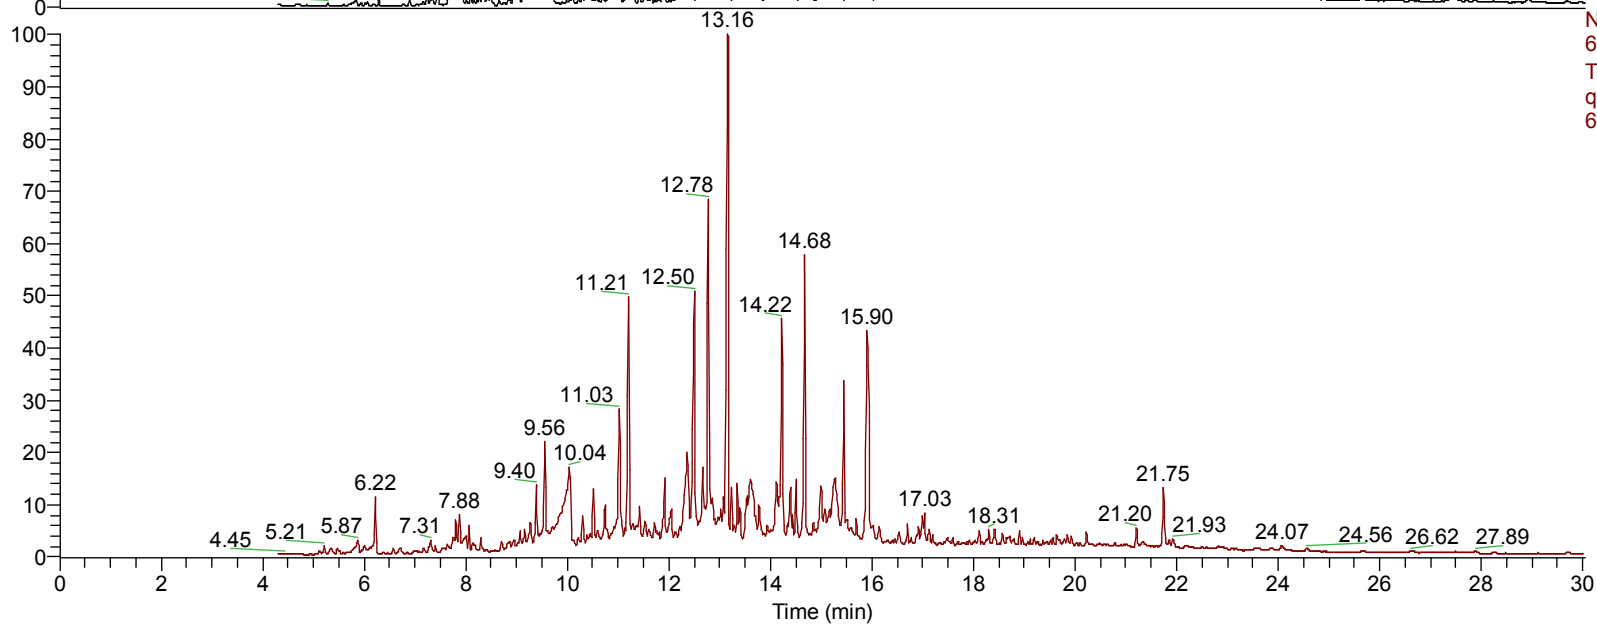

quadrelli174 #602 RT: 11.21 AV: 1 NL: 8.45E7  
T: + c Full ms [35.00-450.00]

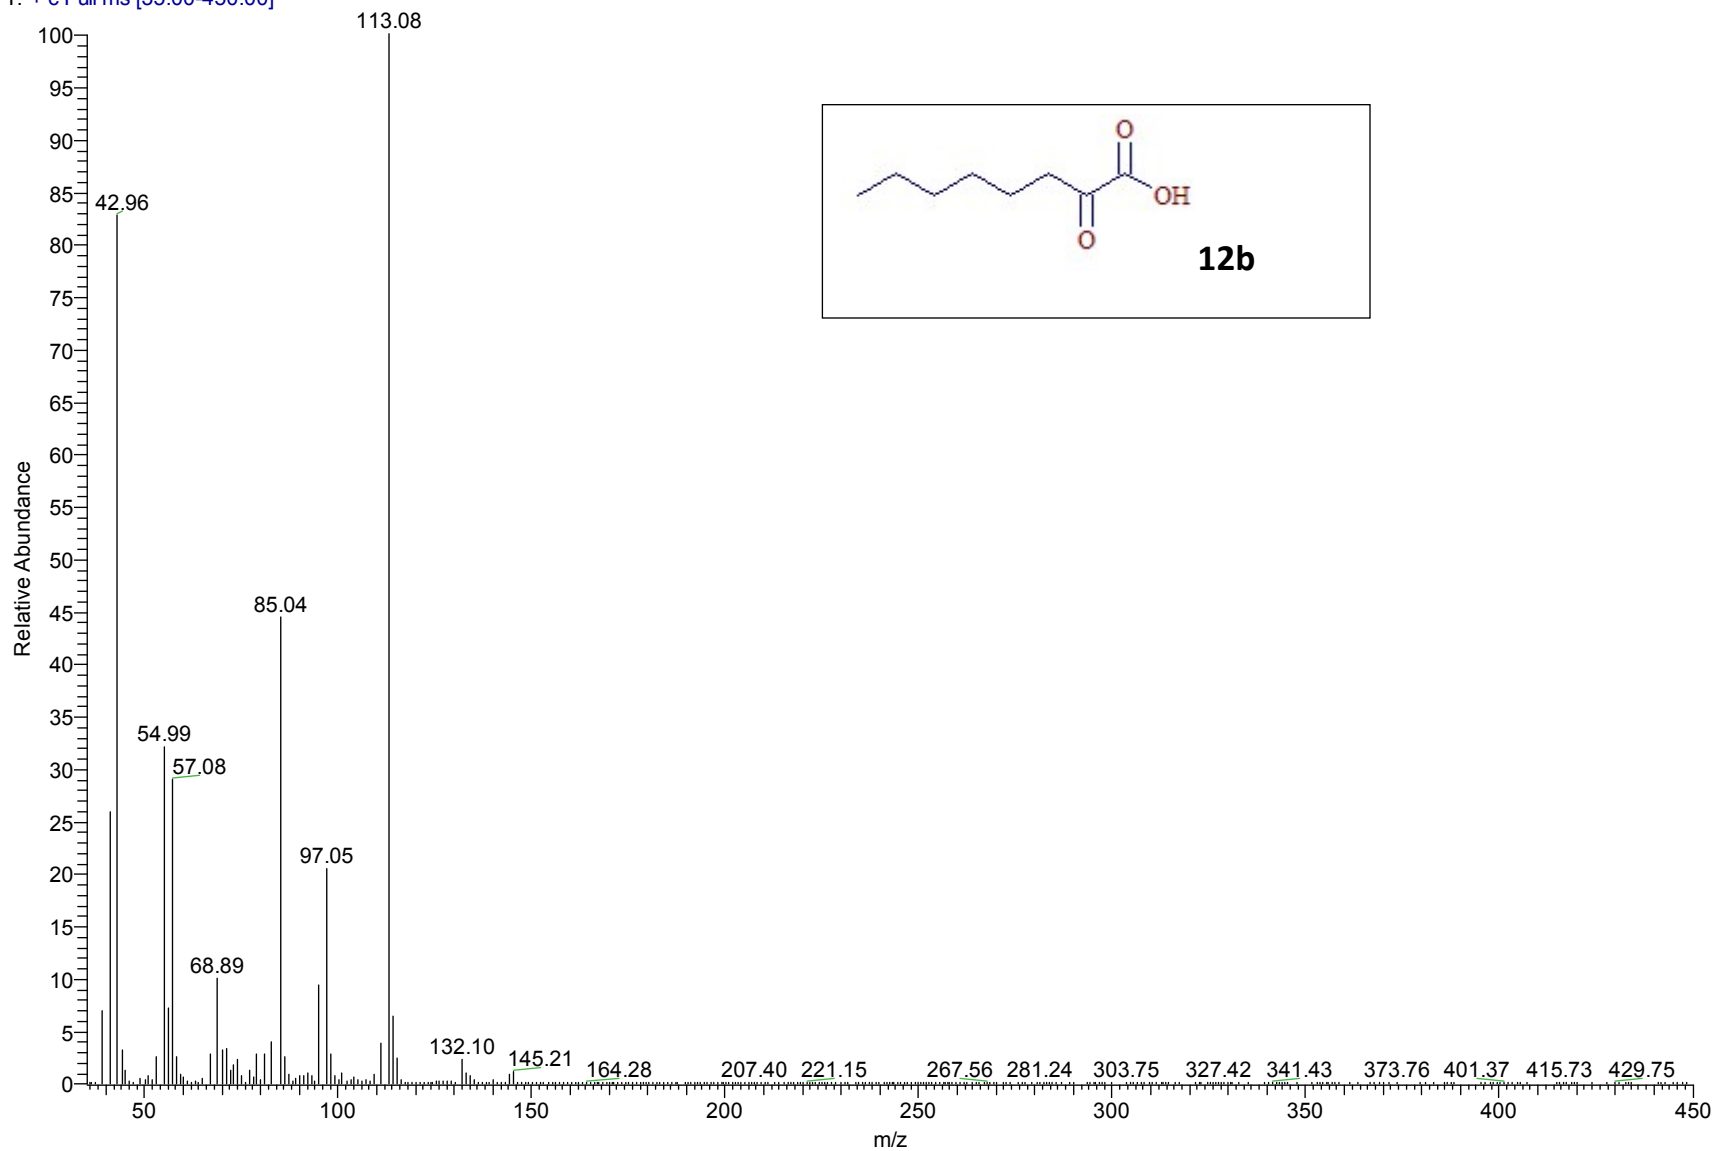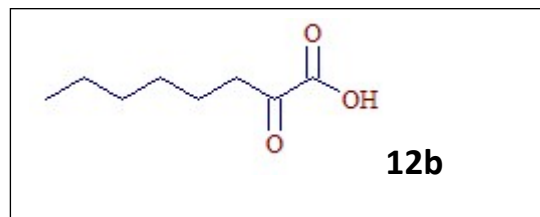

quadrelli174 #714 RT: 12.50 AV: 1 NL: 7.95E7  
T: + c Full ms [35.00-450.00]

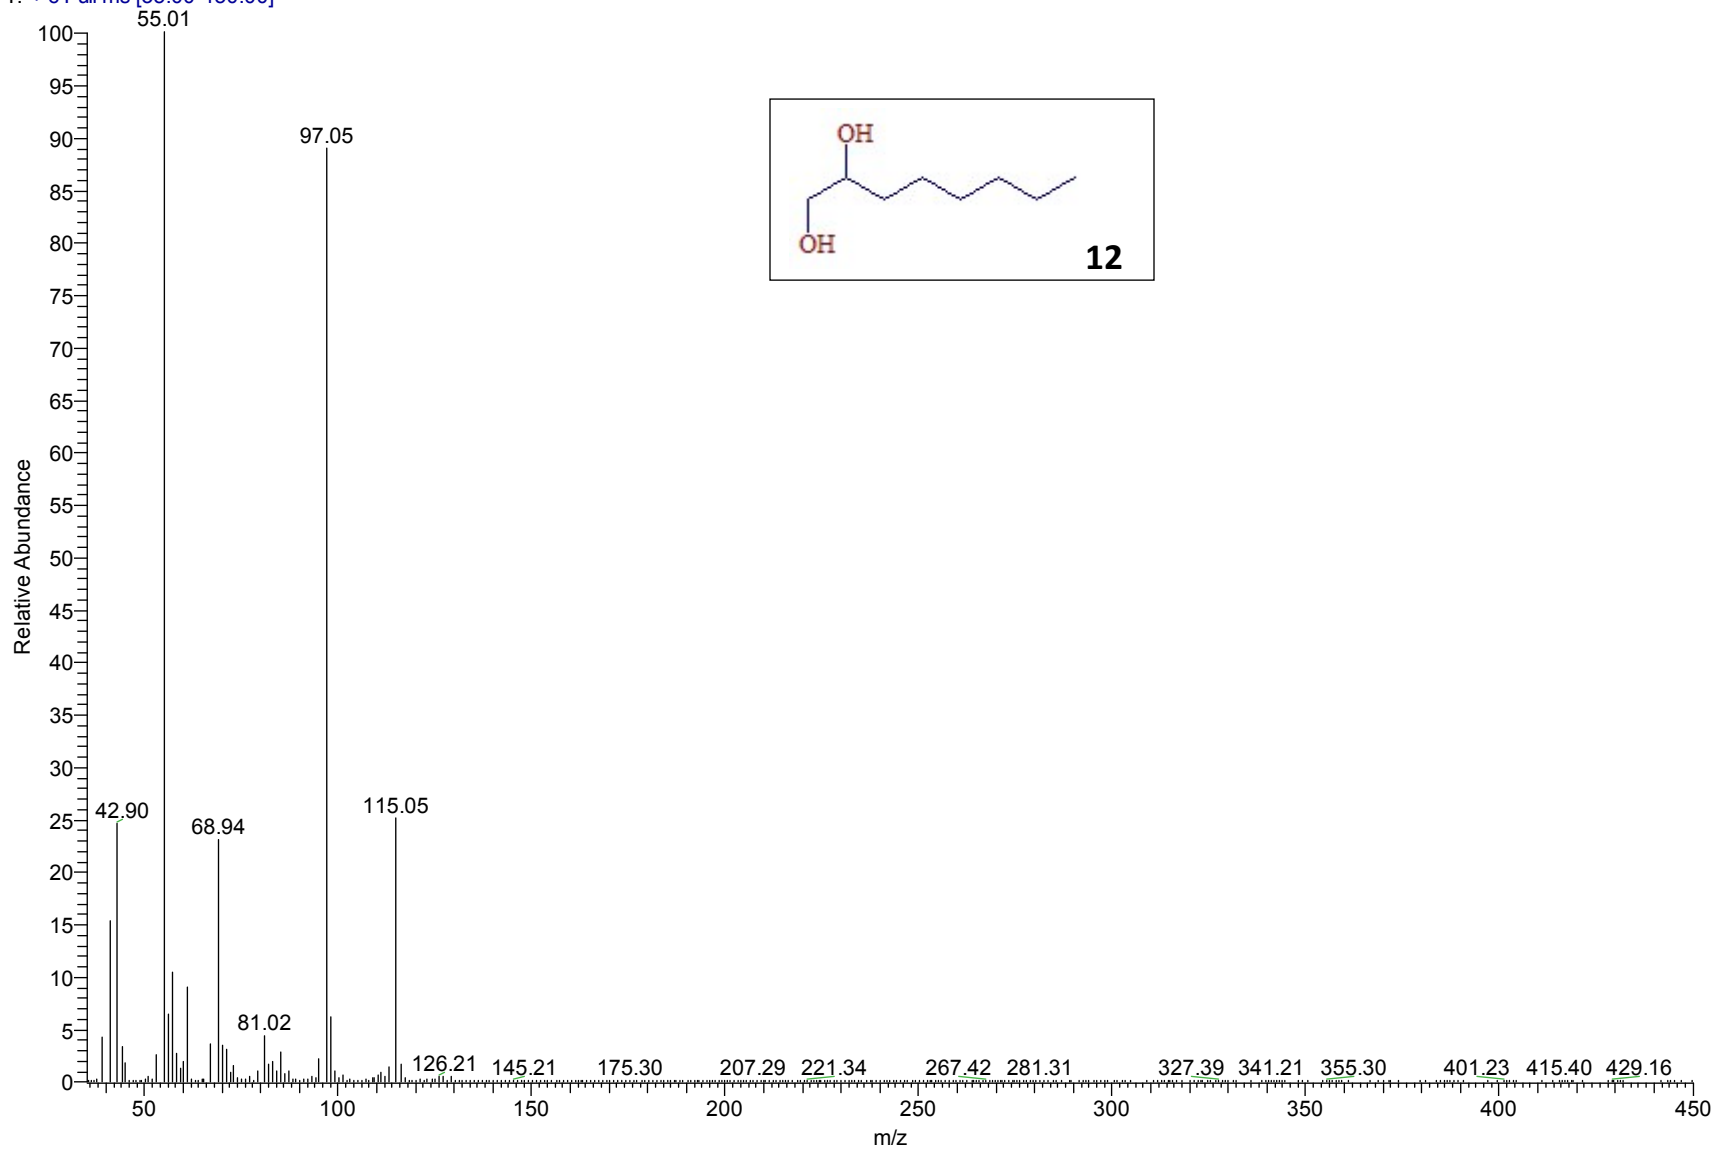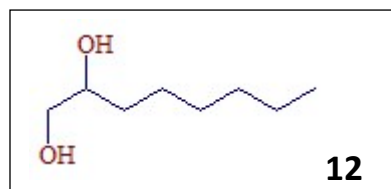

**C4**, reaction with trimethyl ethylene (tme)

RT: 0.00 - 30.04

NL:  
1.24E8  
TIC MS  
quadrelli12  
3

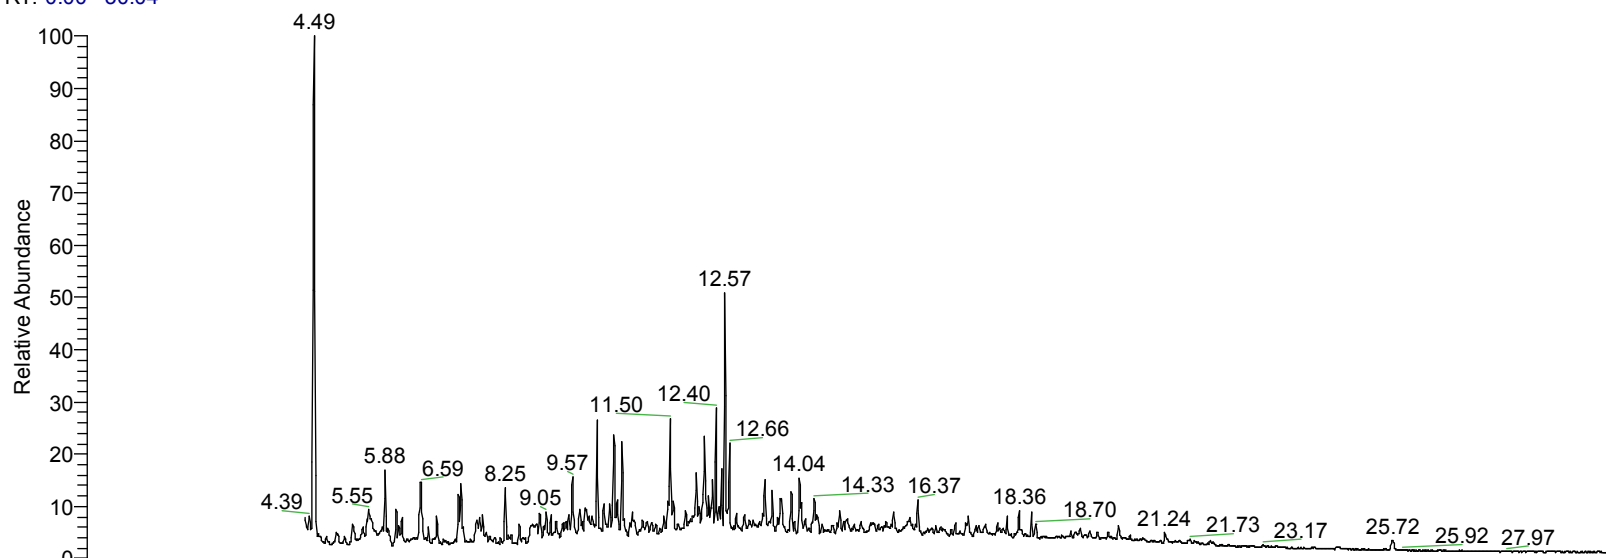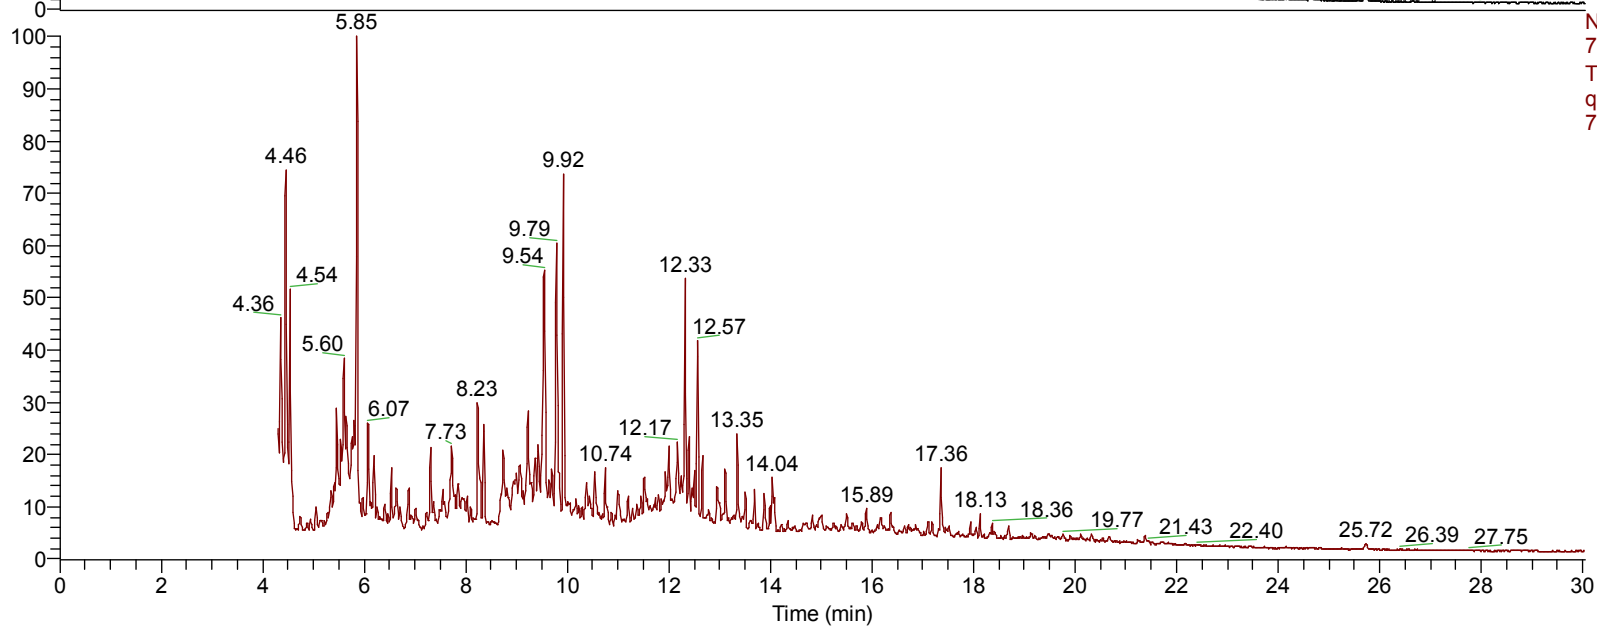

quadrelli127 #136 RT: 5.85 AV: 1 NL: 3.14E7

T: + c Full ms [35.00-450.00]

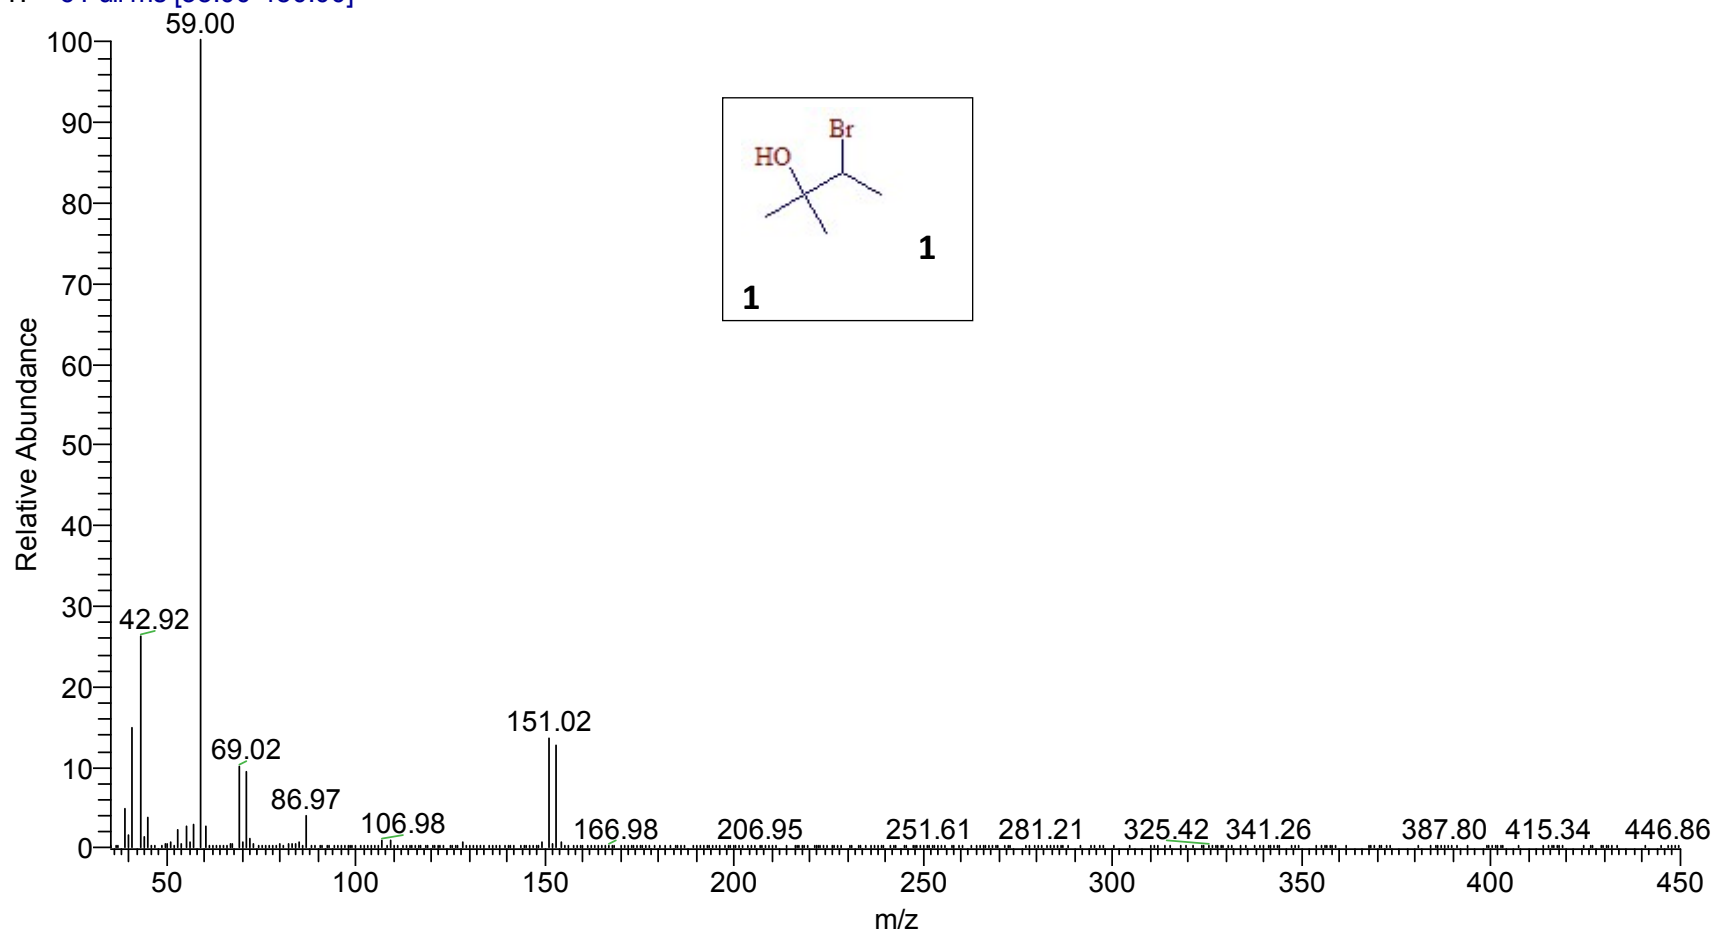

**C4**, reaction with tetramethyl ethylene (TME)

RT: 0.00 - 30.05

NL:  
5.78E6  
TIC MS  
quadrelli86

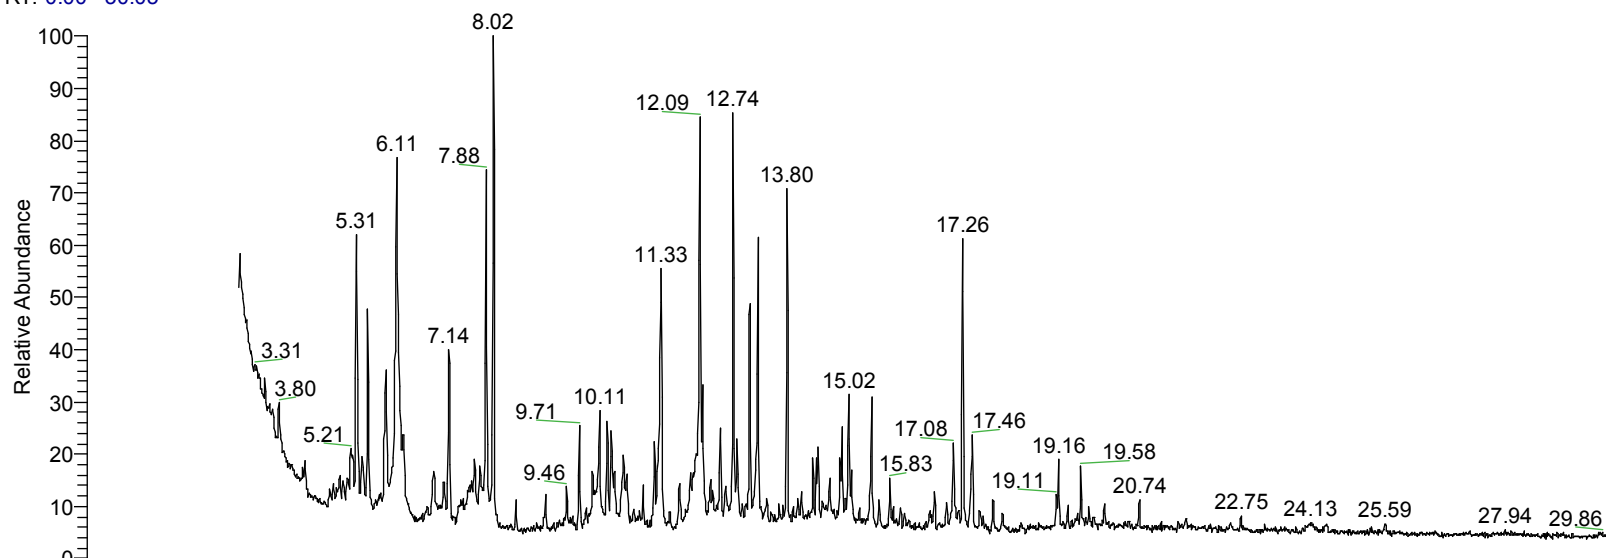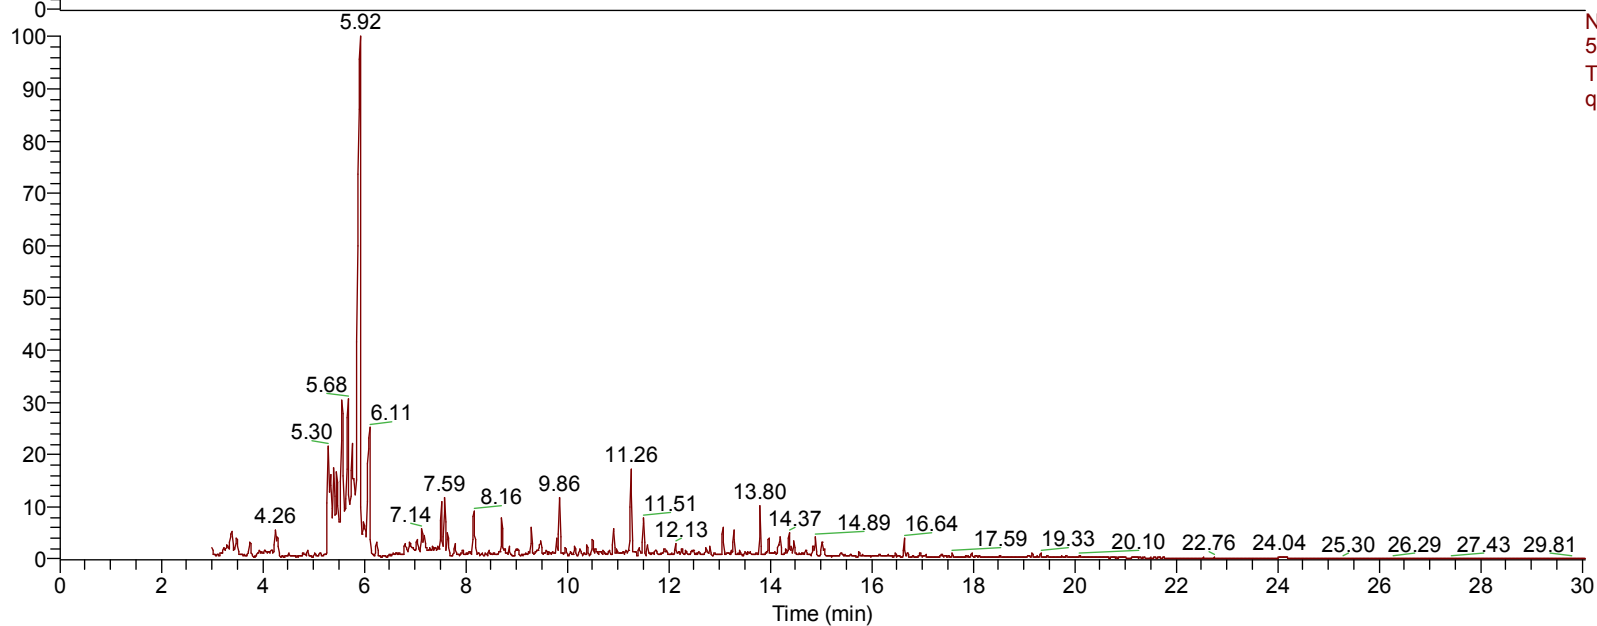



***No results***

**C4**, reaction with cyclopentene

RT: 0.00 - 30.02

NL:  
5.66E8  
TIC MS  
quadrelli11  
4

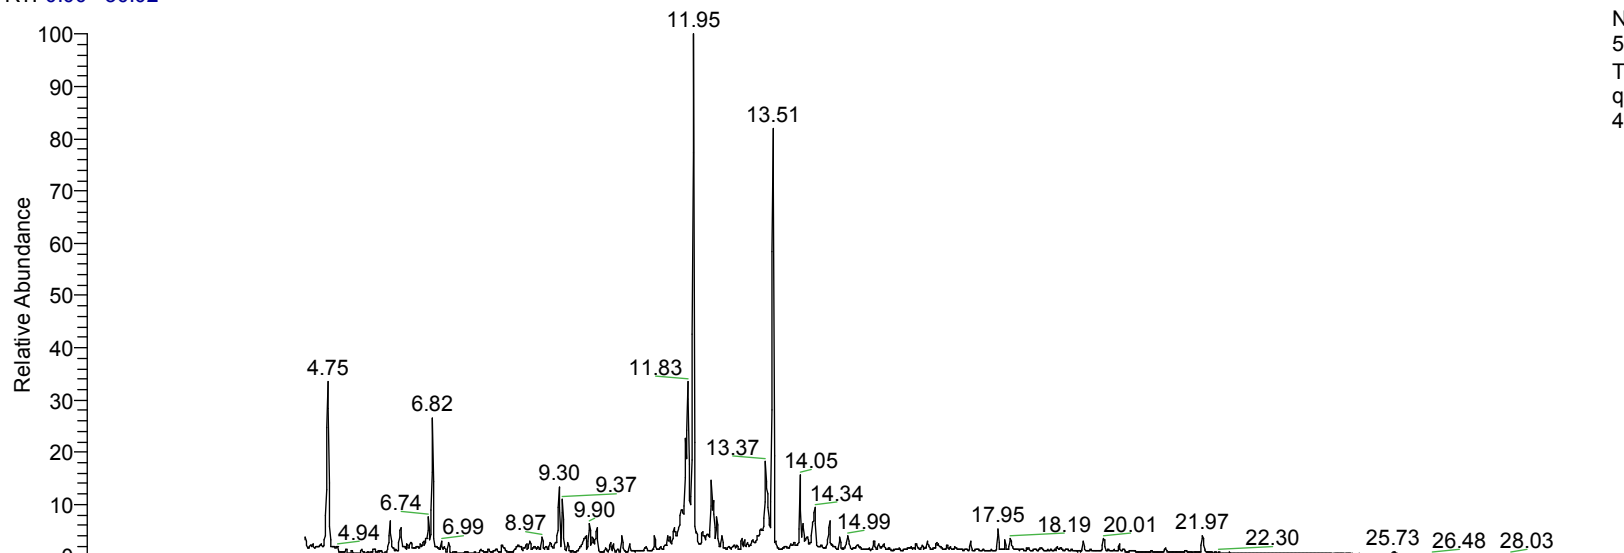

NL:  
2.76E8  
TIC MS  
quadrelli11  
5

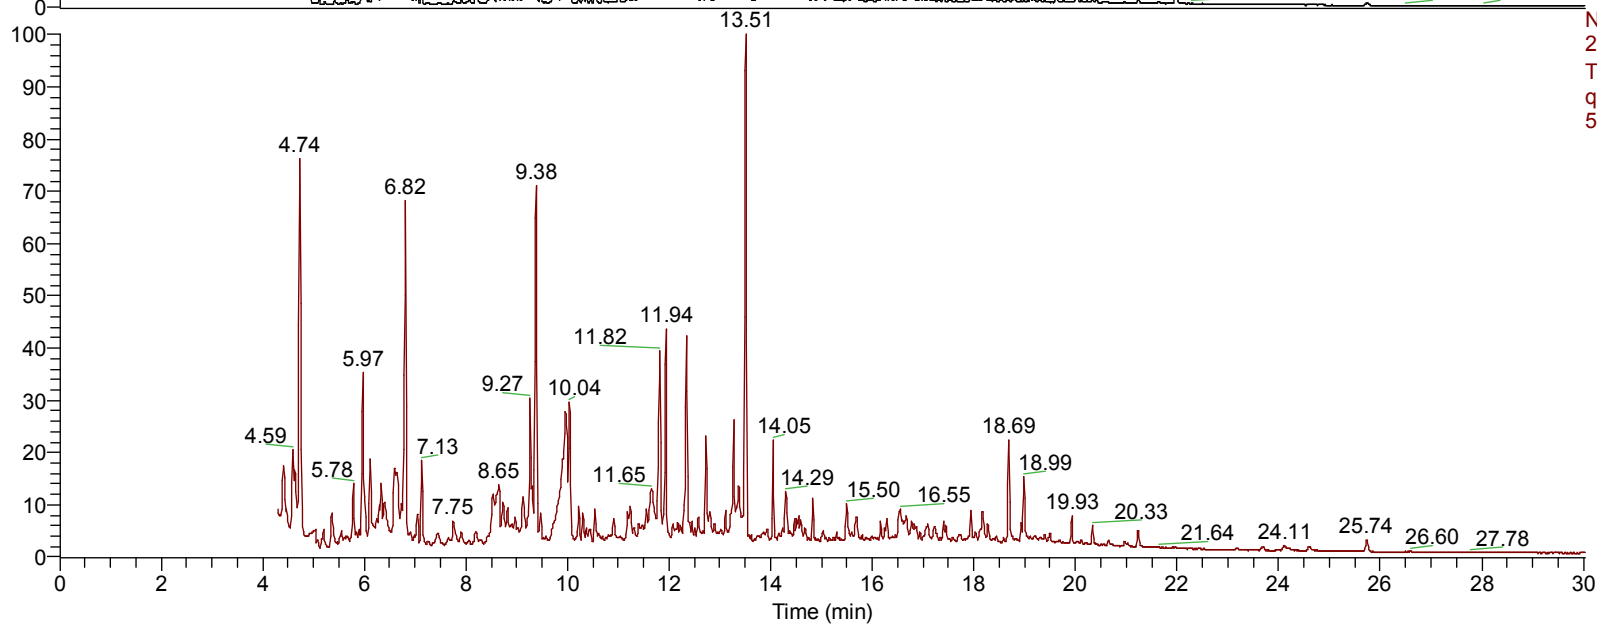

quadrelli139 #44 RT: 4.80 AV: 1 NL: 8.17E7  
T: + c Full ms [35.00-450.00]

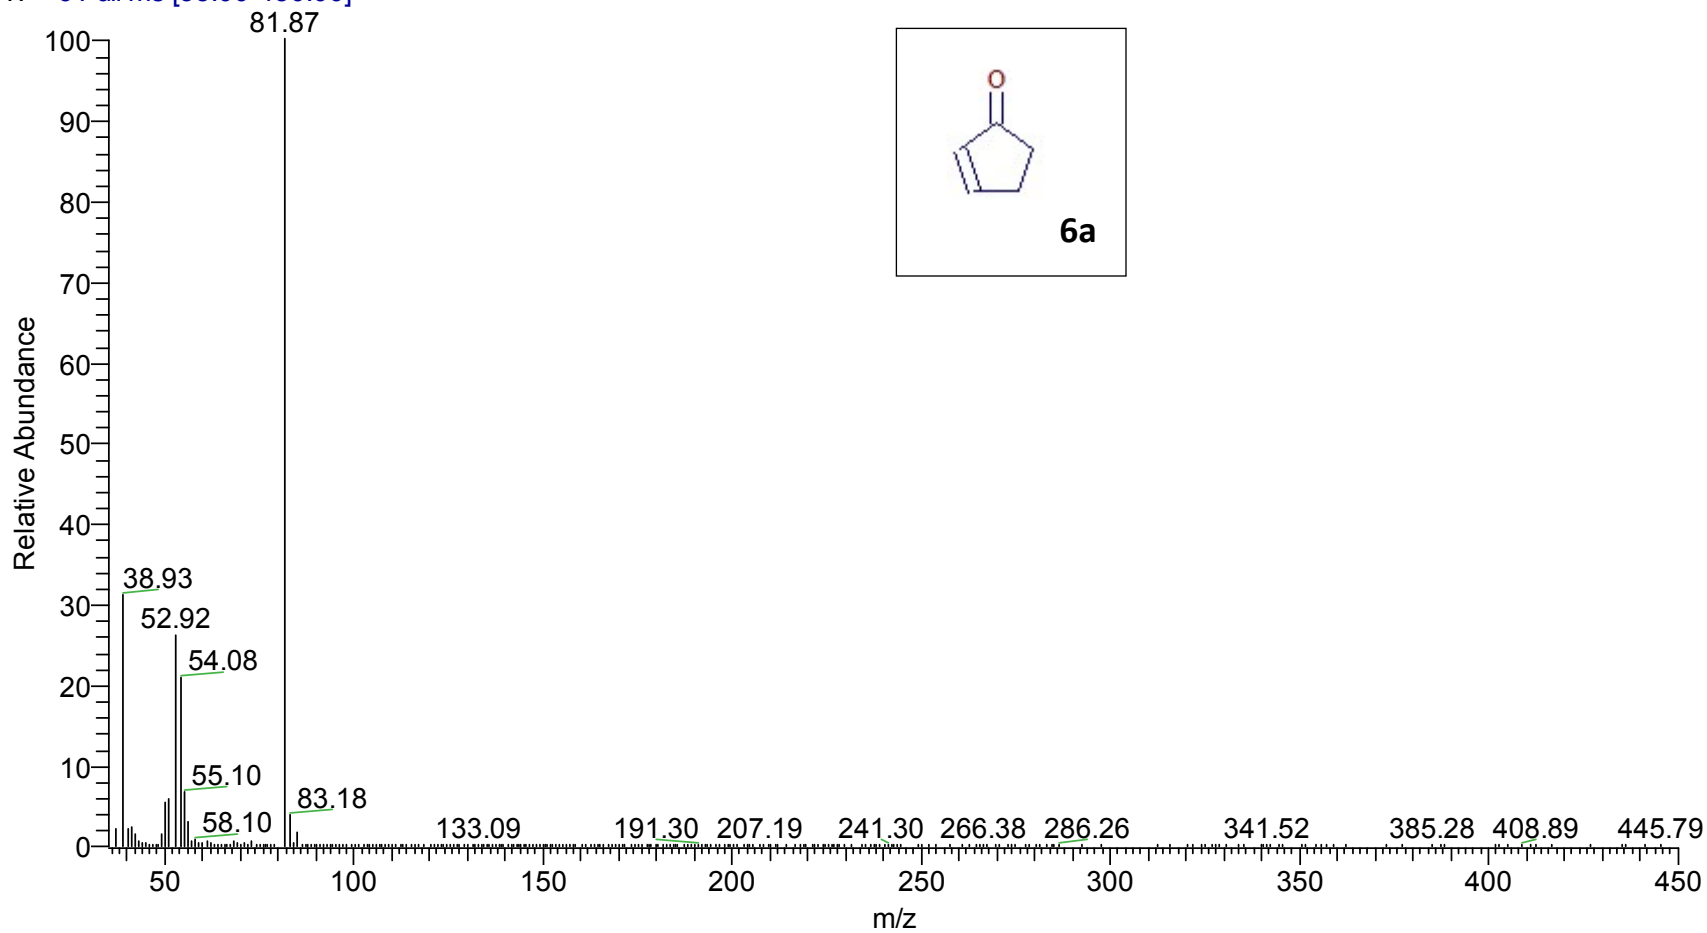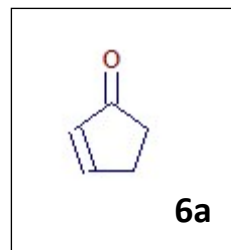

quadrelli139 #442 RT: 9.37 AV: 1 NL: 2.49E7  
T: + c Full ms [35.00-450.00]

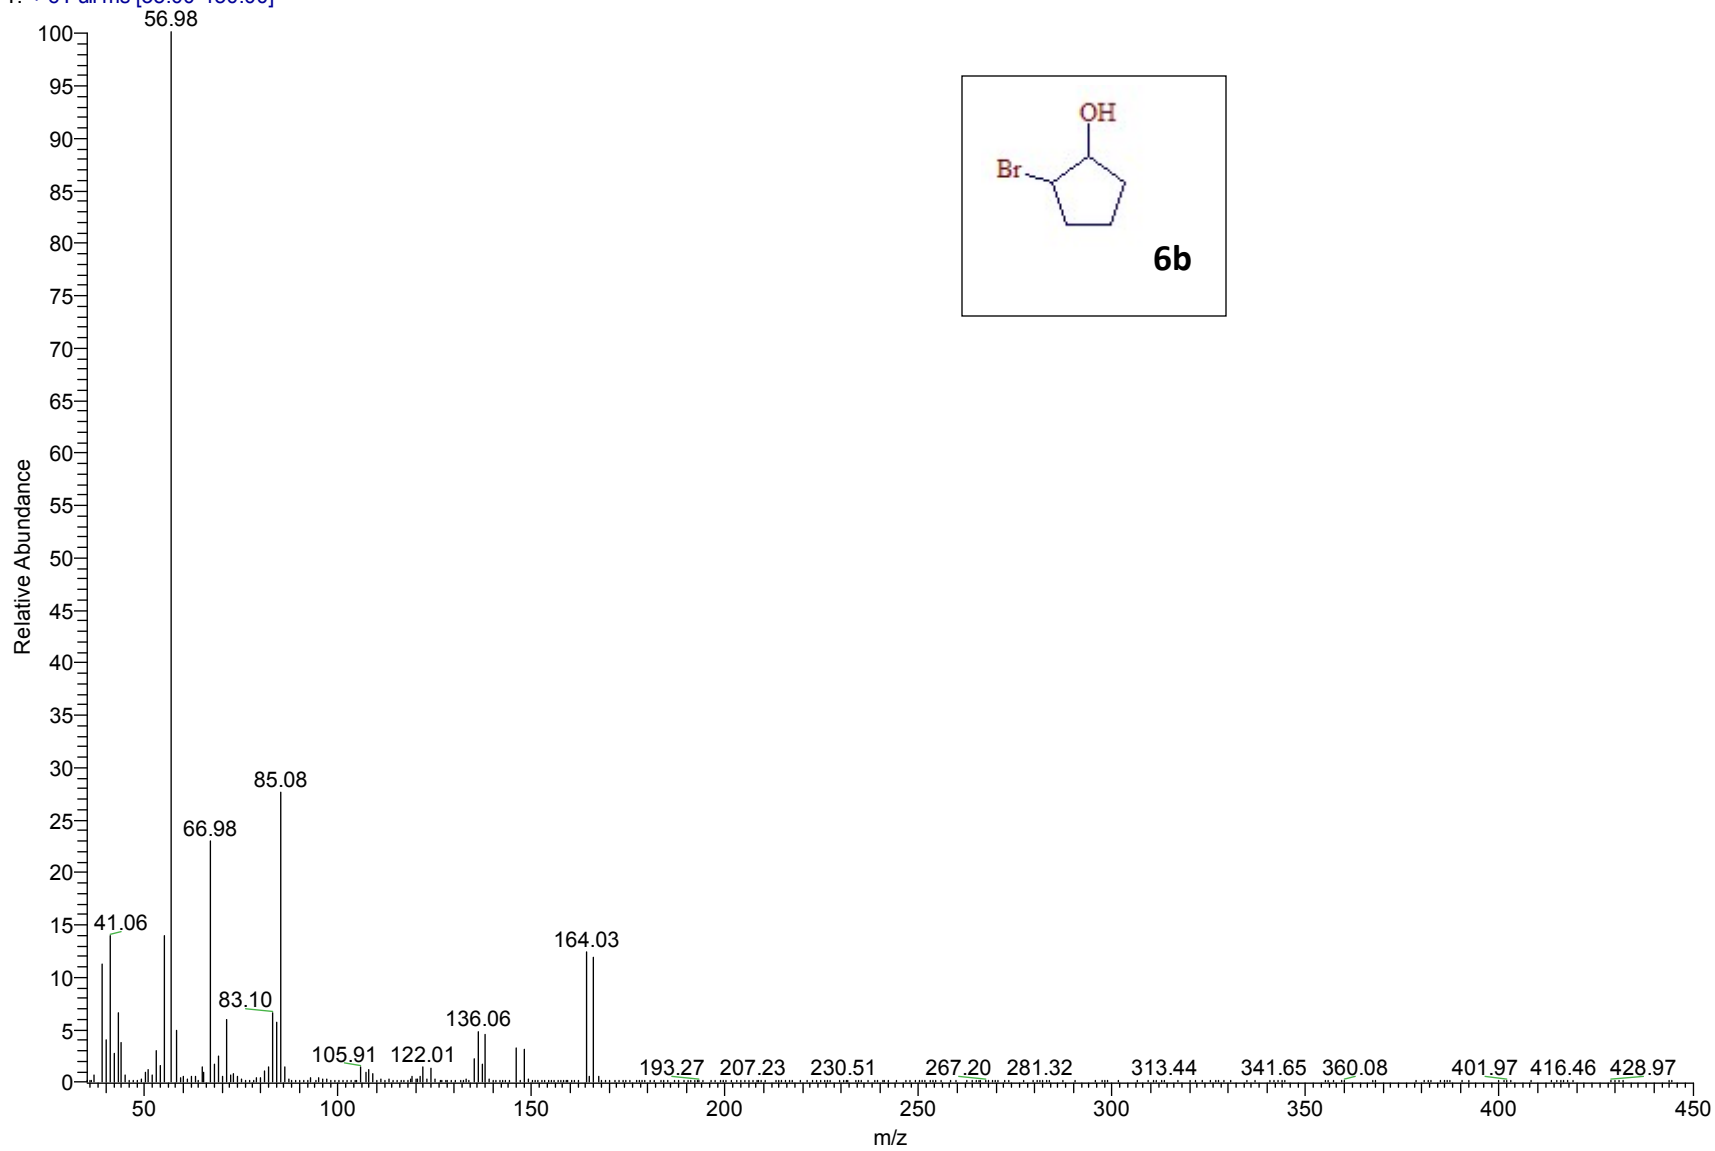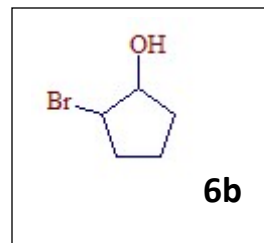

# C4, reaction with cyclohexene

RT: 0.00 - 30.02

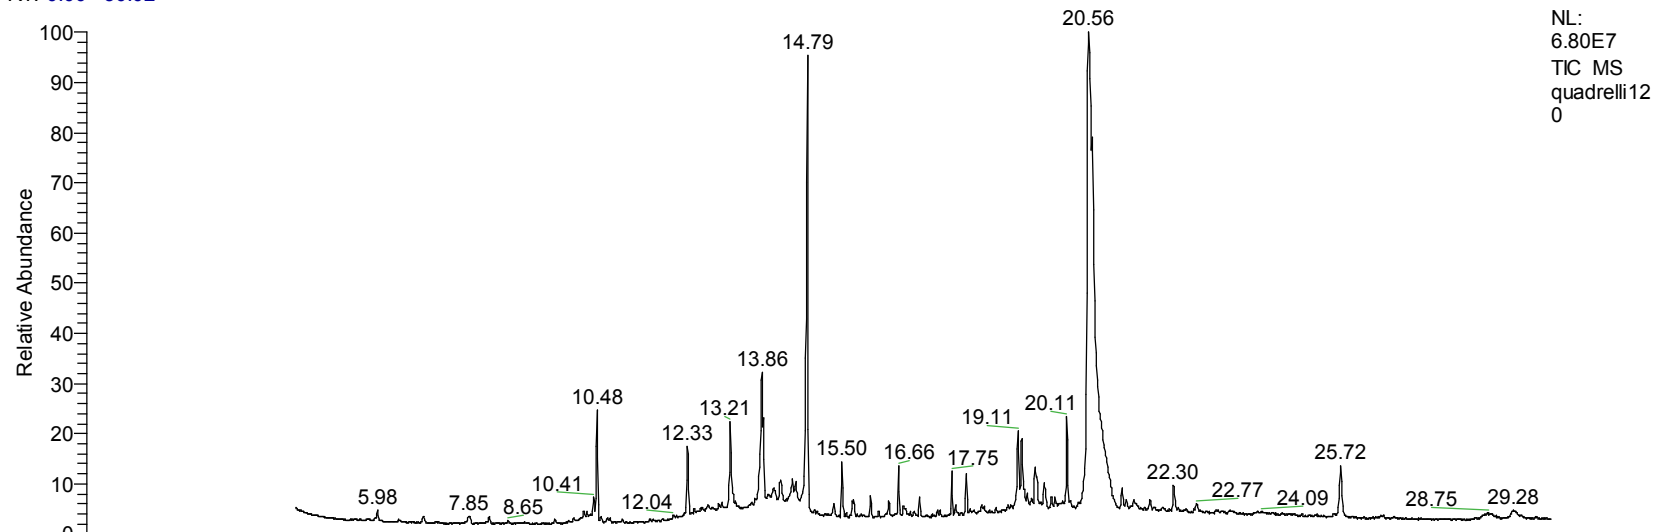

NL:  
6.80E7  
TIC MS  
quadrelli12  
0

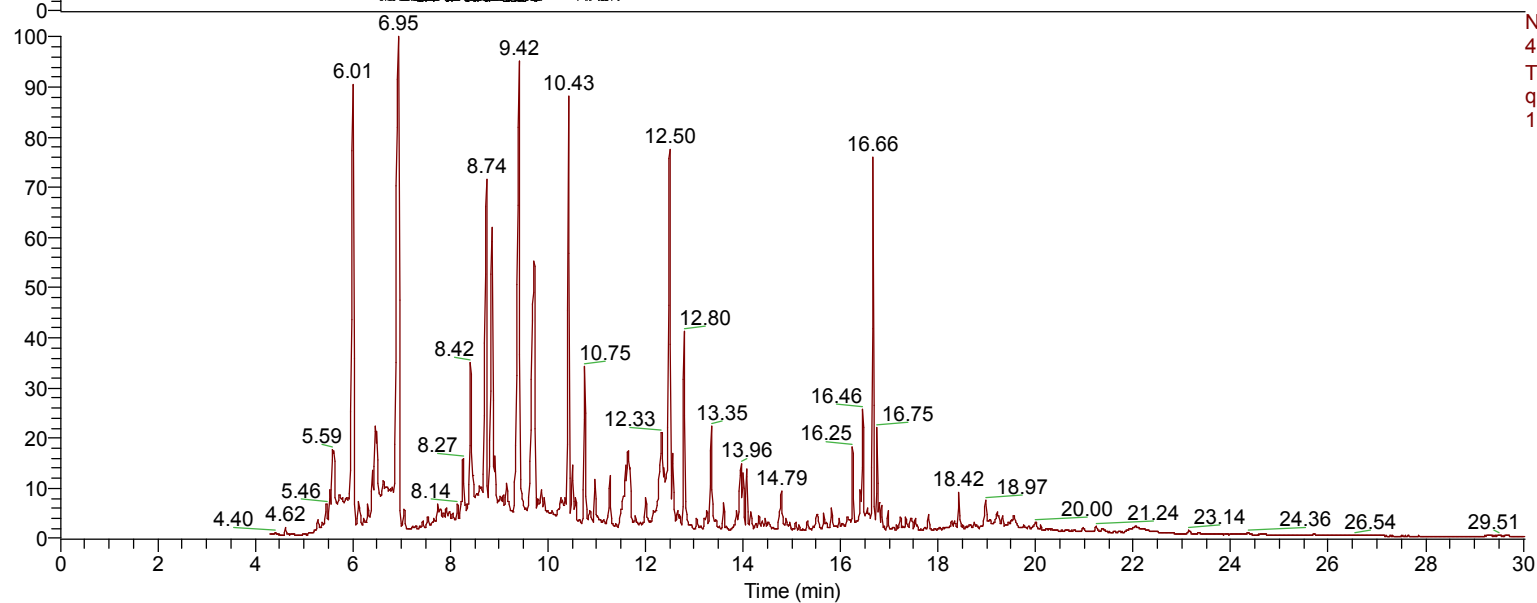

NL:  
4.60E8  
TIC MS  
quadrelli12  
1

quadrelli121 #149 RT: 6.00 AV: 1 NL: 7.30E7  
T: + c Full ms [35.00-450.00]

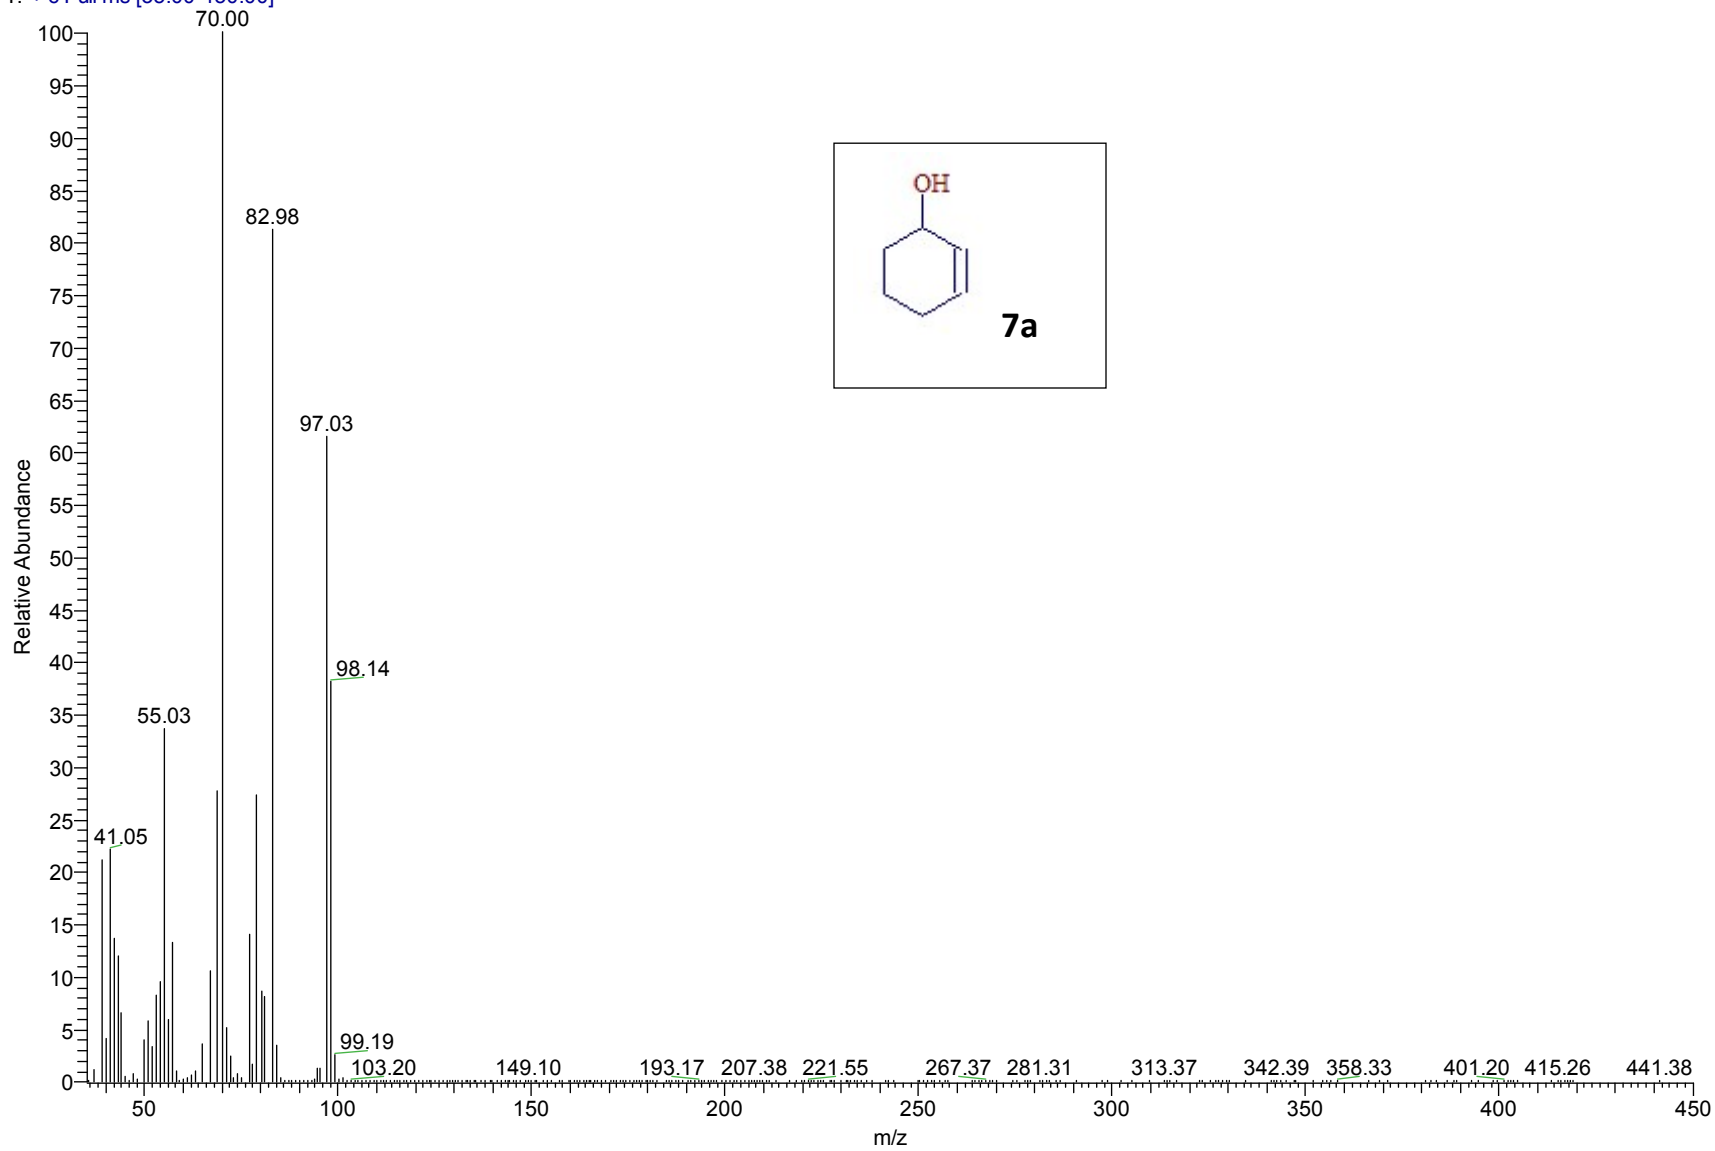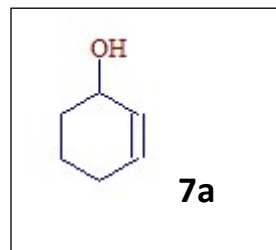

quadrelli121 #230 RT: 6.93 AV: 1 NL: 2.02E8  
T: + c Full ms [35.00-450.00]

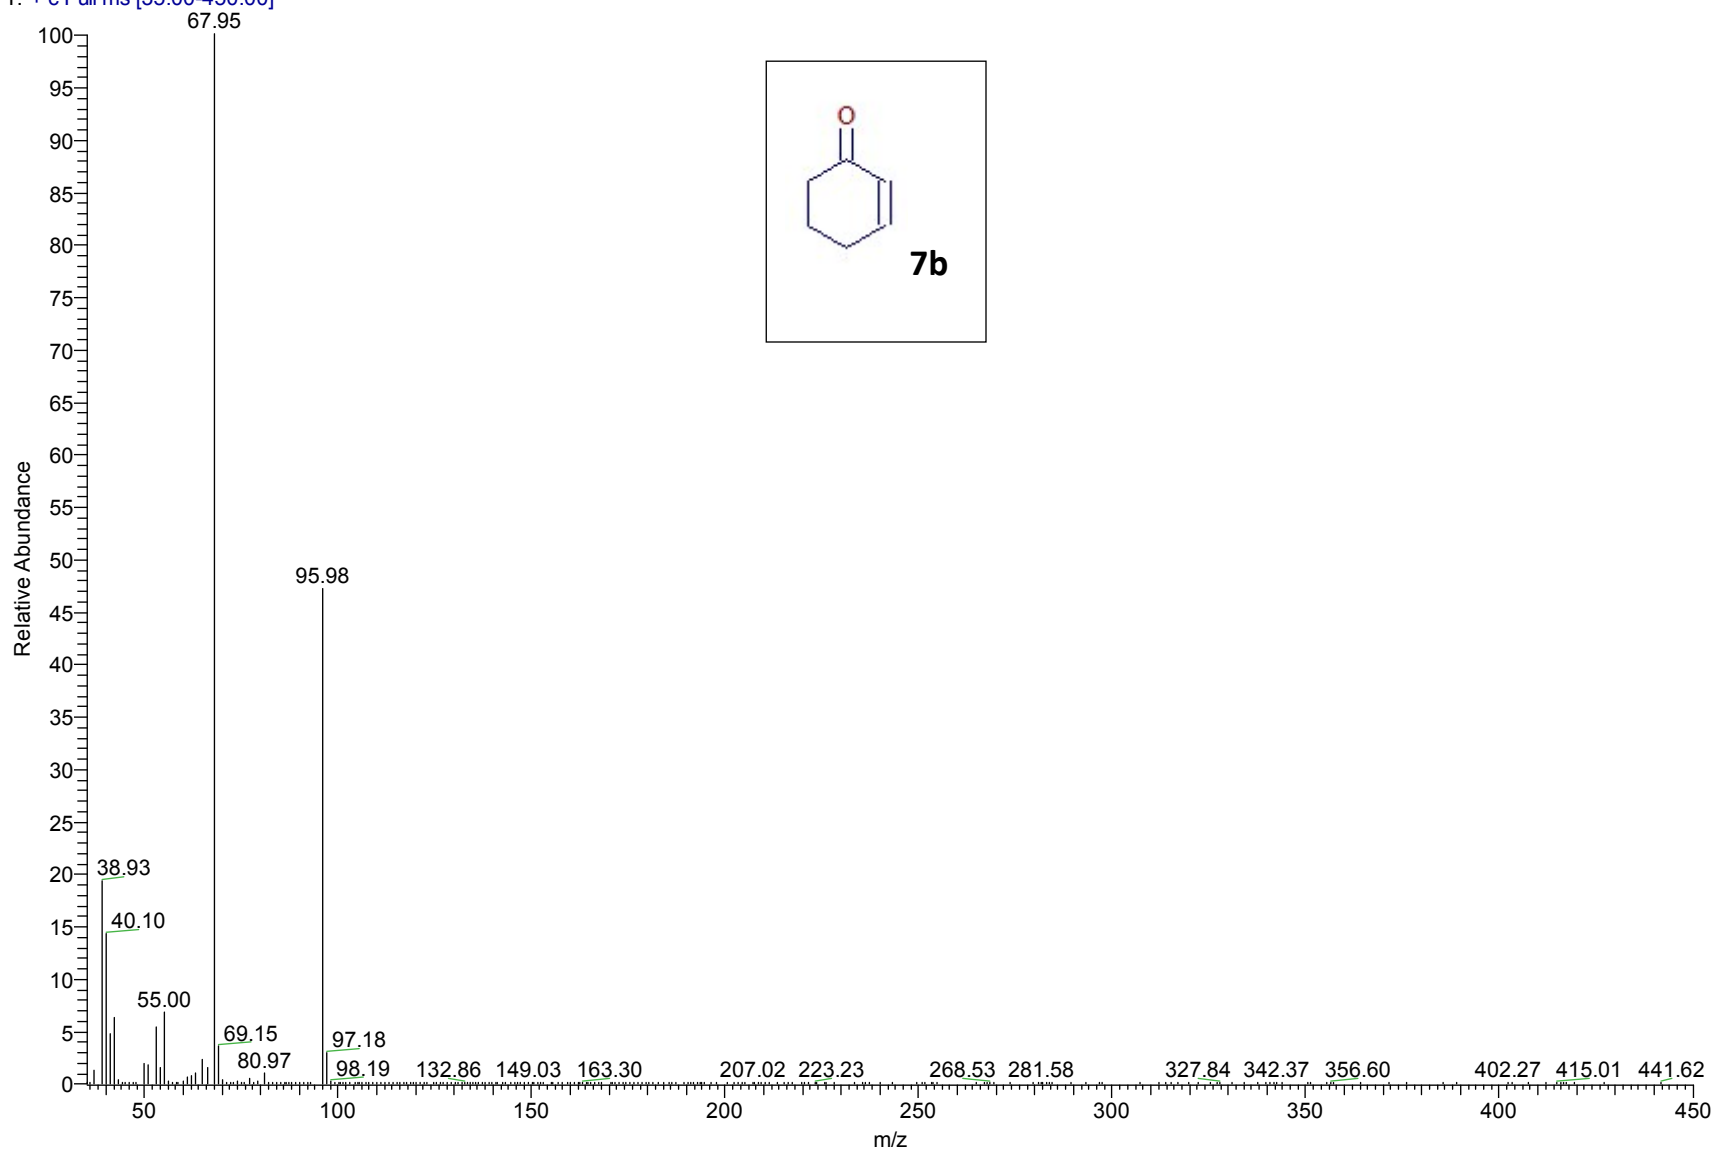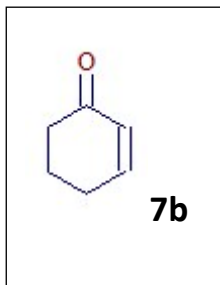

quadrelli121 #385 RT: 8.72 AV: 1 NL: 7.32E7  
T: + c Full ms [35.00-450.00]

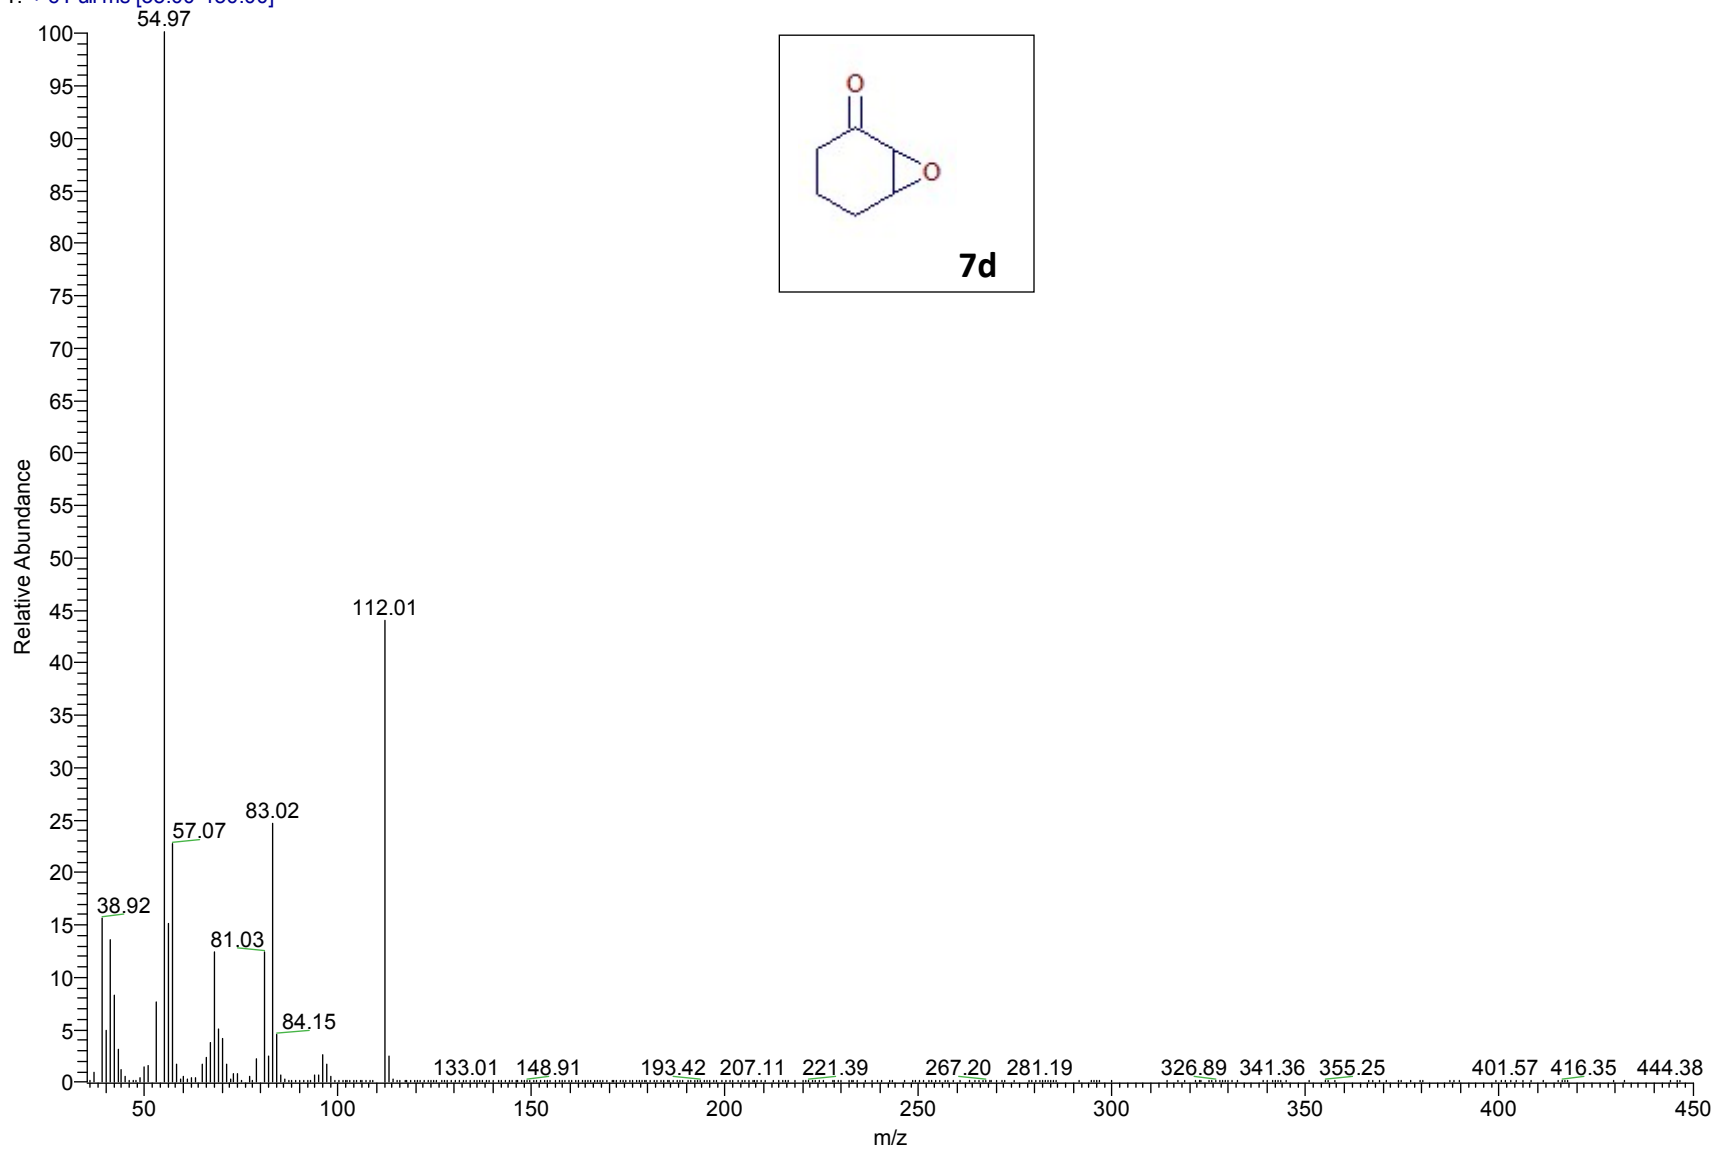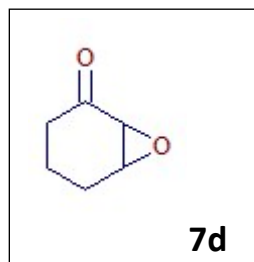



quadrelli121 #396 RT: 8.84 AV: 1 NL: 6.01E7  
T: + c Full ms [35.00-450.00]

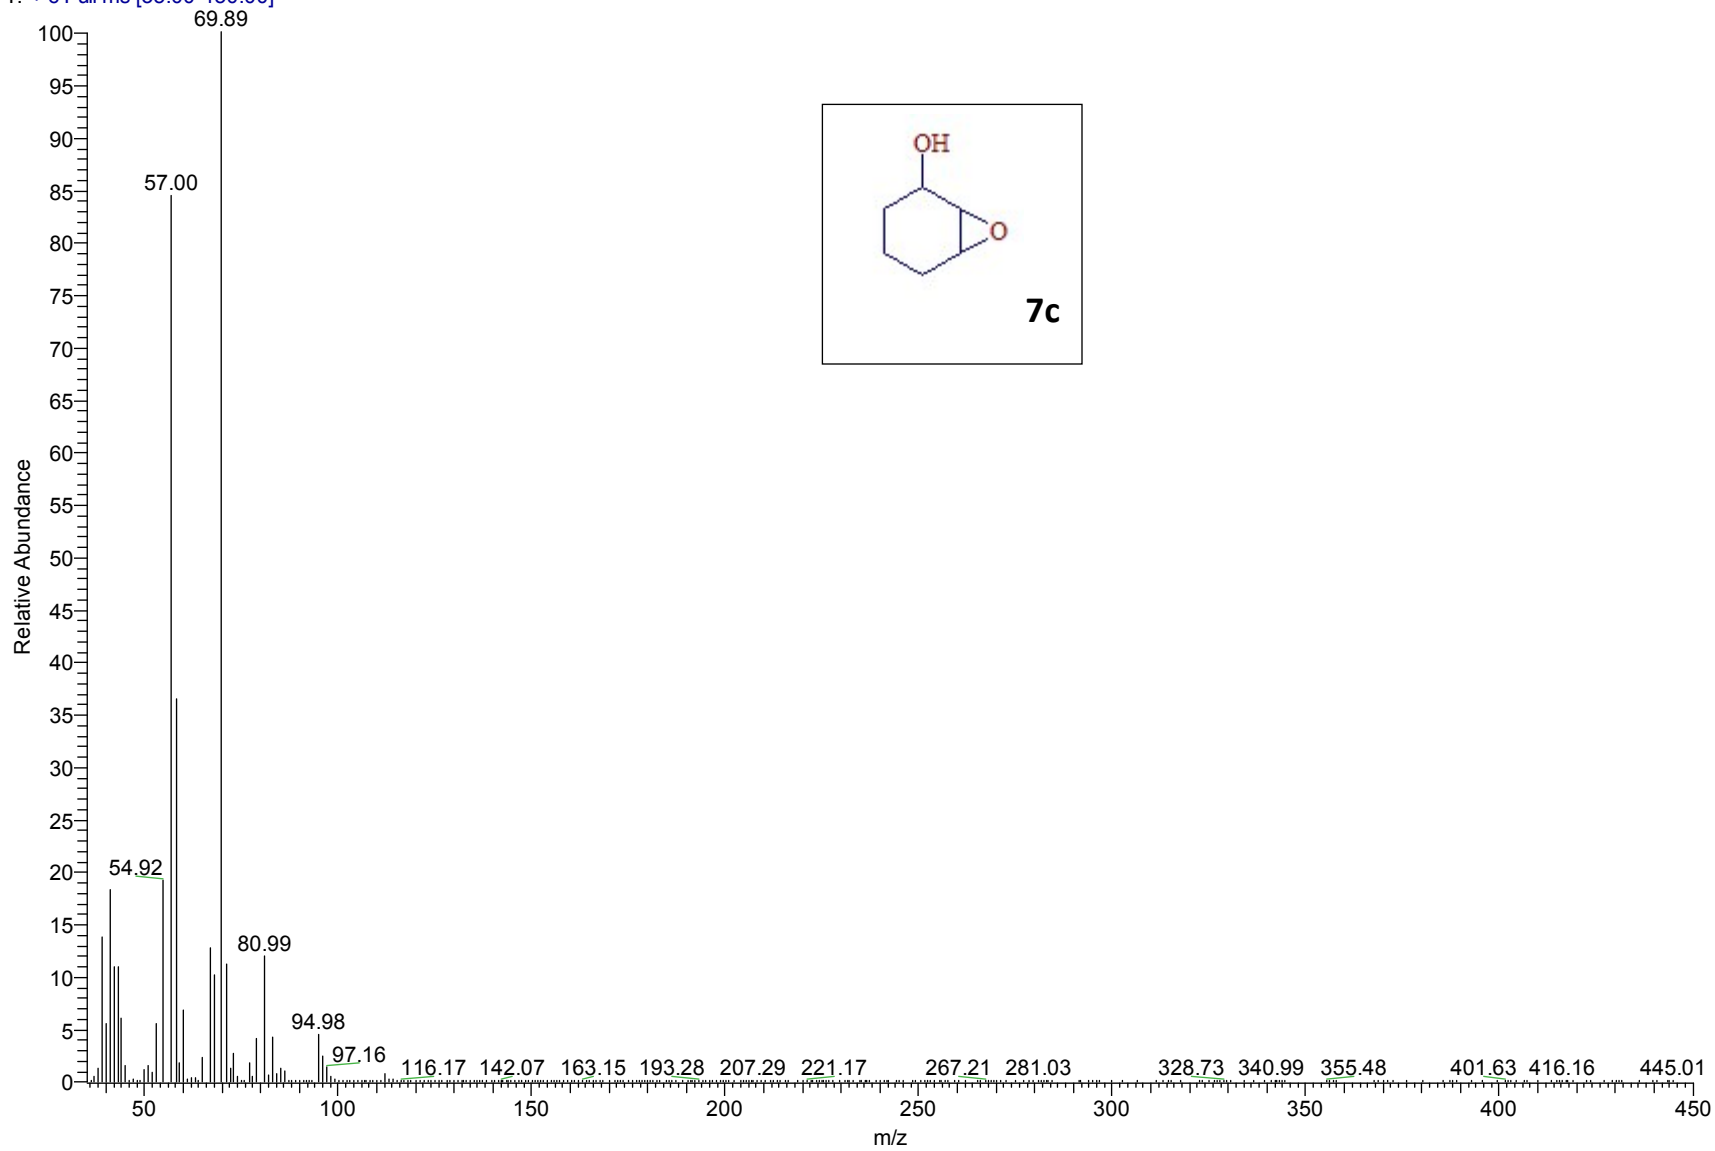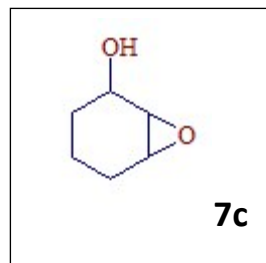

quadrelli121 #534 RT: 10.43 AV: 1 NL: 1.58E8

T: + c Full ms [35.00-450.00]

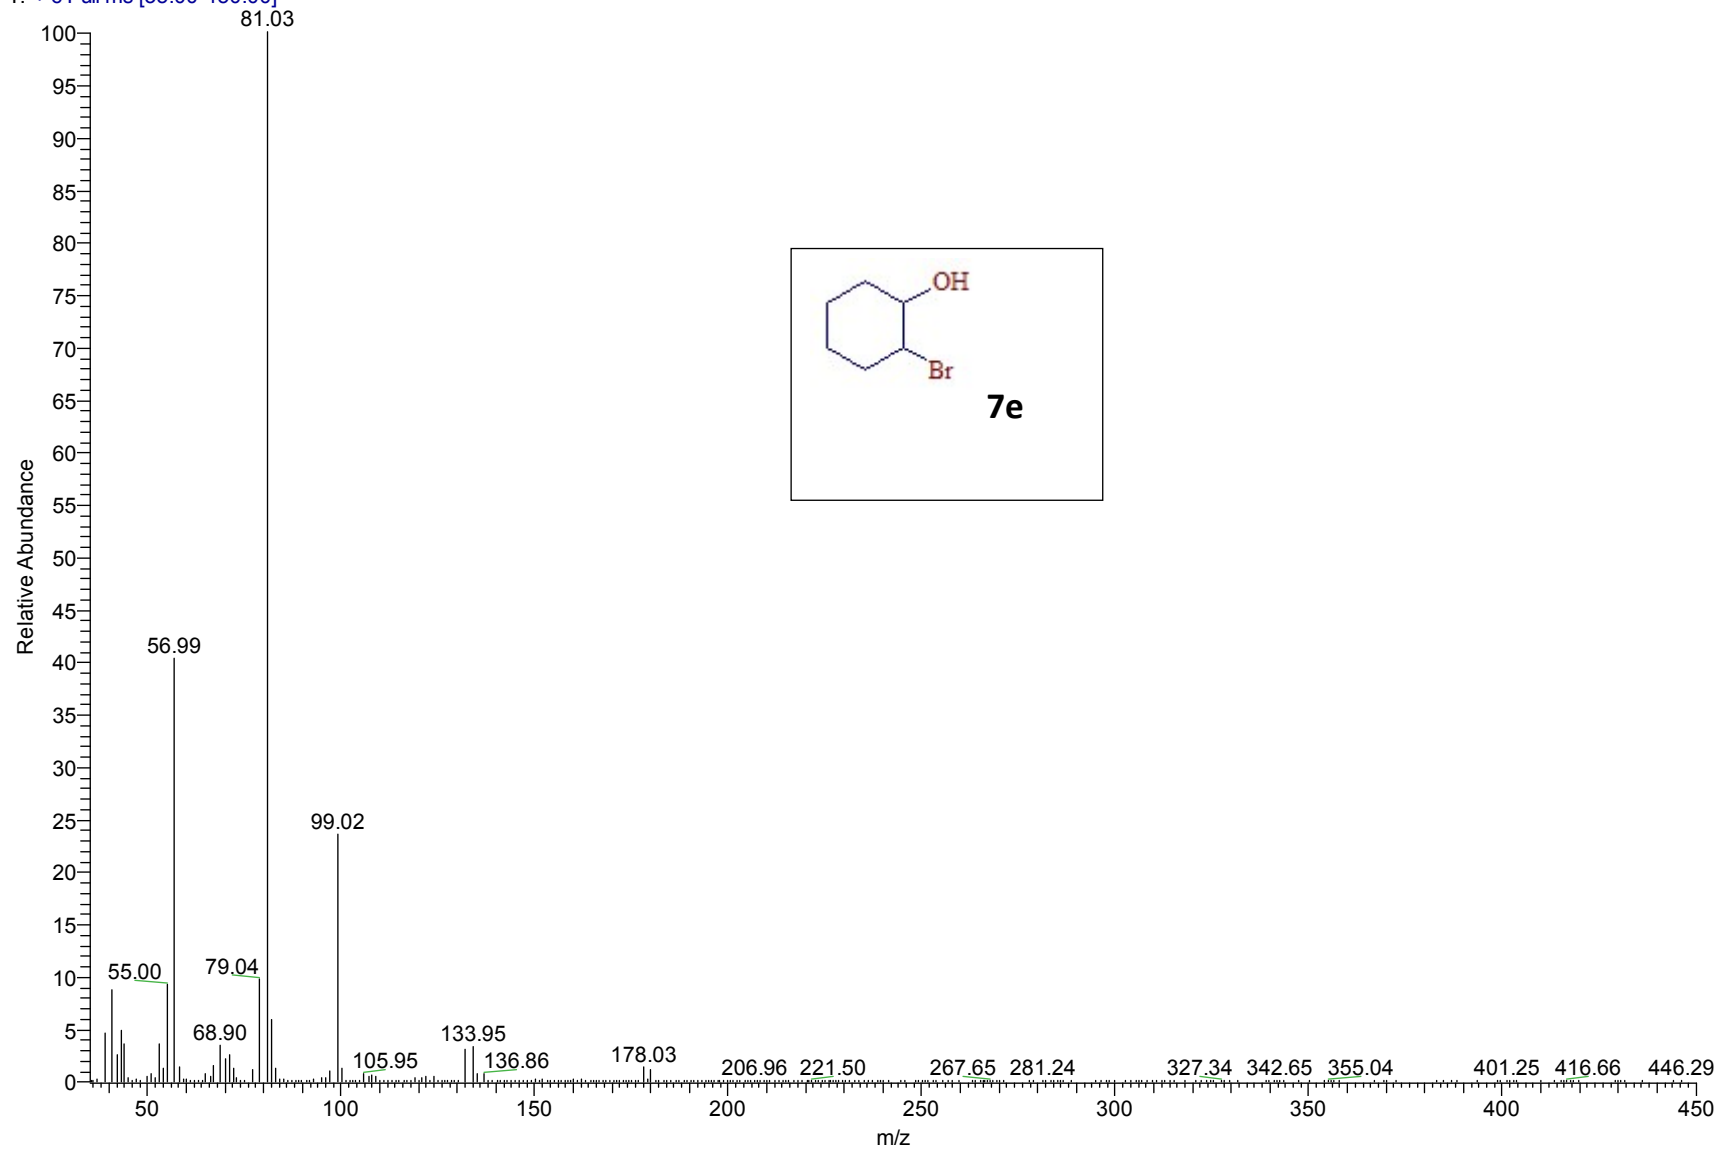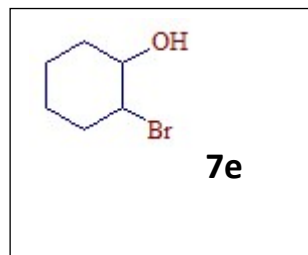

quadrelli121 #714 RT: 12.50 AV: 1 NL: 1.84E8  
T: + c Full ms [35.00-450.00]

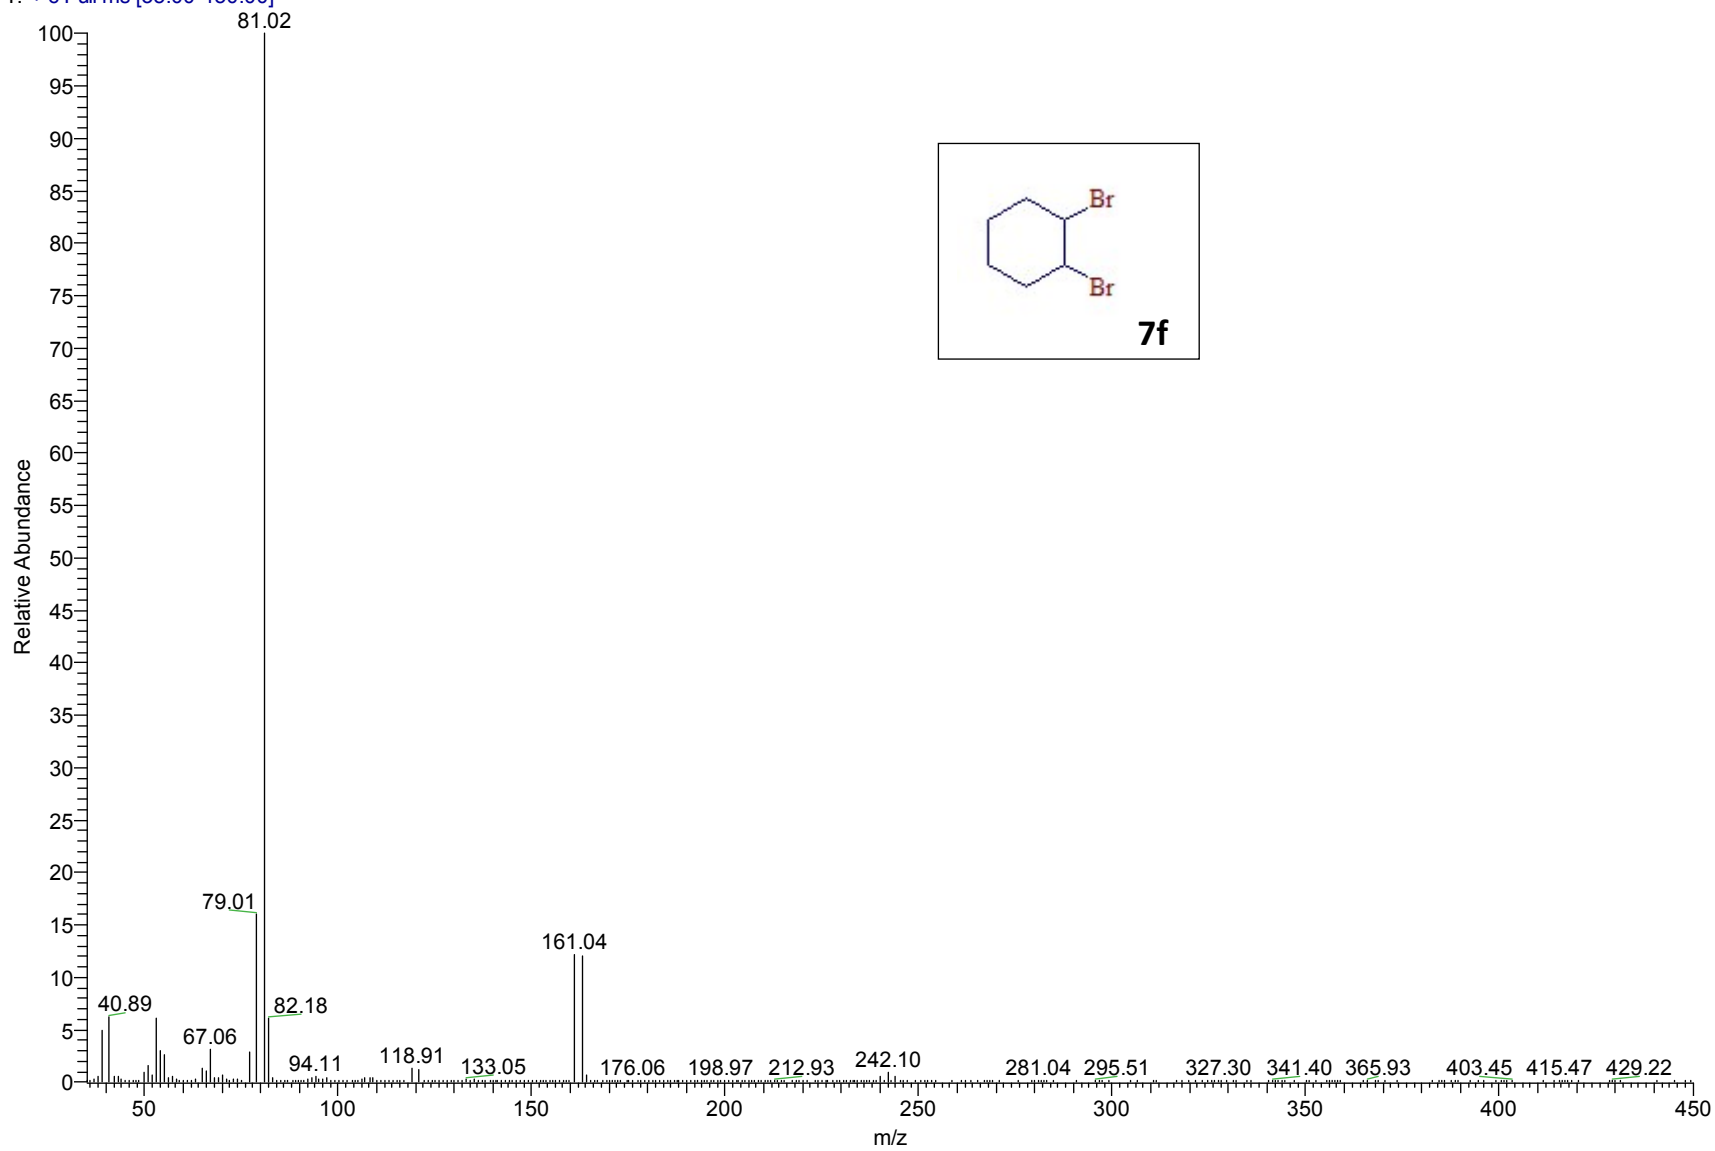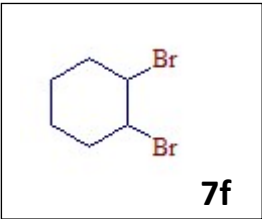

**C4**, reaction with cyclooptene

RT: 0.00 - 30.04

NL:  
6.08E8  
TIC MS  
quadrelli10  
6

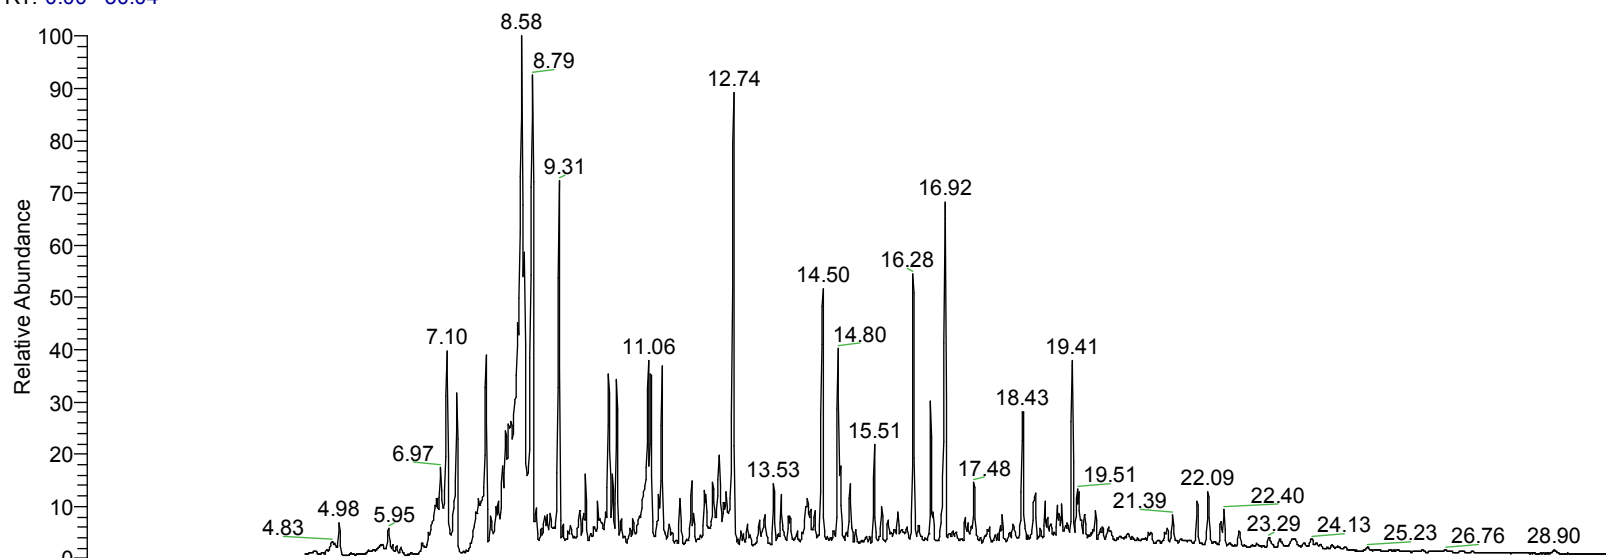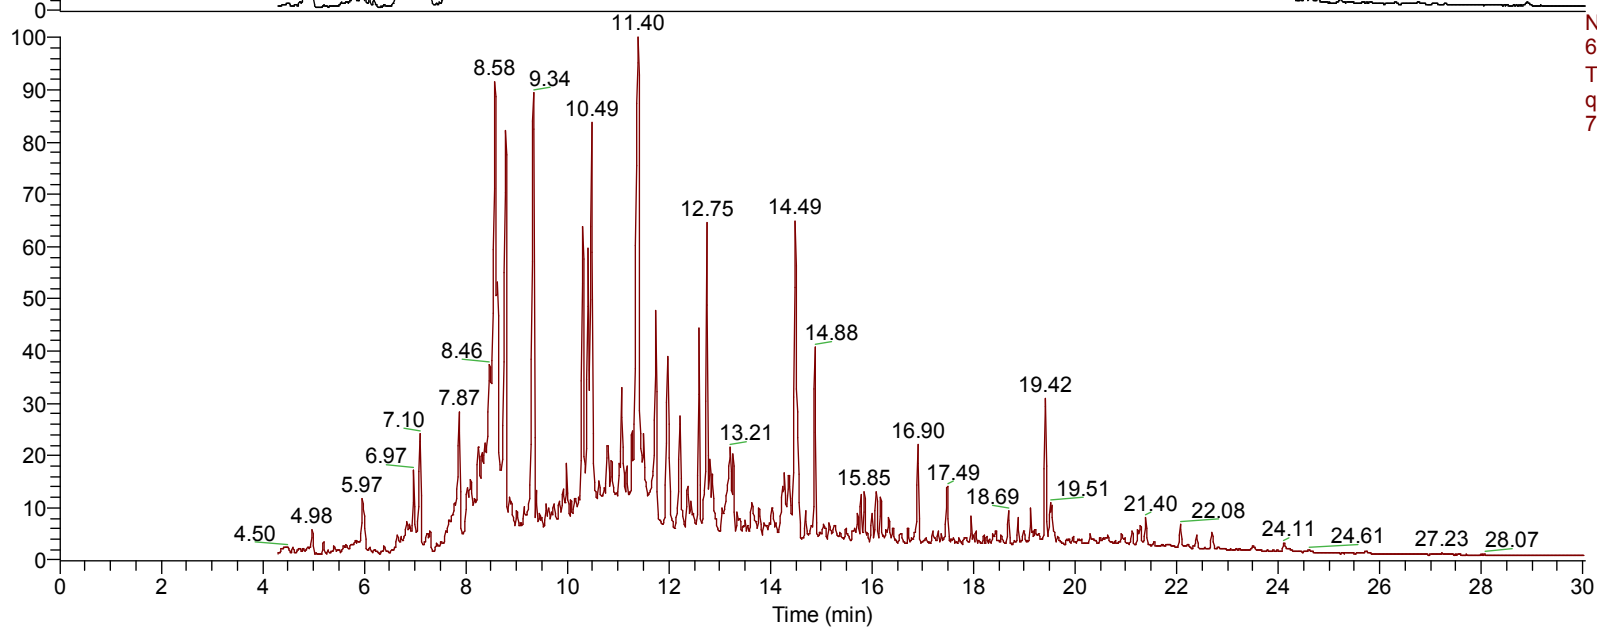

quadrelli95 #316 RT: 7.92 AV: 1 NL: 8.13E7  
T: + c Full ms [35.00-450.00]

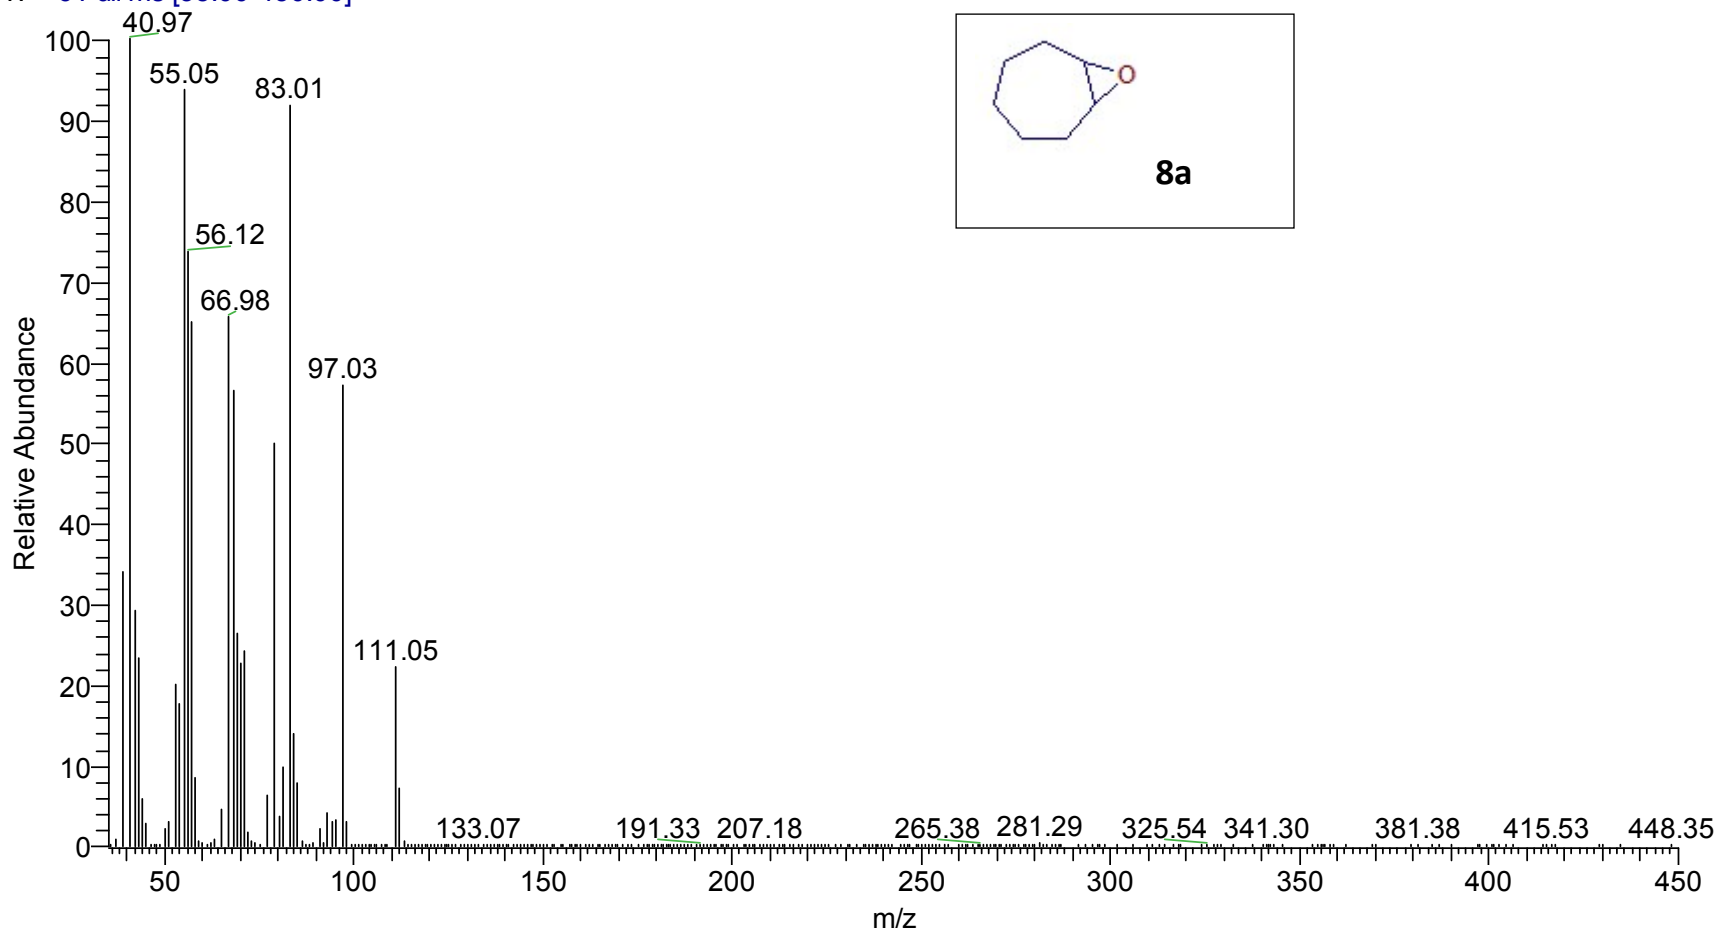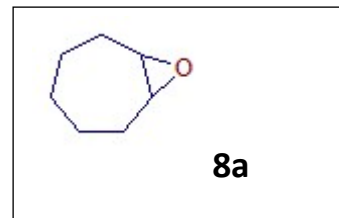

quadrelli95 #445 RT: 9.41 AV: 1 NL: 1.65E8  
T: + c Full ms [35.00-450.00]

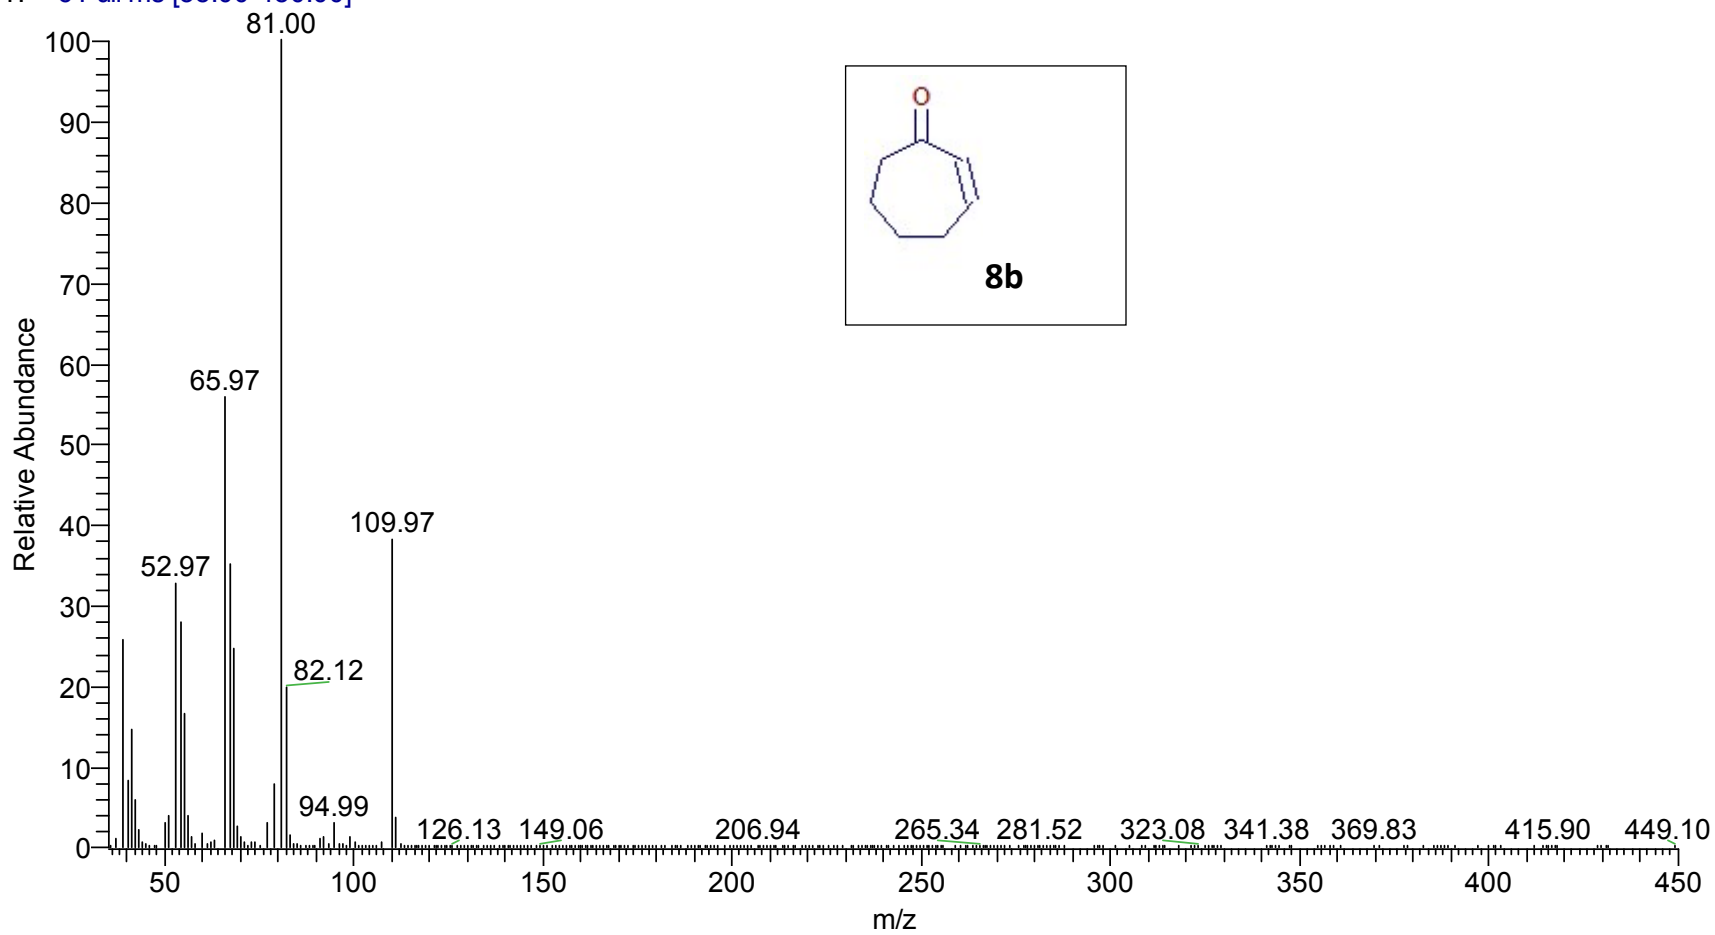

quadrelli188 #666 RT: 11.95 AV: 1 NL: 2.82E7  
T: + c Full ms [35.00-450.00]

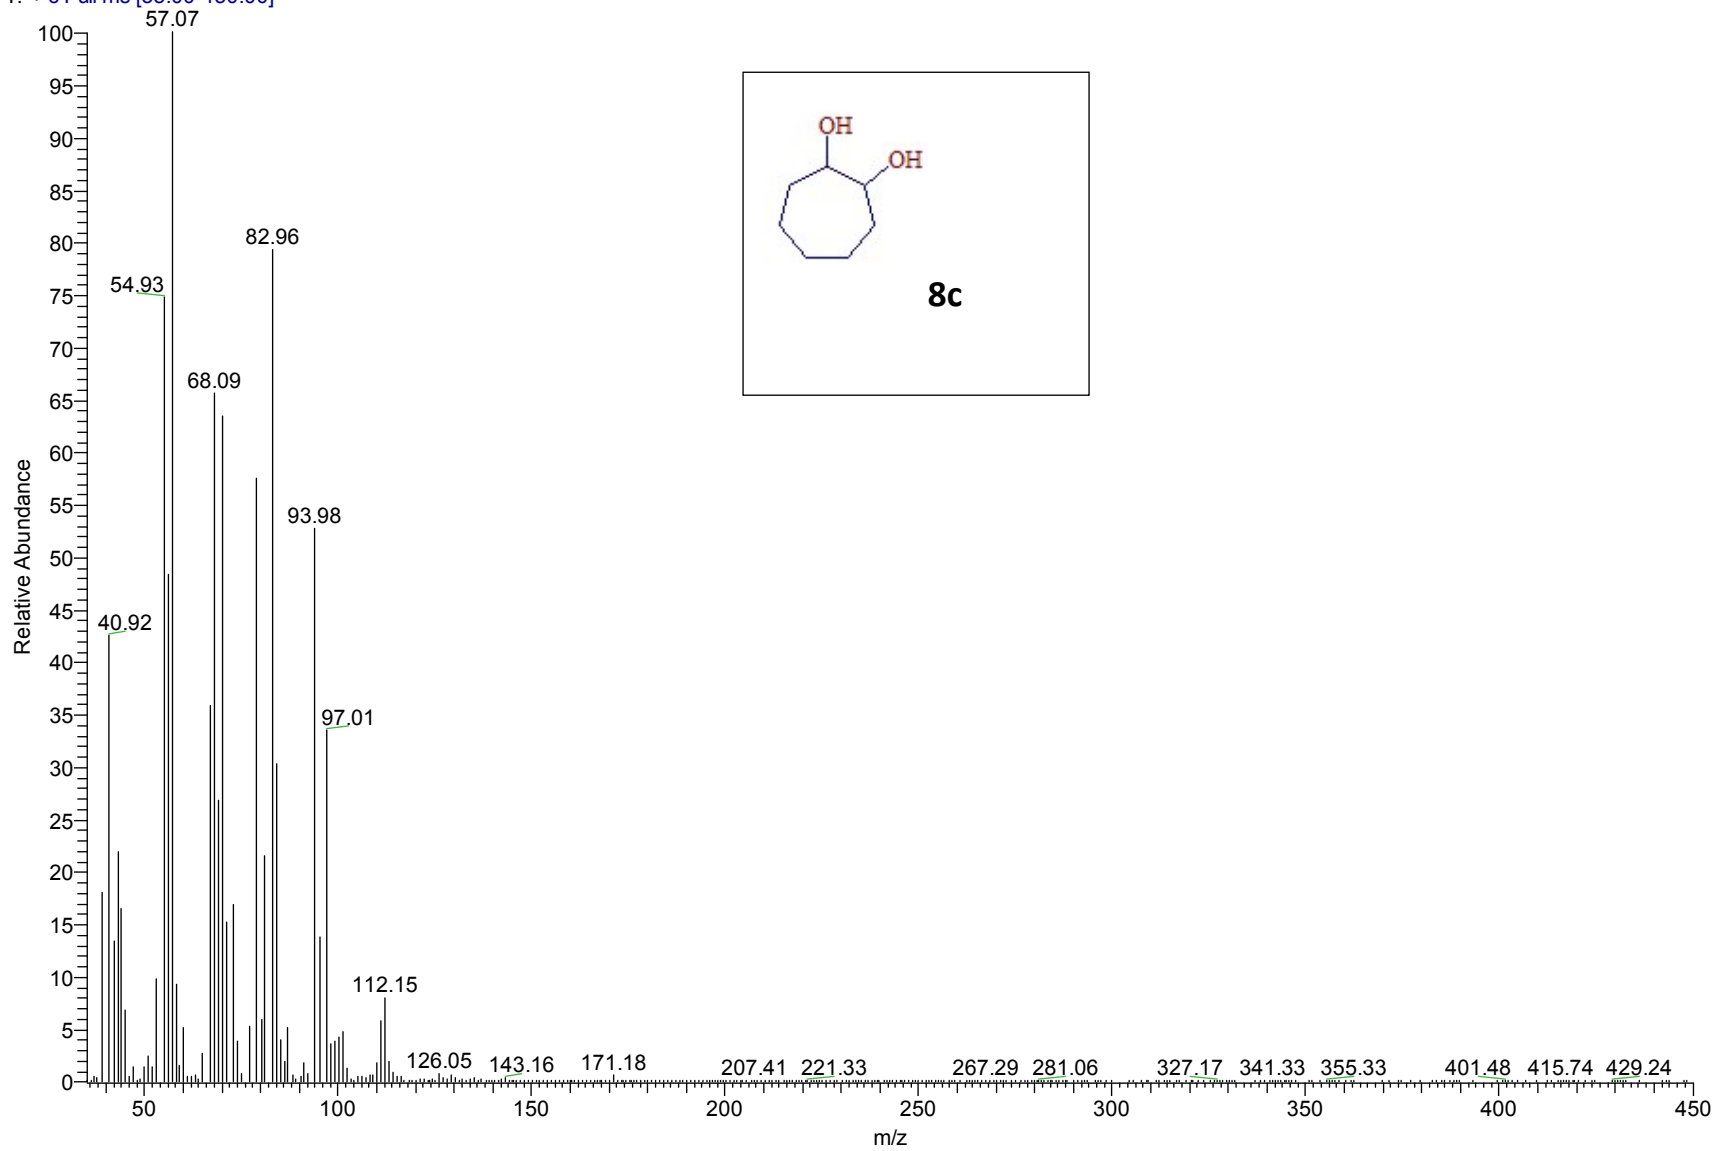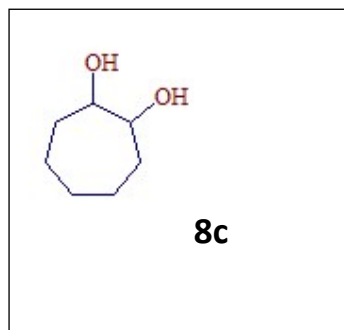

**C4**, reaction with cyclooctene

RT: 0.00 - 30.02

NL:  
5.82E8  
TIC MS  
quadrelli10  
3

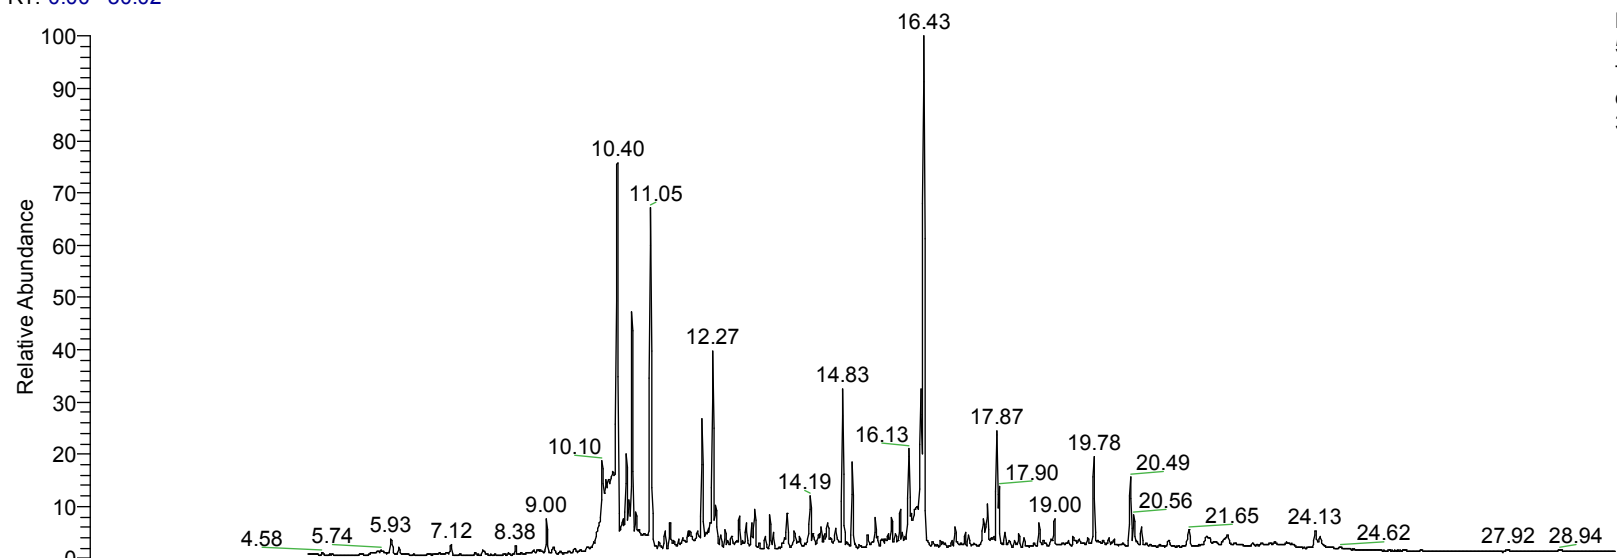

NL:  
6.74E8  
TIC MS  
quadrelli10  
5

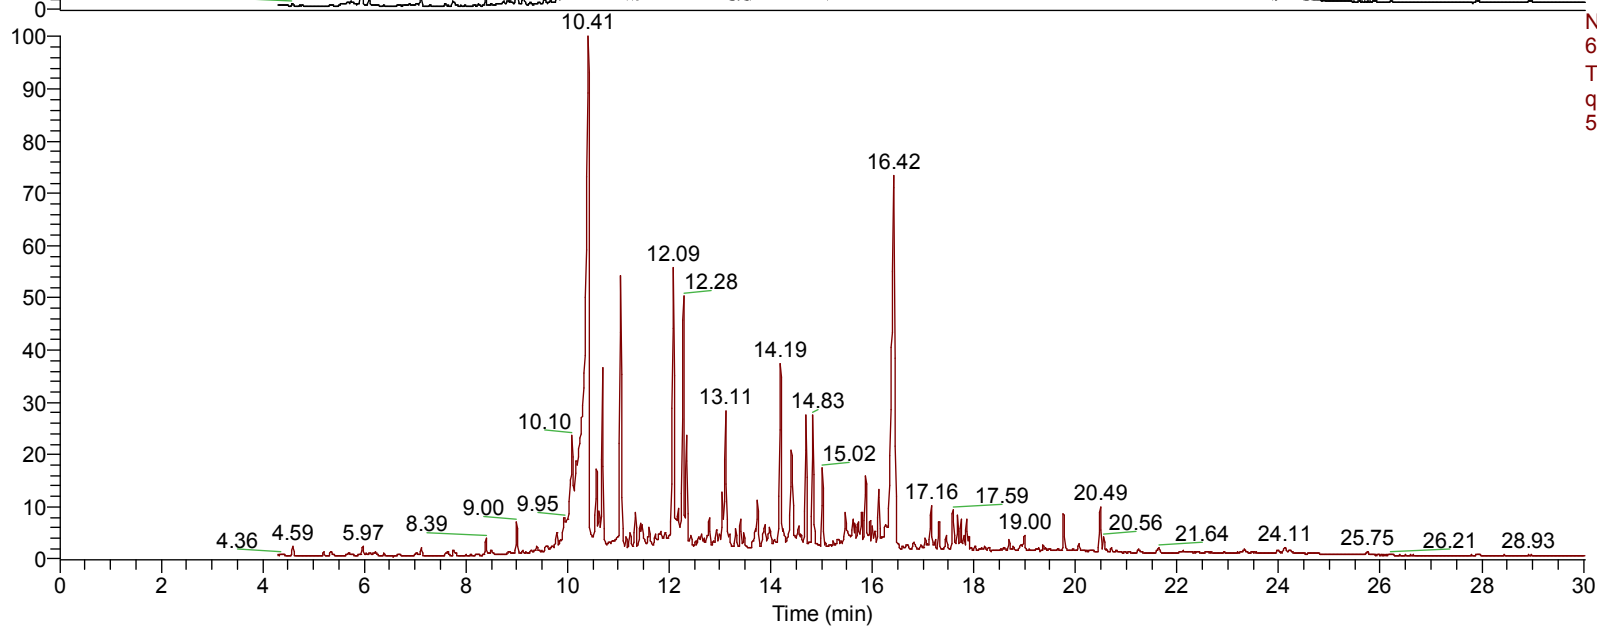



quadrelli105 #532 RT: 10.41 AV: 1 NL: 1.01E8  
T: + c Full ms [35.00-450.00]

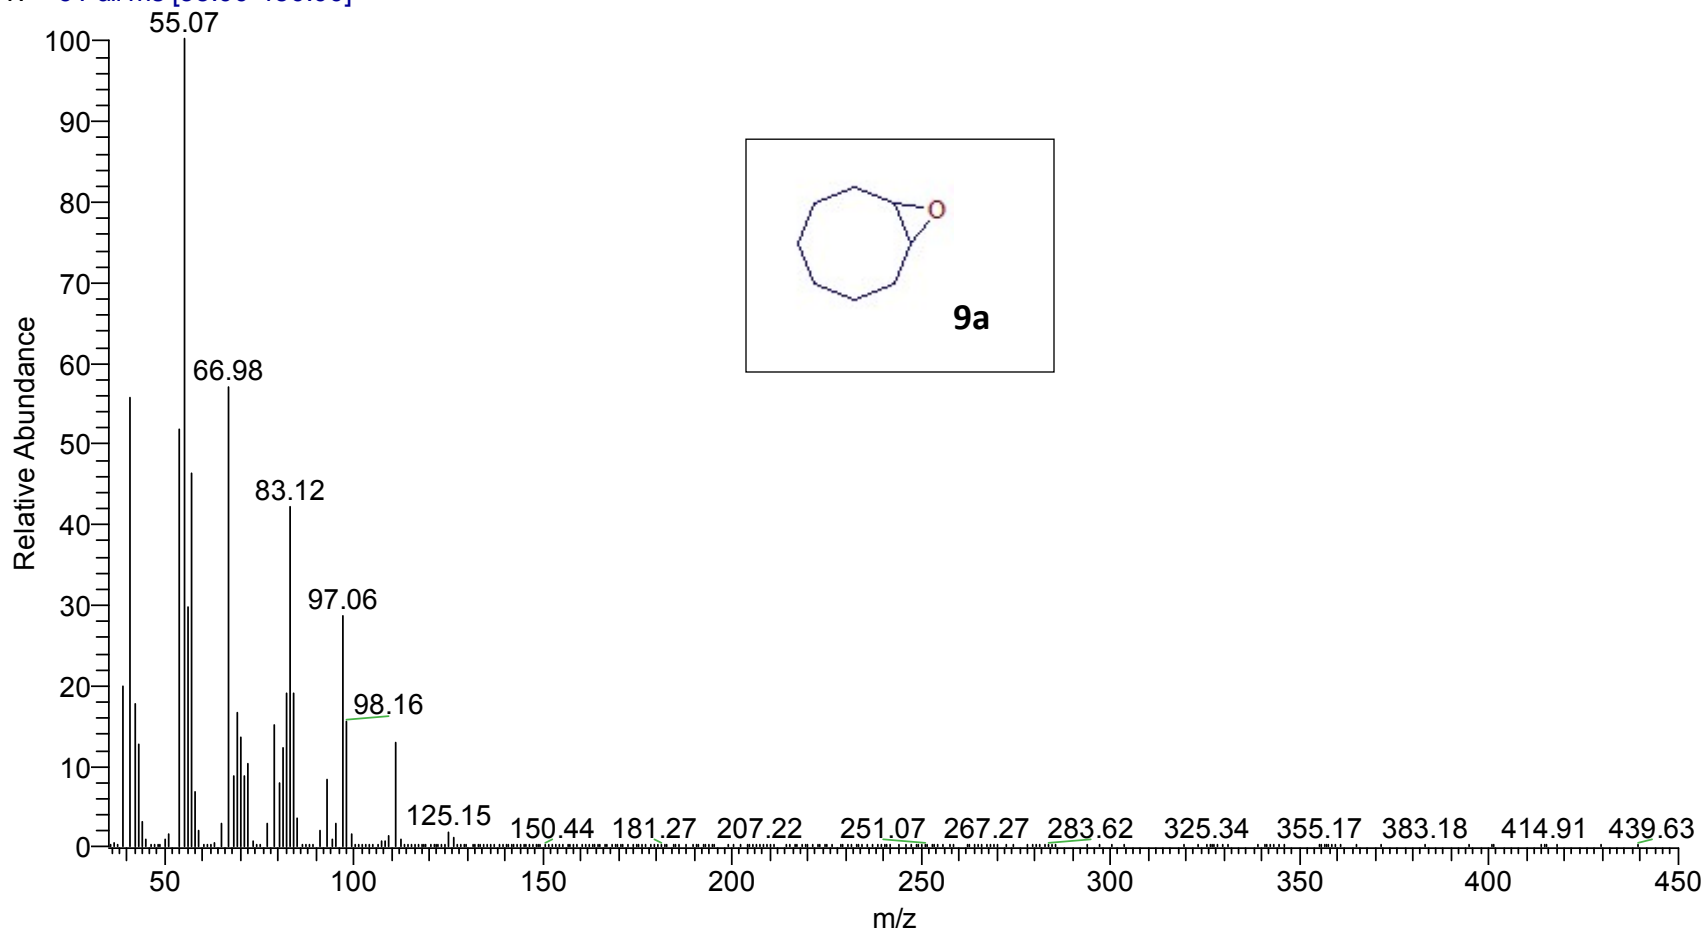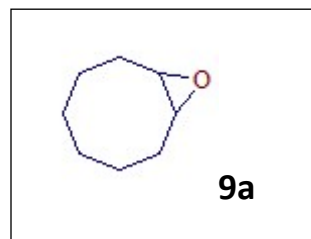

quadrelli94 #704 RT: 11.09 AV: 1 NL: 1.55E8

T: + c Full ms [35.00-450.00]

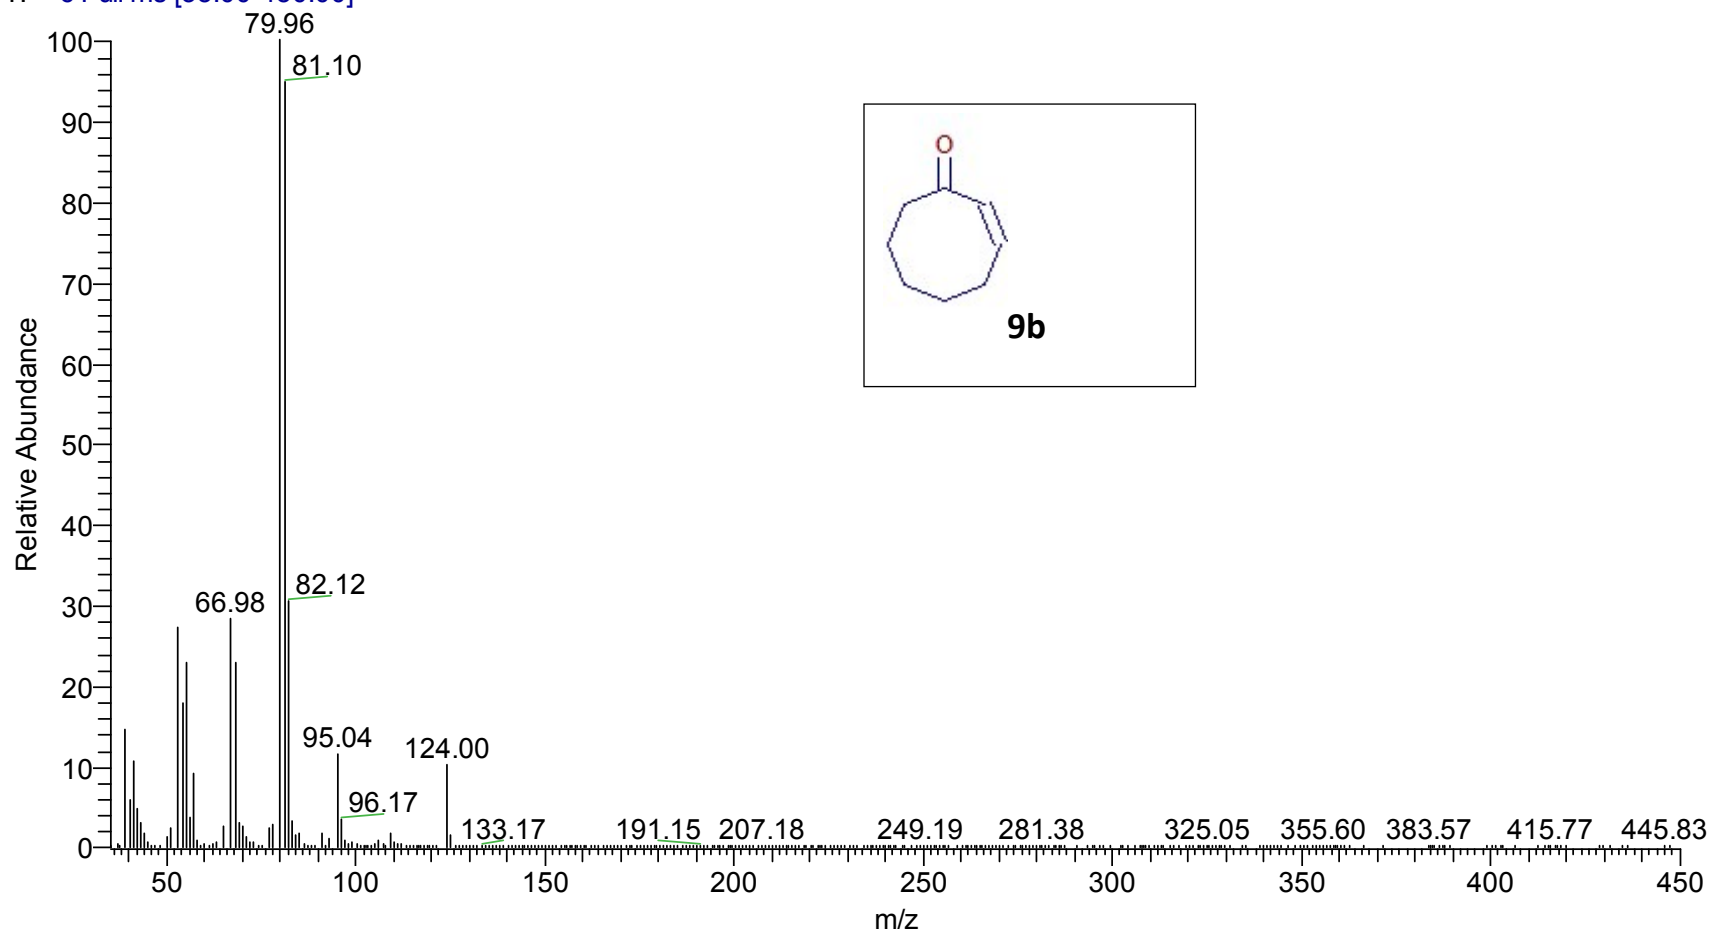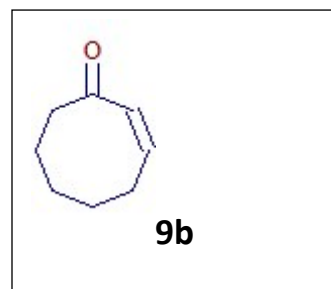

quadrelli105 #695 RT: 12.28 AV: 1 NL: 6.87E7  
T: + c Full ms [35.00-450.00]

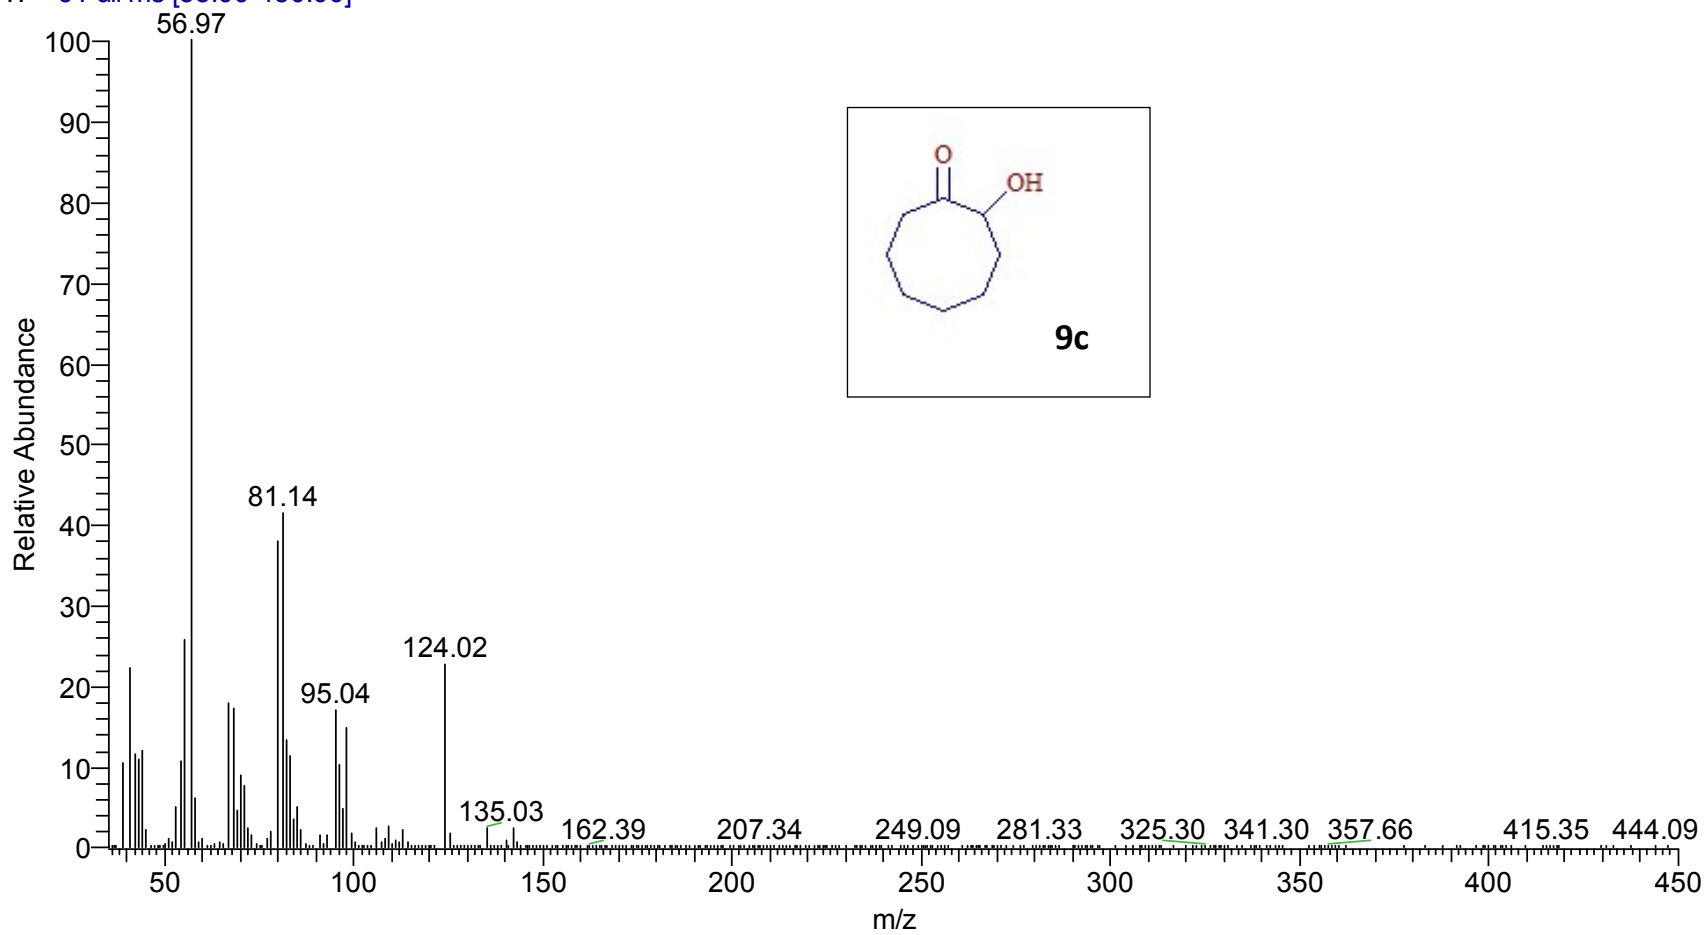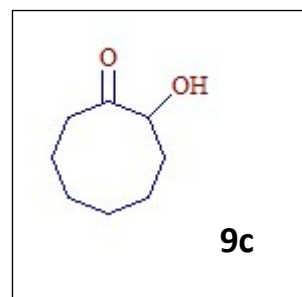

**C4**, reaction with indene

RT: 0.00 - 30.01

NL:  
1.37E9  
TIC MS  
quadrelli15  
6

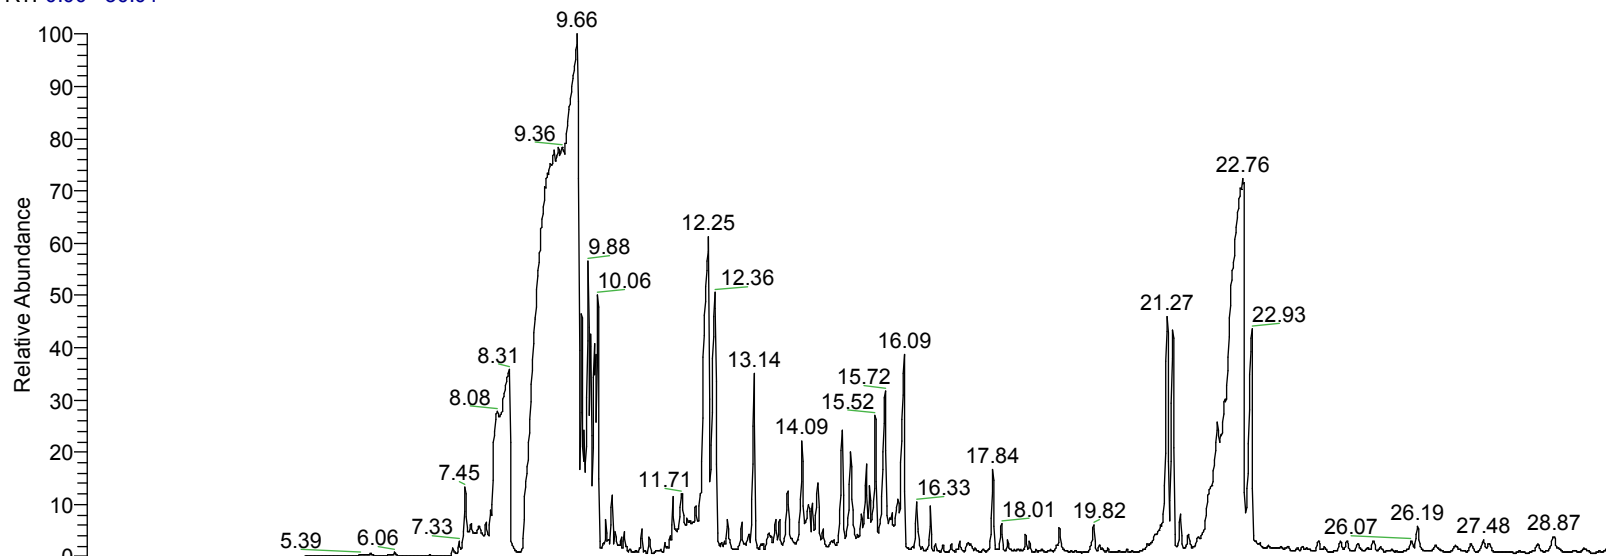

NL:  
3.04E8  
TIC MS  
quadrelli15  
7

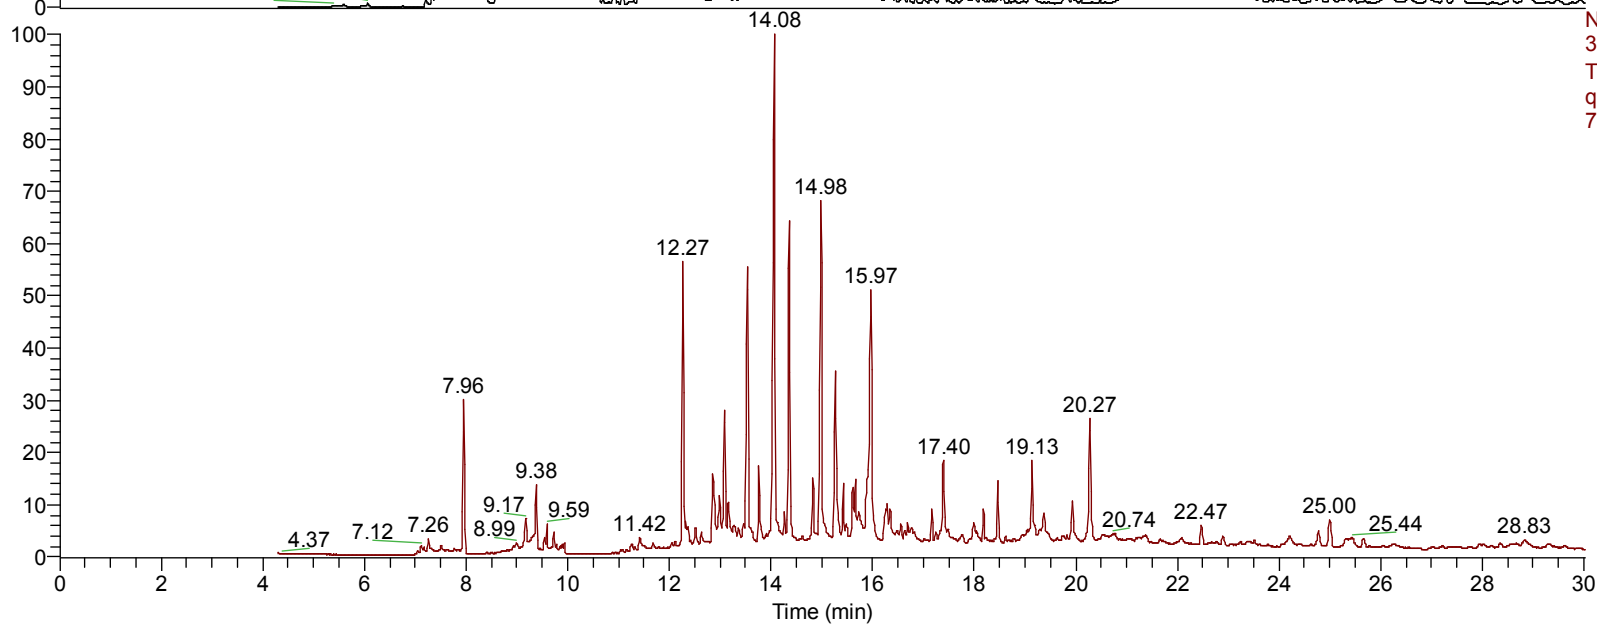

quadrelli157 #930 RT: 14.98 AV: 1 NL: 3.22E7  
T: + c Full ms [35.00-450.00]

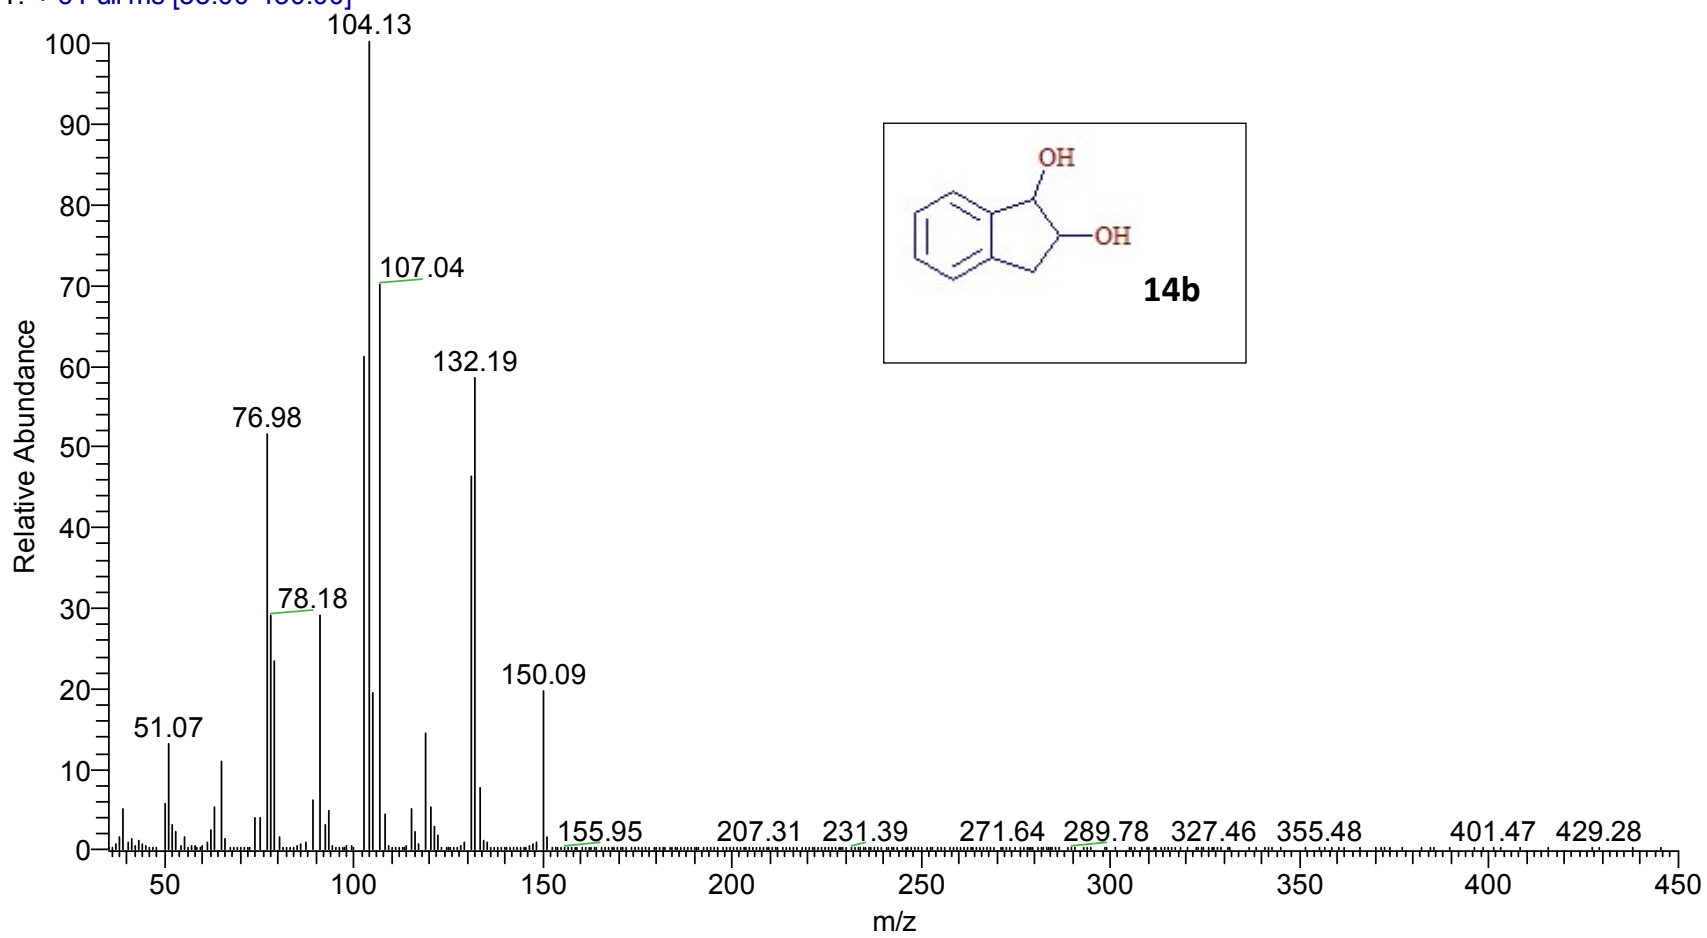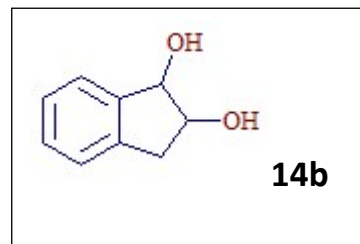

quadrelli157 #694 RT: 12.27 AV: 1 NL: 5.30E7  
T: + c Full ms [35.00-450.00]

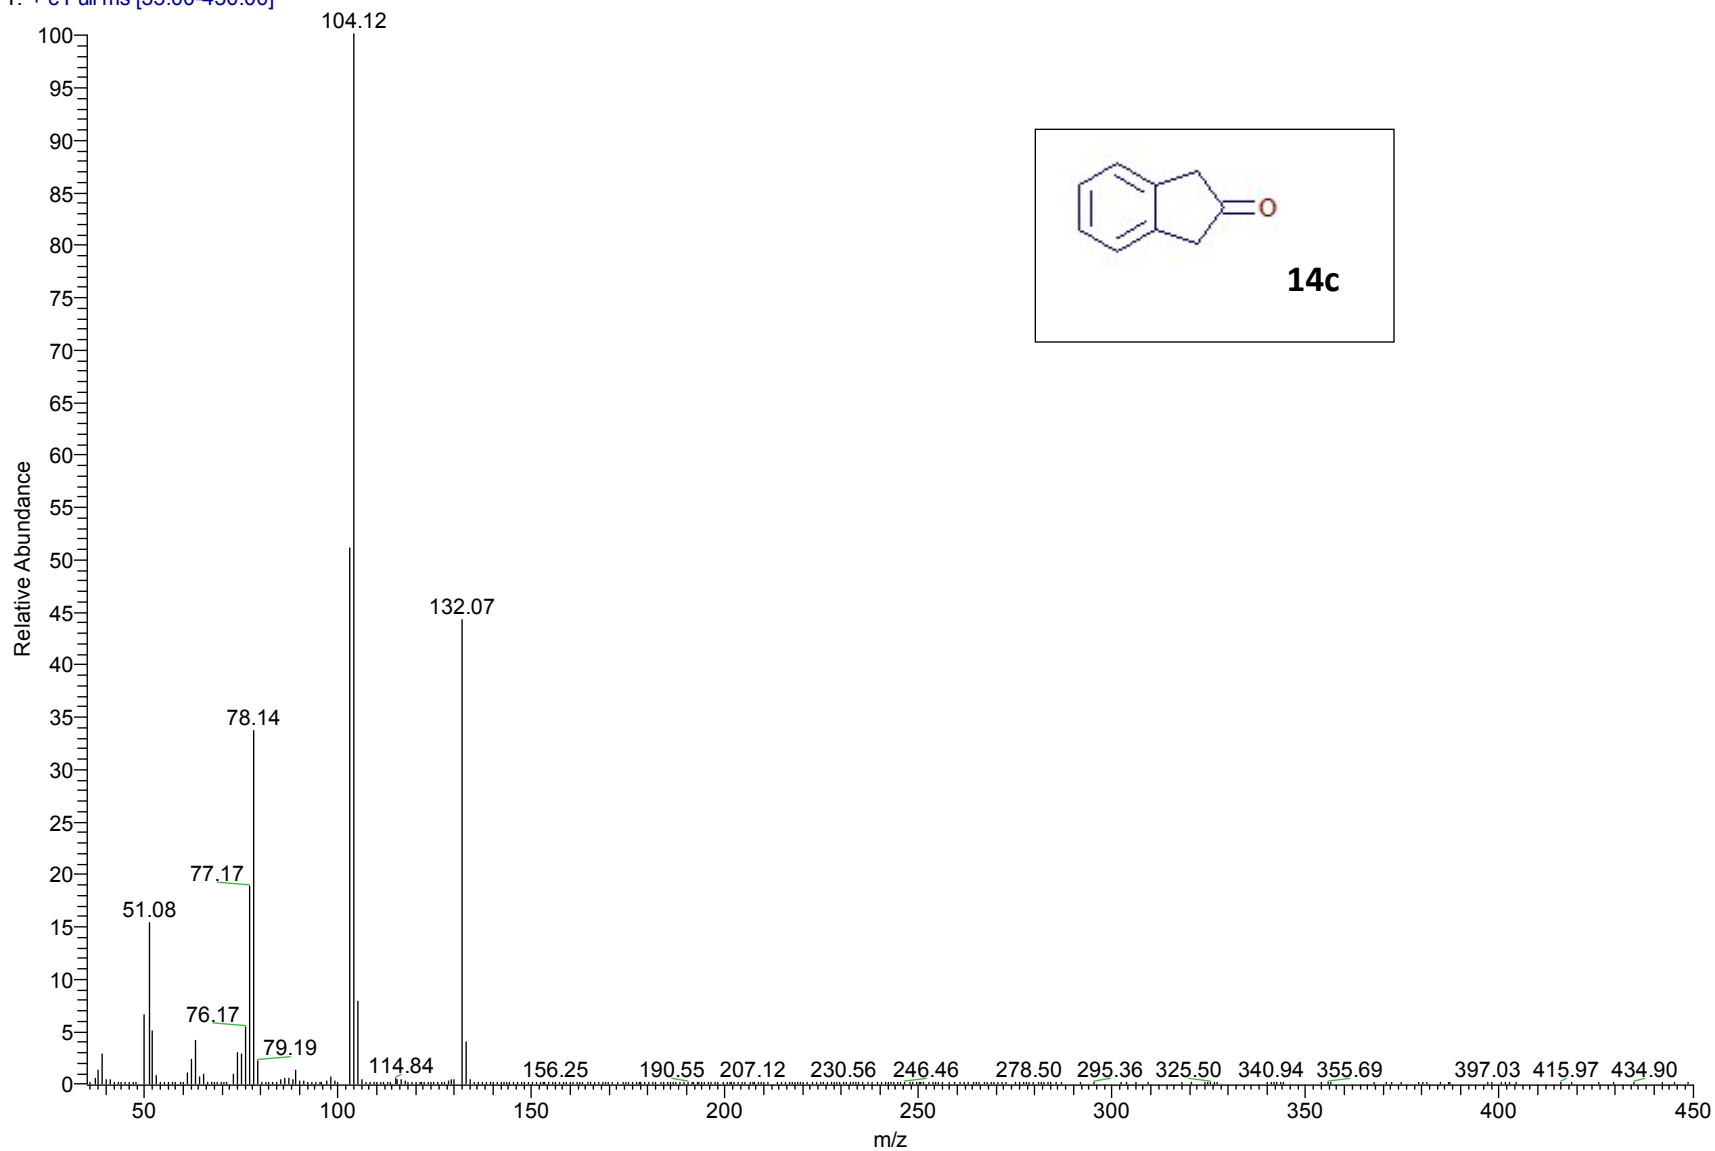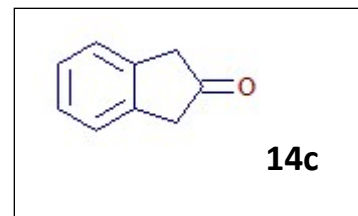

**C4**, reaction with 9,10-dihydroanthracene

RT: 0.00 - 30.04

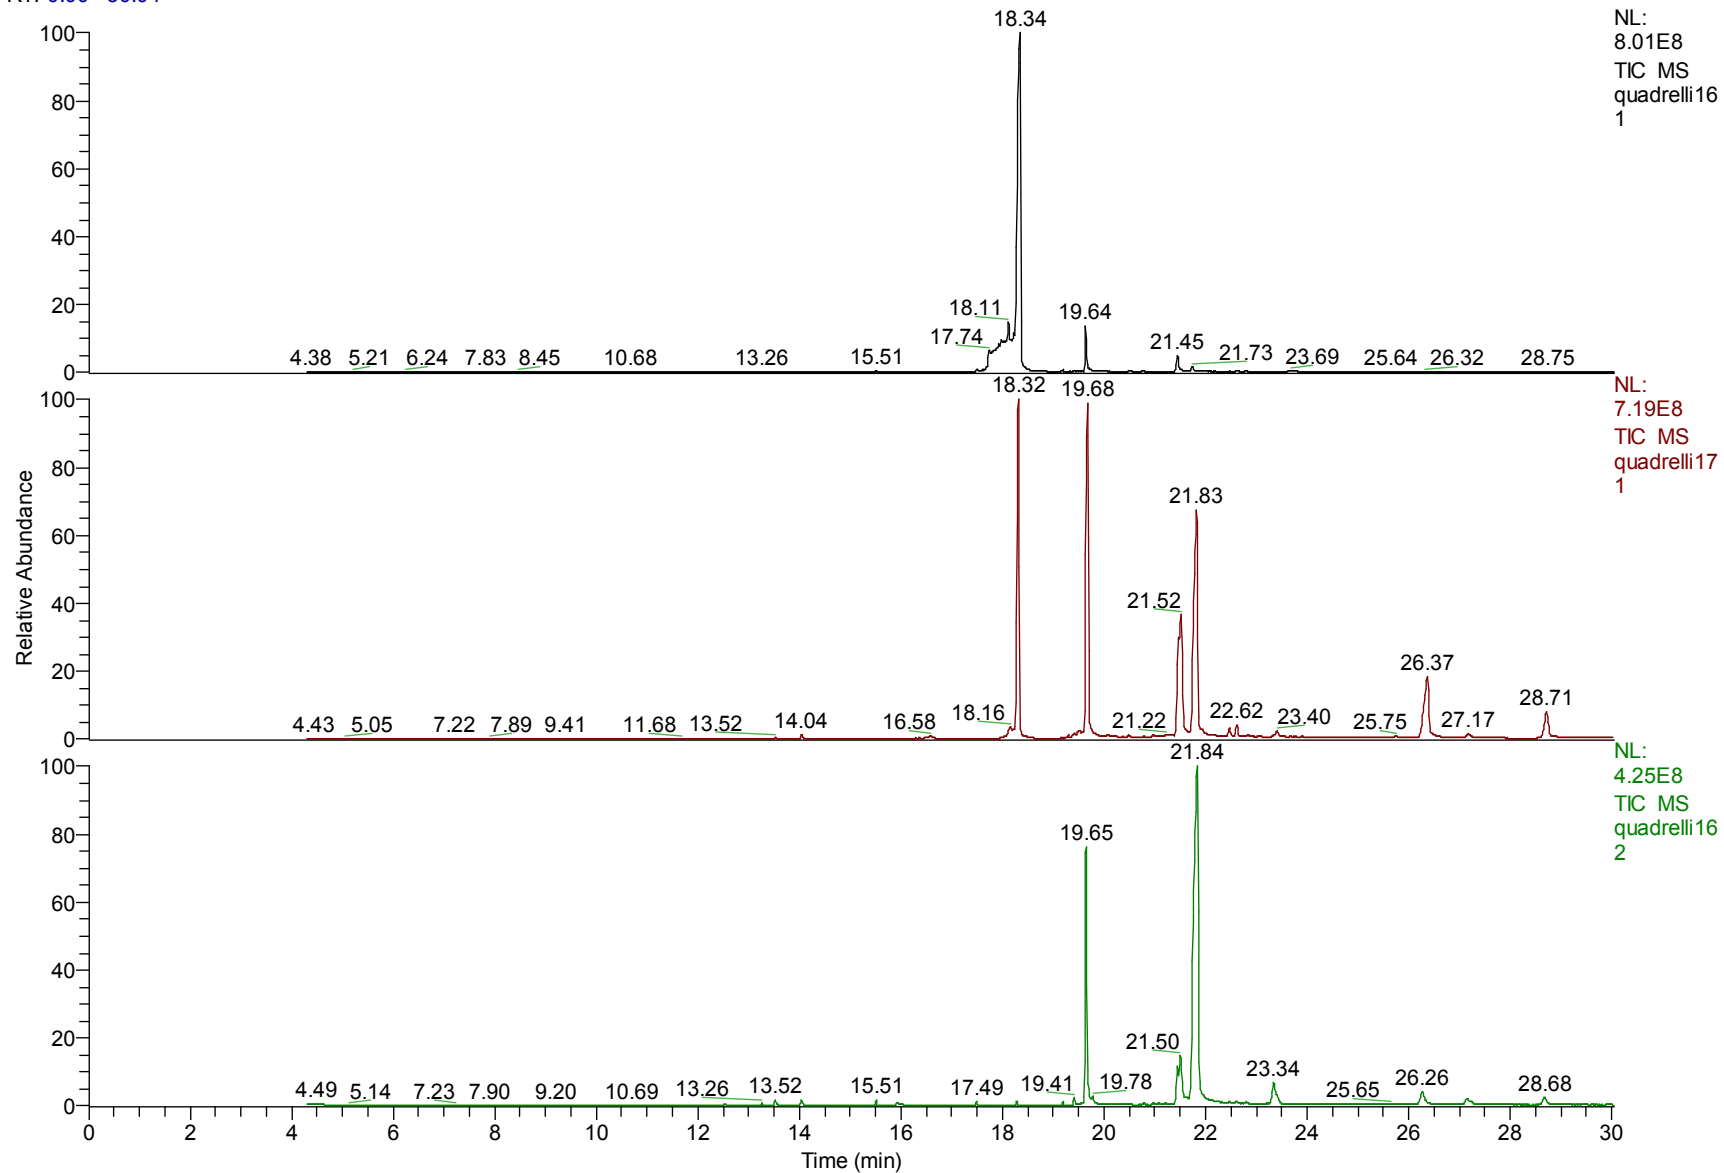

quadrelli162 #1335 RT: 19.64 AV: 1 NL: 1.67E8  
T: + c Full ms [35.00-450.00]

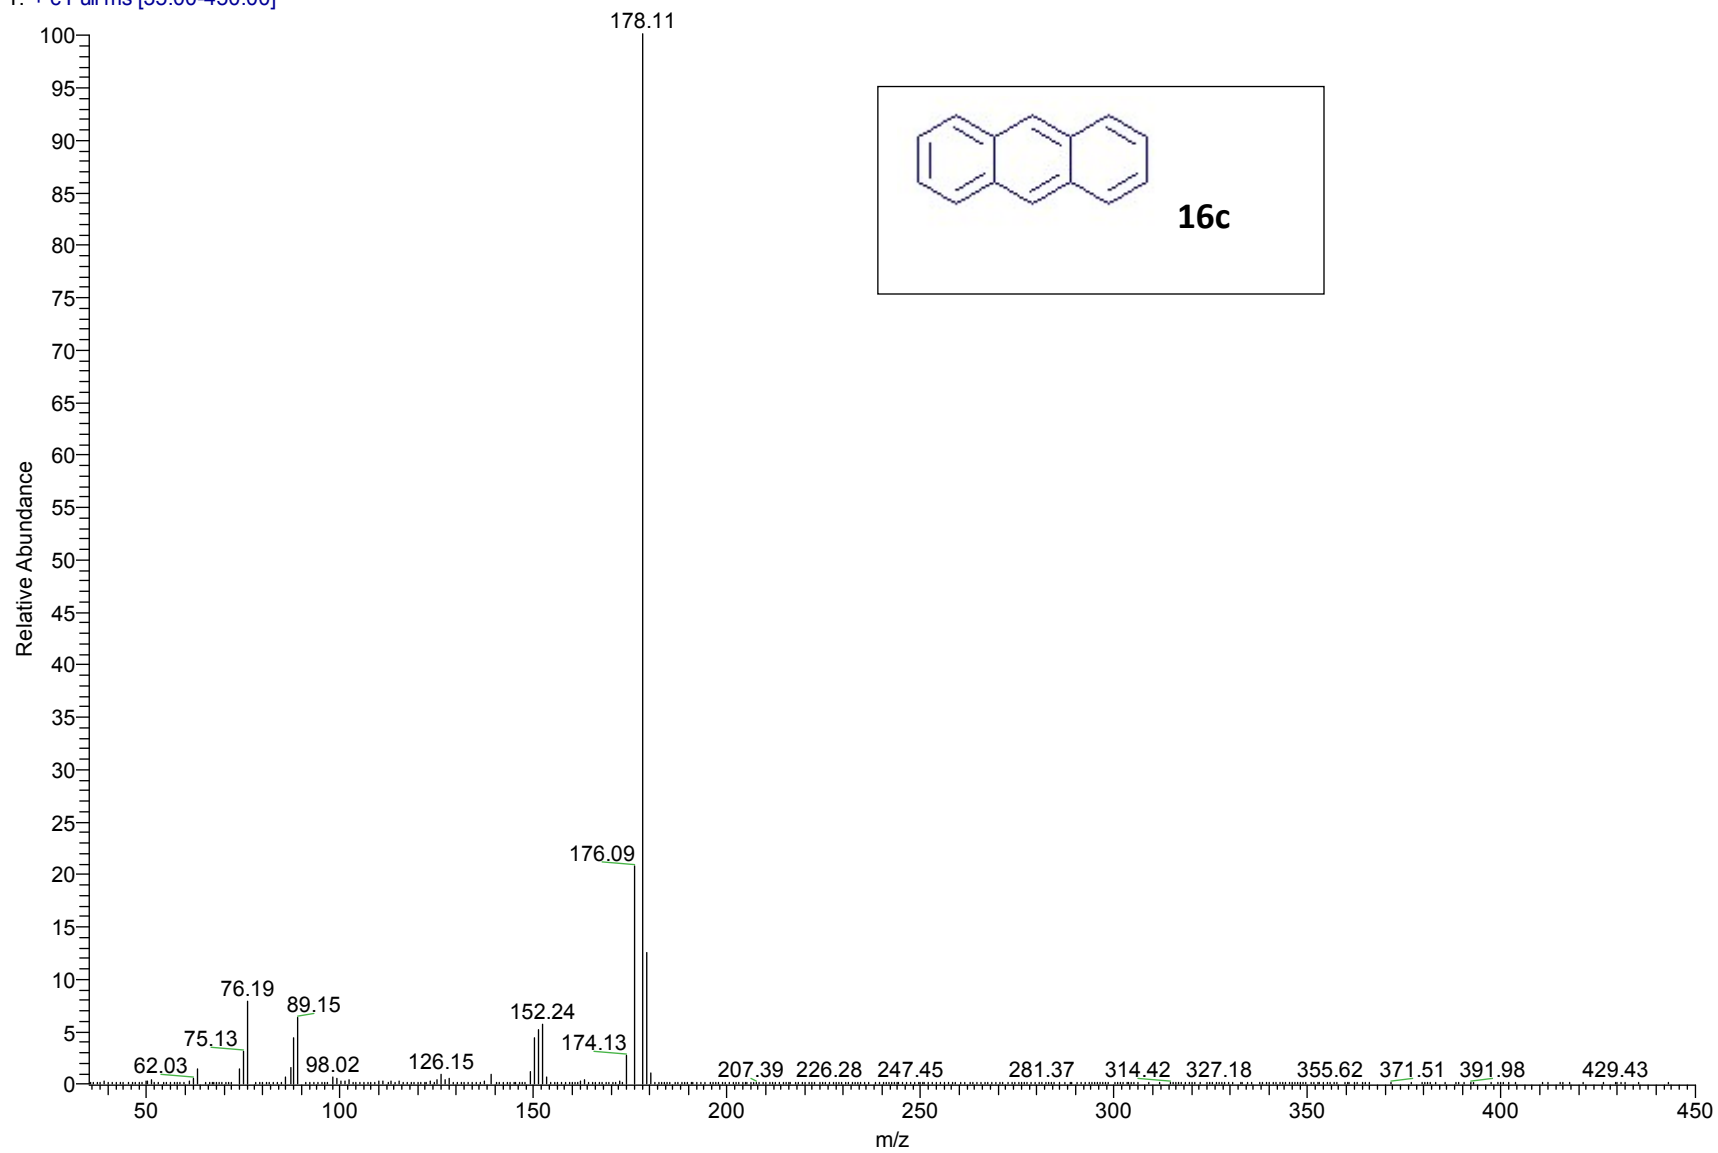



quadrelli170 #1493 RT: 21.46 AV: 1 NL: 2.32E7  
T: + c Full ms [35.00-450.00]

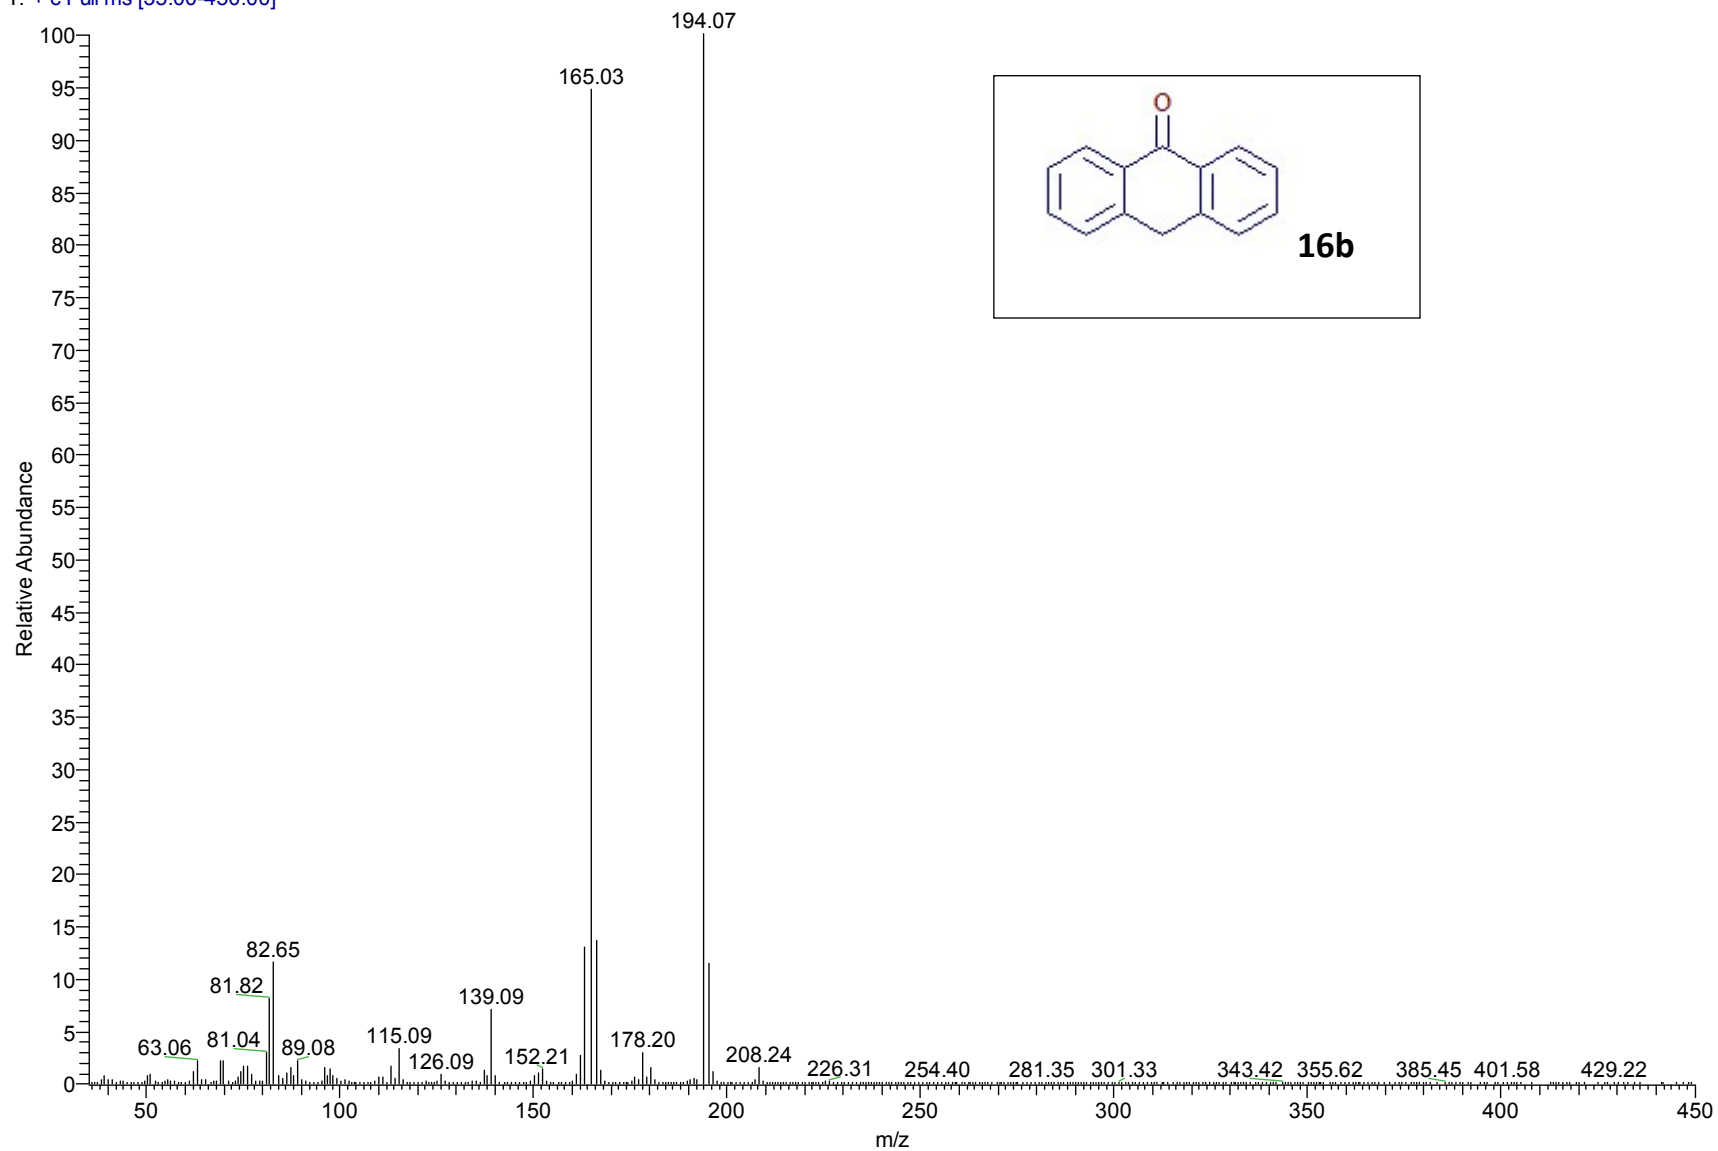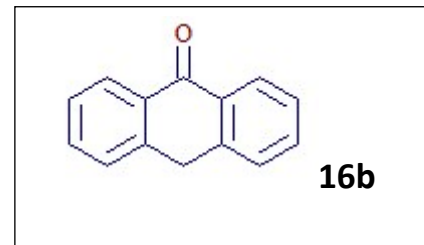

quadrelli162 #1522 RT: 21.79 AV: 1 NL: 8.27E7  
T: + c Full ms [35.00-450.00]

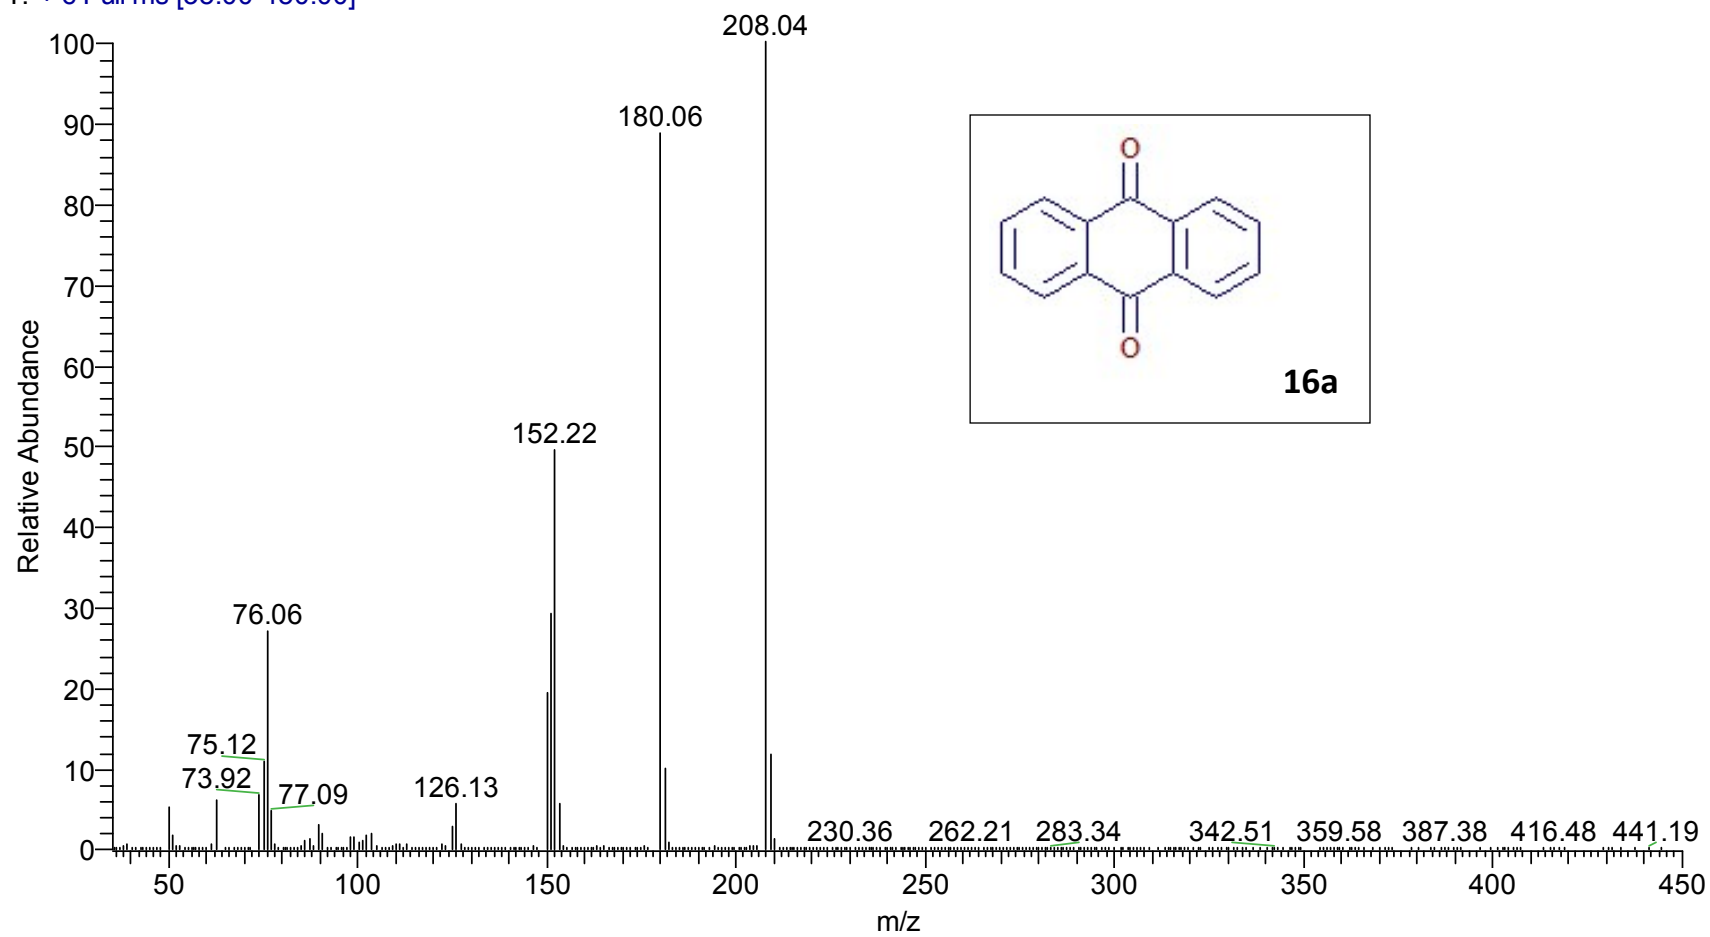

**C4**, reaction with allyl-benzene

RT: 0.00 - 30.04

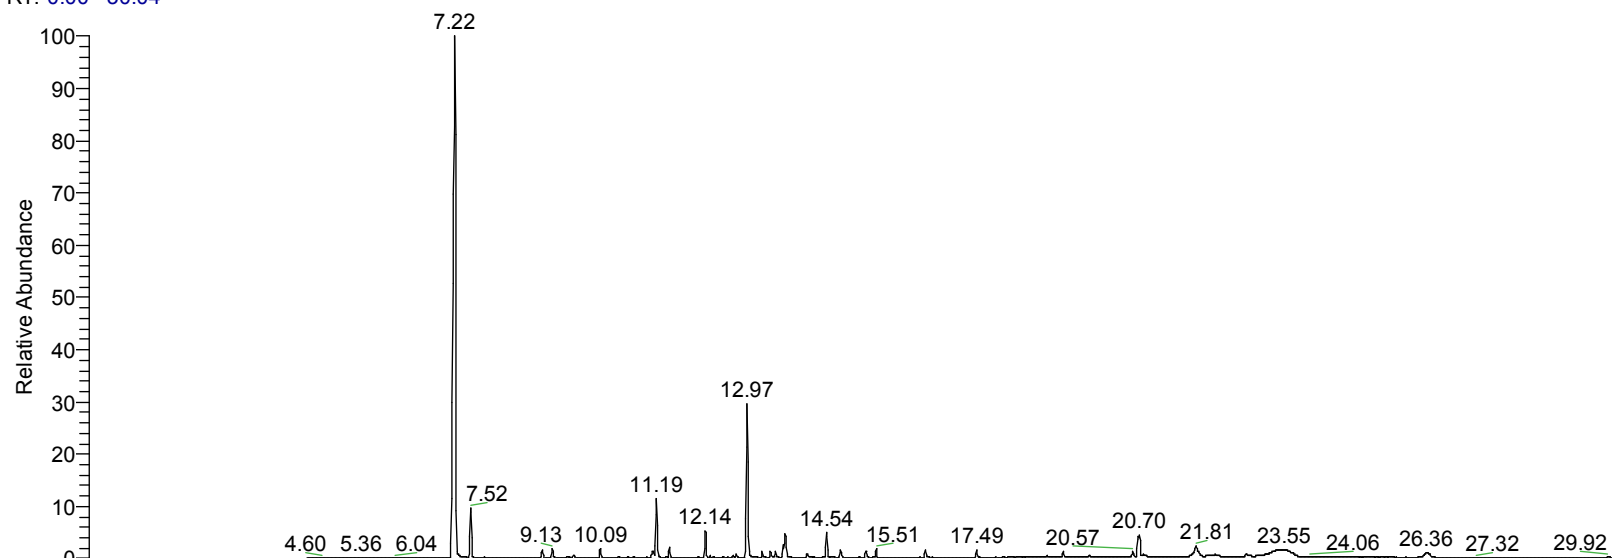

NL:  
8.46E8  
TIC MS  
quadrelli16  
6

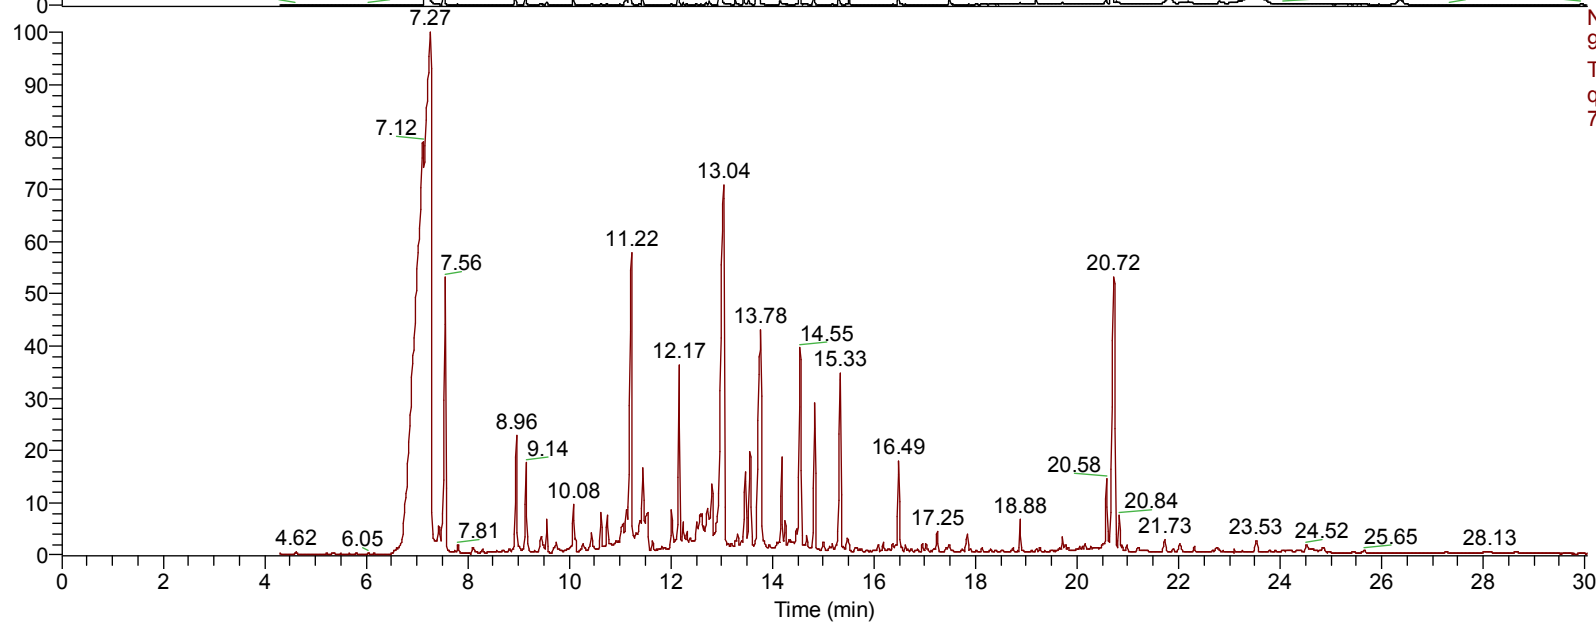

NL:  
9.66E8  
TIC MS  
quadrelli16  
7

quadrelli167 #603 RT: 11.22 AV: 1 NL: 1.11E8  
T: + c Full ms [35.00-450.00]

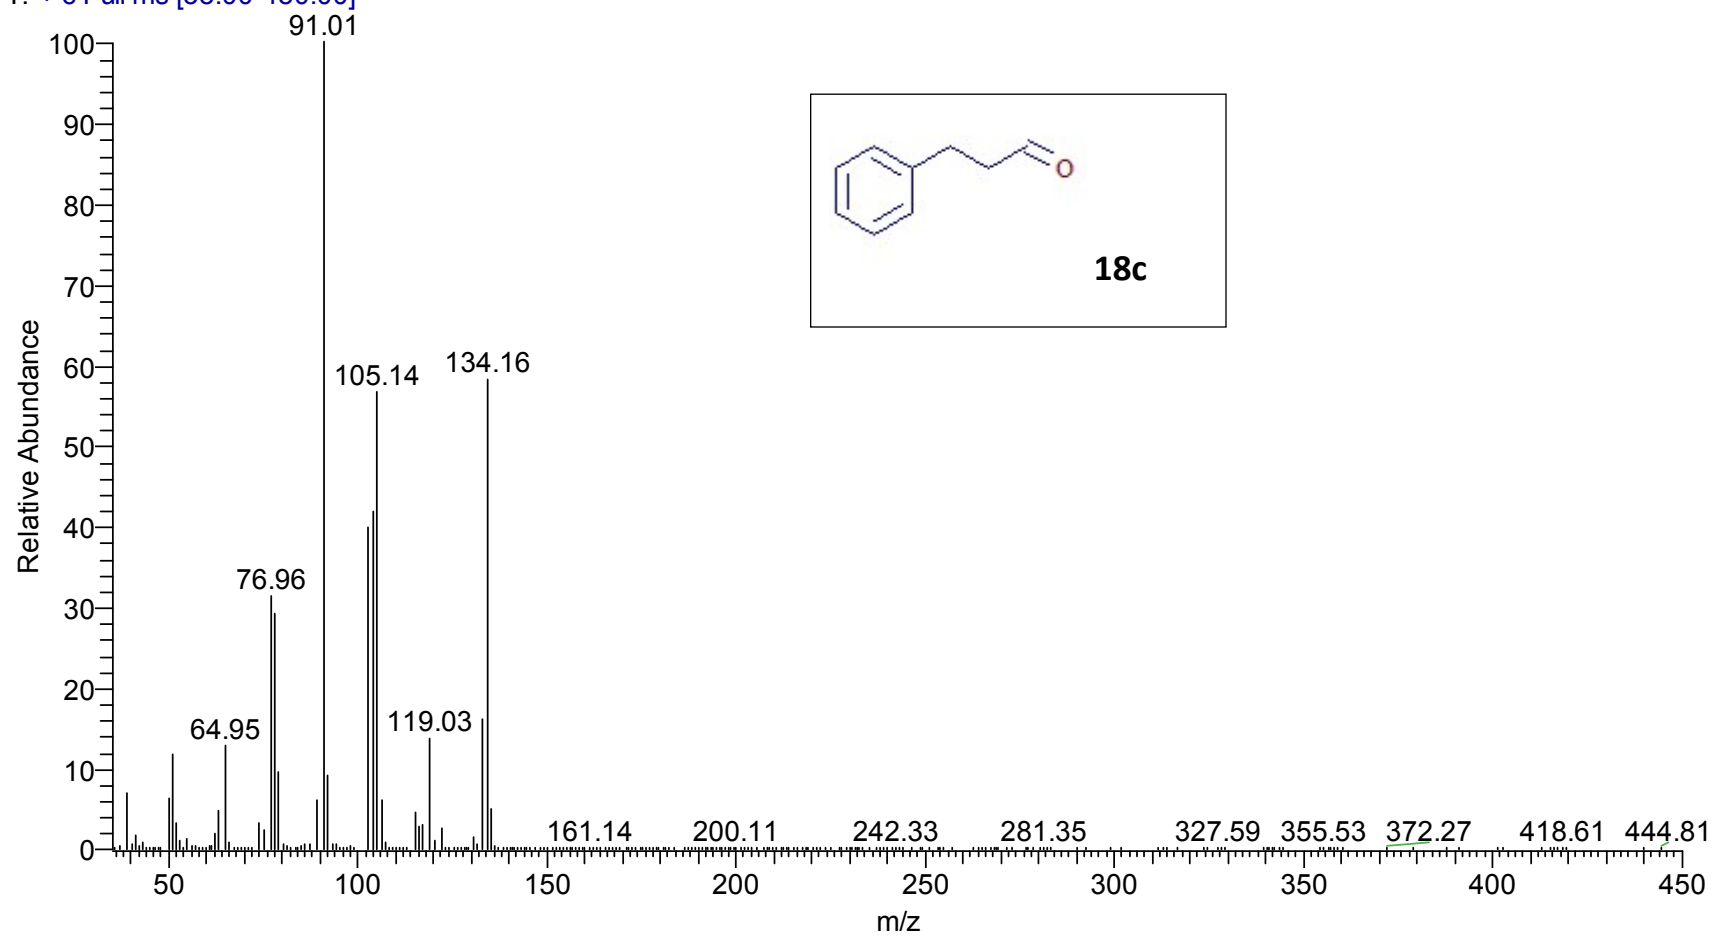

quadrelli167 #760 RT: 13.03 AV: 1 NL: 1.98E8  
T: + c Full ms [35.00-450.00]

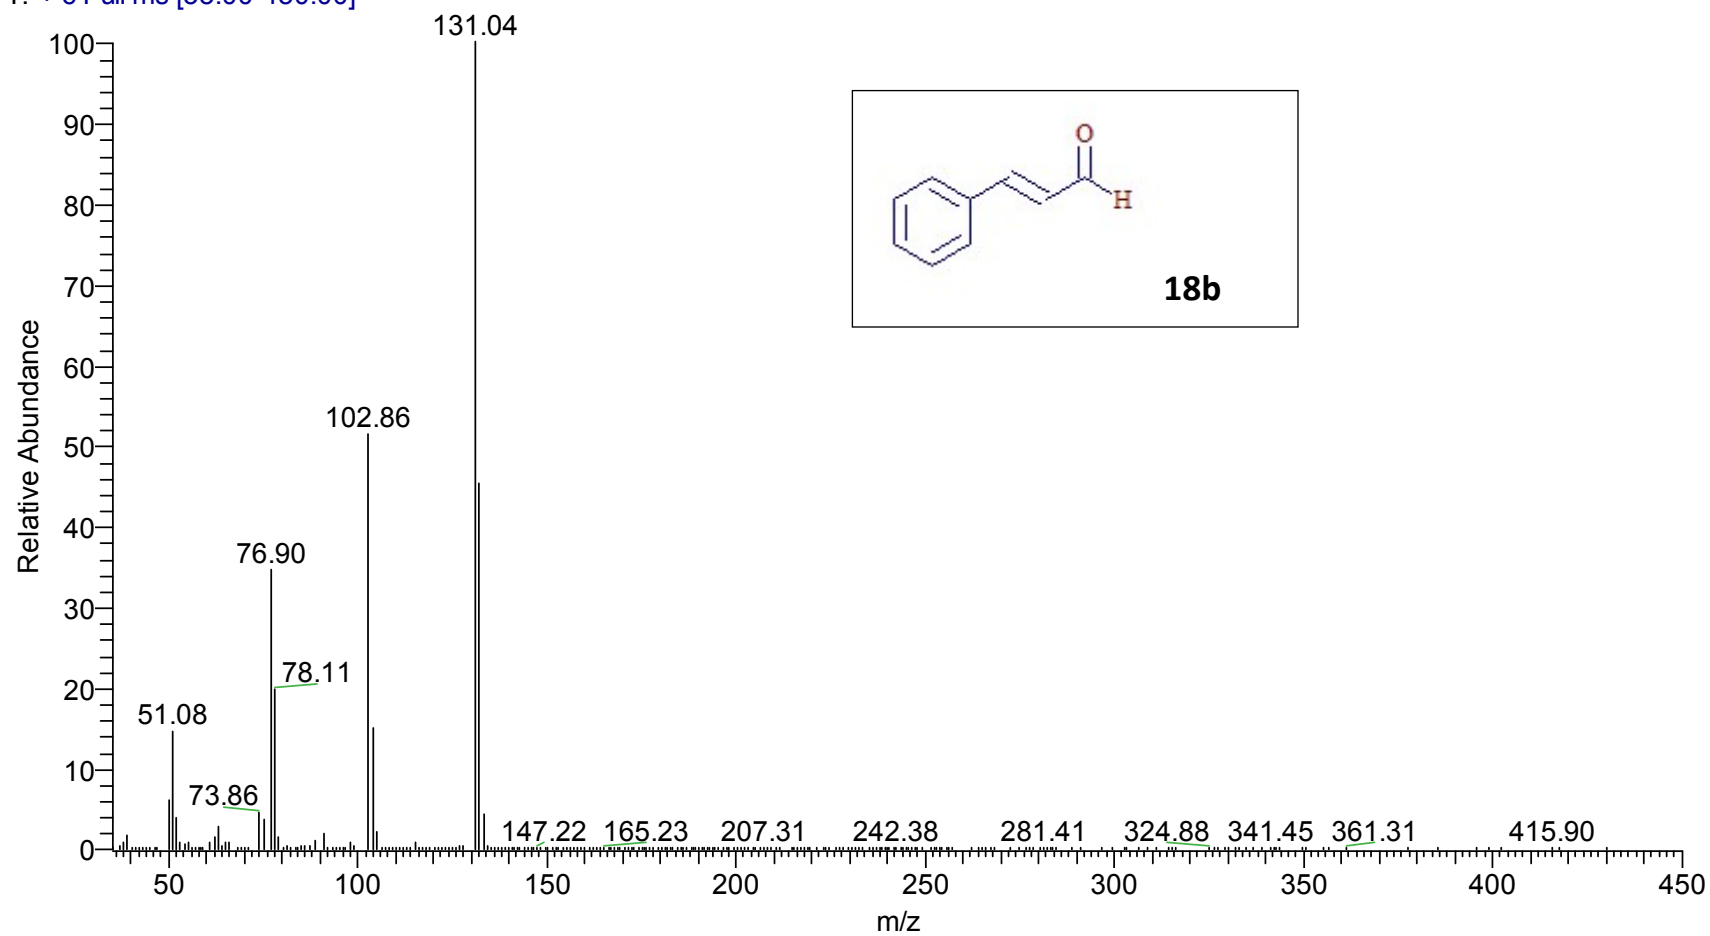

quadrelli167 #798 RT: 13.47 AV: 1 NL: 1.69E7  
T: + c Full ms [35.00-450.00]

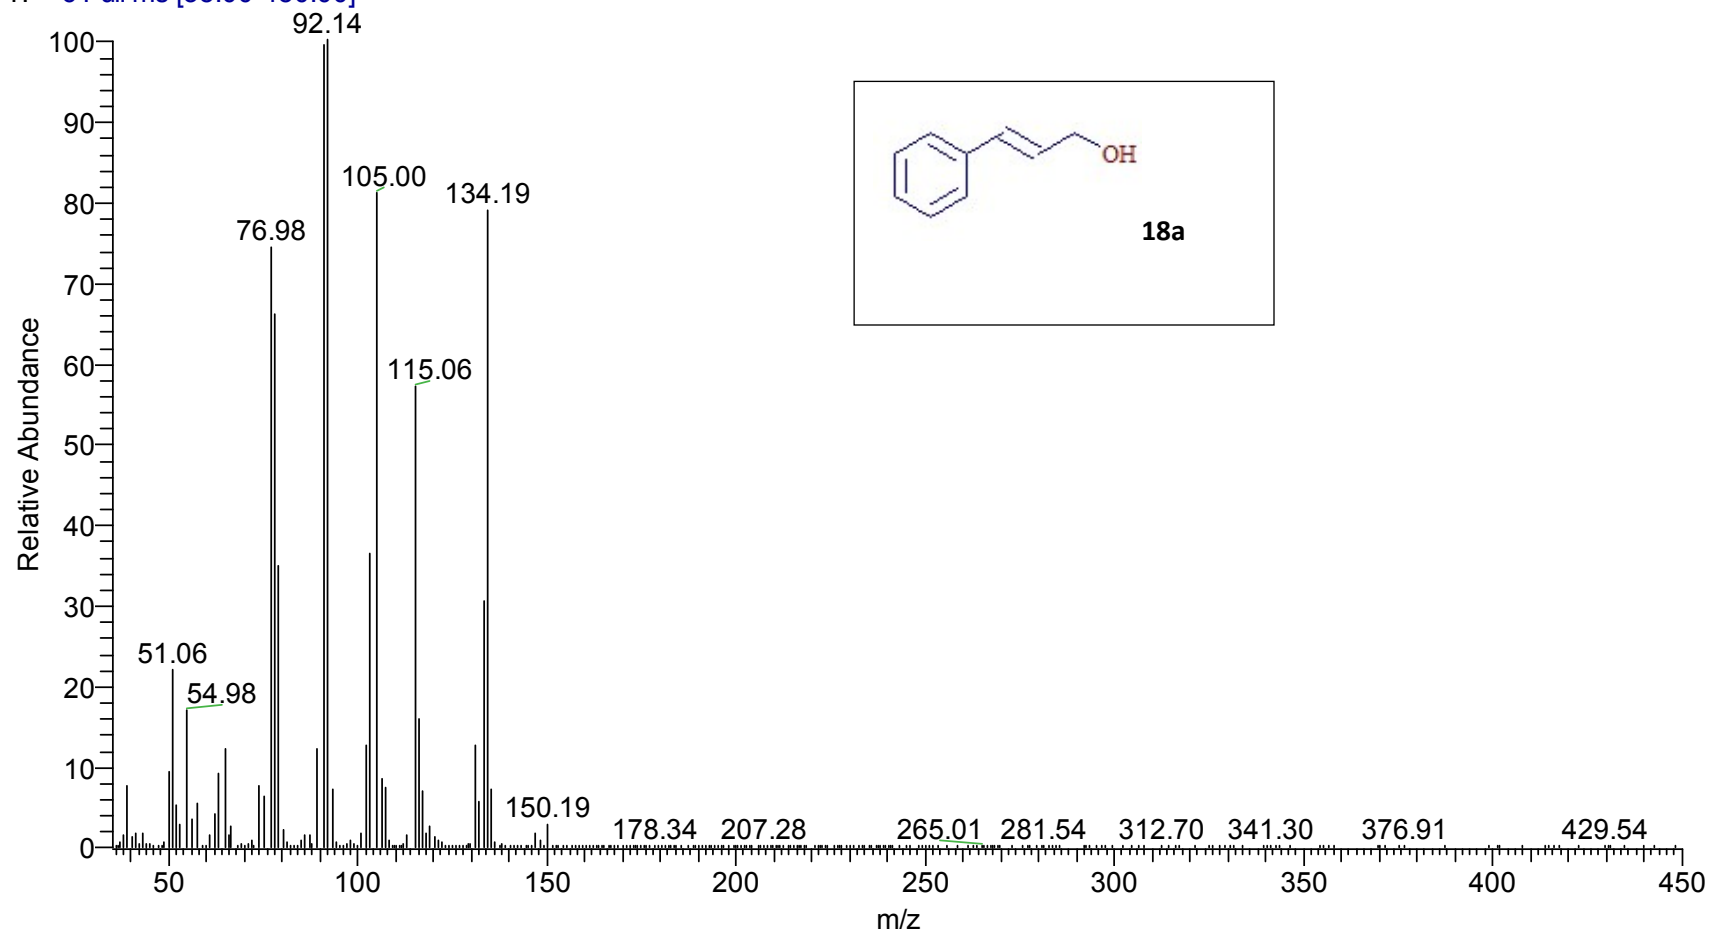

quadrelli167 #825 RT: 13.78 AV: 1 NL: 1.34E8  
T: + c Full ms [35.00-450.00]

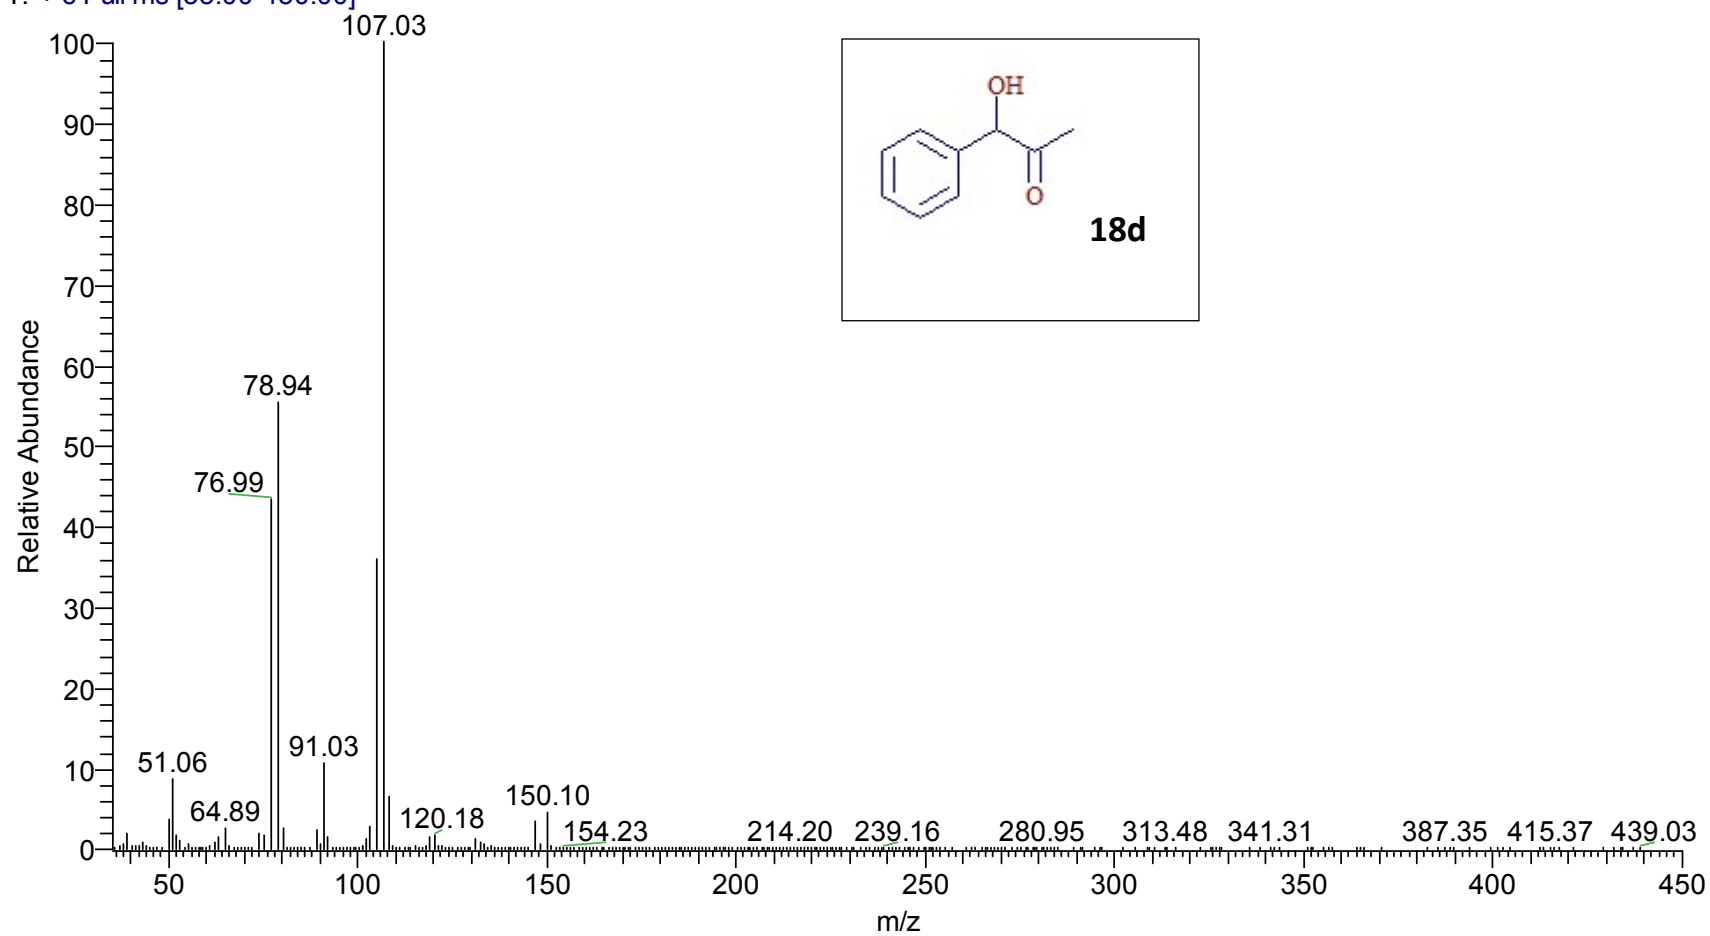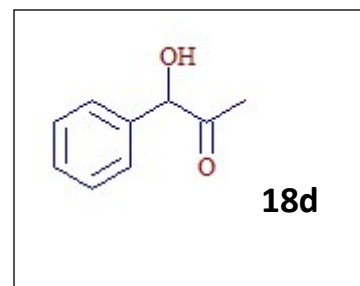

quadrelli167 #860 RT: 14.18 AV: 1 NL: 2.52E7  
T: + c Full ms [35.00-450.00]

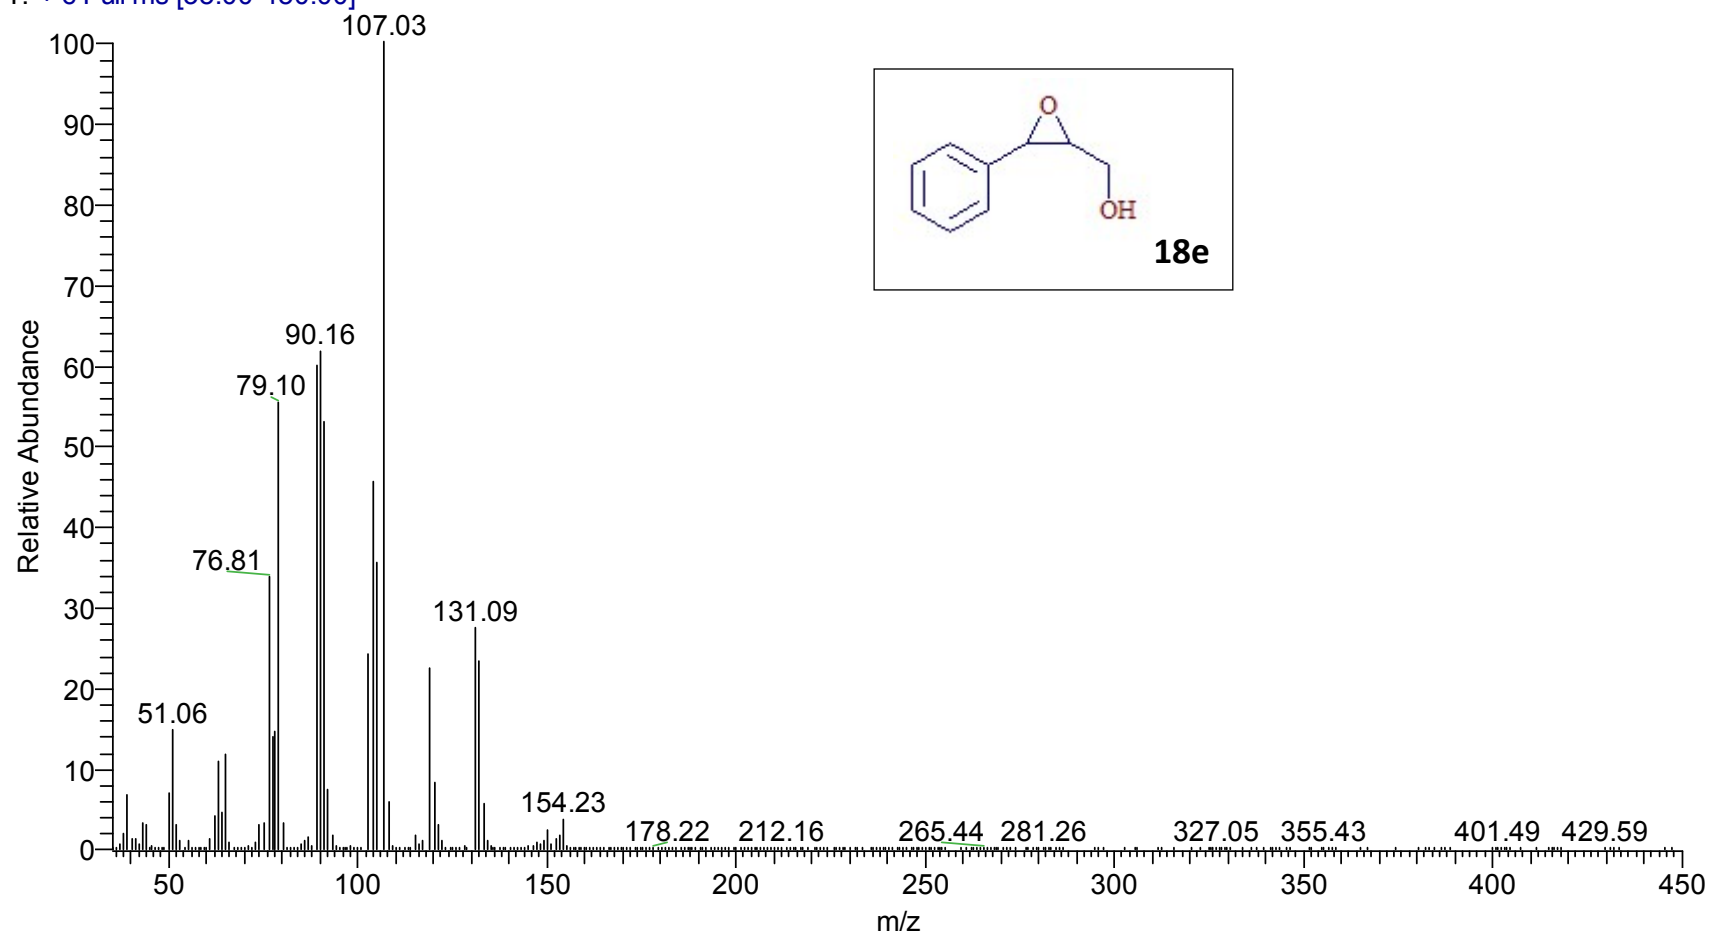



quadrelli167 #960 RT: 15.33 AV: 1 NL: 1.19E8  
T: + c Full ms [35.00-450.00]

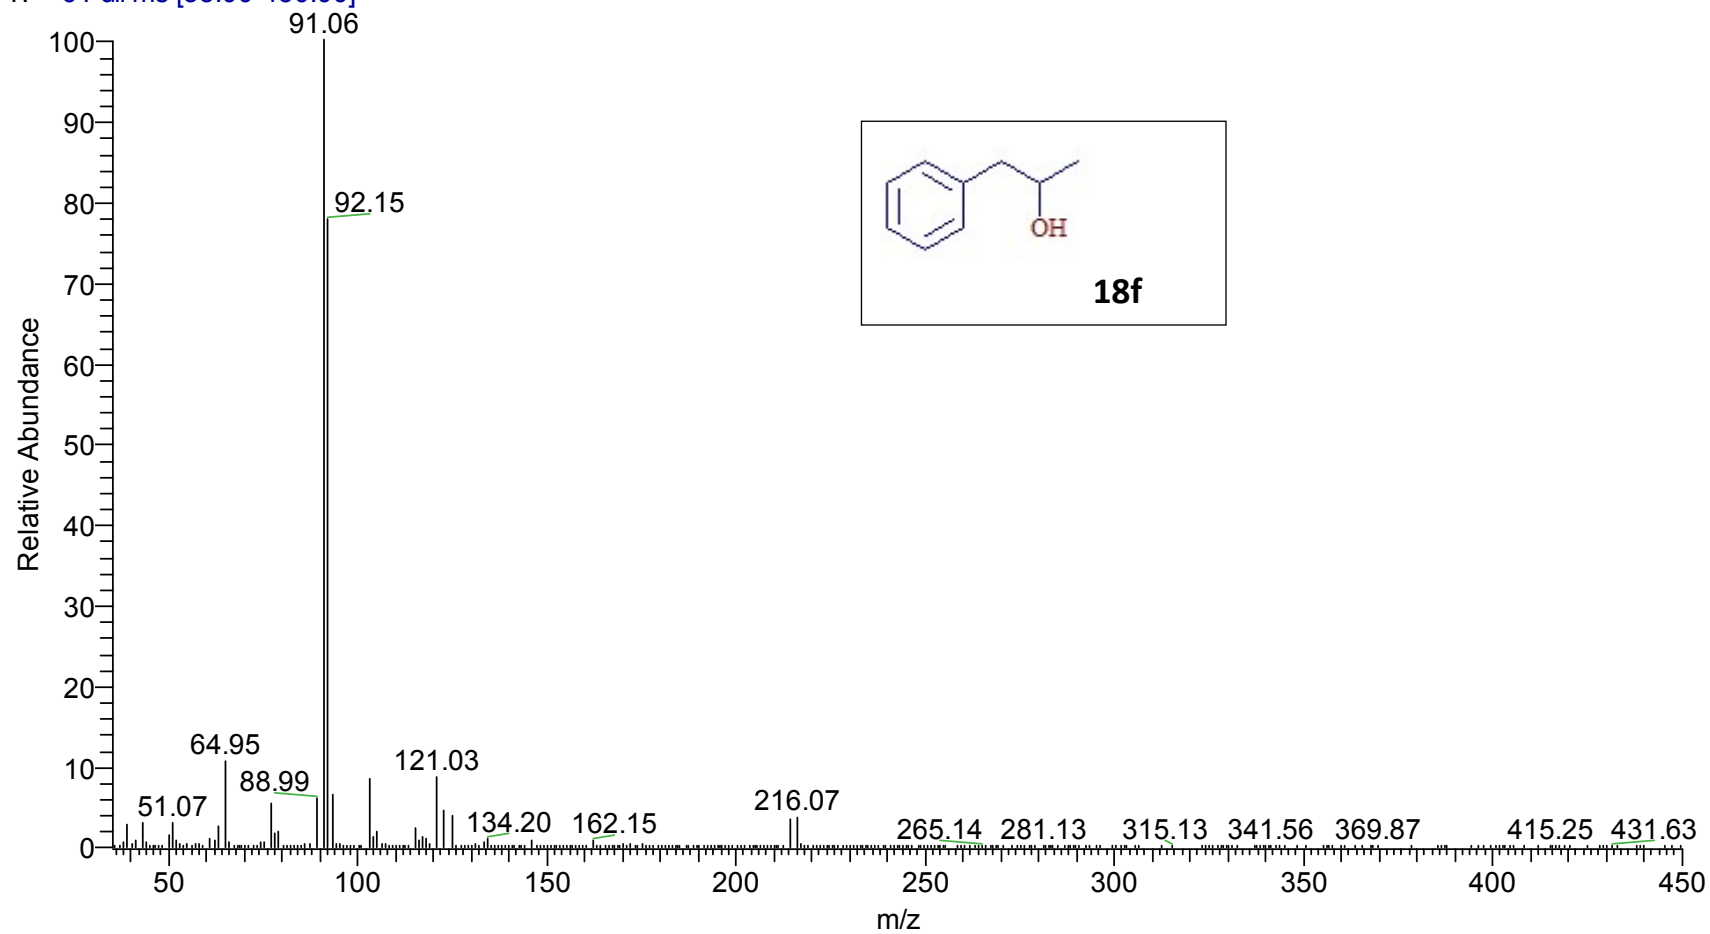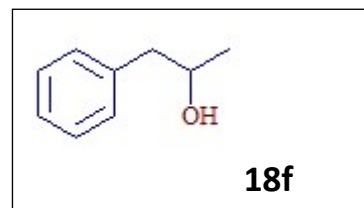

Supplement: d0cy02352c1.pdf [file d0cy02352c1.pdf]
